# Supplementary material for: Systematic study of the dynamics and half-lives of newly synthesized proteins in human cells
Source: Chem Sci. 2015 Nov 16;7(2):1393–400. doi: 10.1039/c5sc03826j (PMC5975921; doi:10.1039/c5sc03826j)
Supplement: Supplementary file 2 [file SC-007-C5SC03826J-s002.xlsx]

## Sheet: Ident
Table S1 - 1,426 newly synthesized proteins were identified in the S phase
Gene Symbol	Uniprot ID	Unique_peptide_hit	Total_peptide_hit	Annotation
A2M	P01023	3	4	Alpha-2-macroglobulin (Alpha-2-M) (C3 and PZP-like alpha-2-macroglobulin domain-containing protein 5)
AARS	P49588	9	10	Alanine--tRNA ligase, cytoplasmic (EC 6.1.1.7) (Alanyl-tRNA synthetase) (AlaRS) (Renal carcinoma antigen NY-REN-42)
AARSD1	Q9BTE6	1	1	Alanyl-tRNA editing protein Aarsd1 (Alanyl-tRNA synthetase domain-containing protein 1)
ABAT	P80404	2	3	4-aminobutyrate aminotransferase, mitochondrial (EC 2.6.1.19) ((S)-3-amino-2-methylpropionate transaminase) (EC 2.6.1.22) (GABA aminotransferase) (GABA-AT) (Gamma-amino-N-butyrate transaminase) (GABA transaminase) (GABA-T) (L-AIBAT)
ABCB1	P08183	1	1	Multidrug resistance protein 1 (EC 3.6.3.44) (ATP-binding cassette sub-family B member 1) (P-glycoprotein 1) (CD antigen CD243)
ABCC2	Q92887	3	4	Canalicular multispecific organic anion transporter 1 (ATP-binding cassette sub-family C member 2) (Canalicular multidrug resistance protein) (Multidrug resistance-associated protein 2)
ABCD3	P28288	1	1	ATP-binding cassette sub-family D member 3 (70 kDa peroxisomal membrane protein) (PMP70)
ABCE1	P61221	1	1	ATP-binding cassette sub-family E member 1 (2'-5'-oligoadenylate-binding protein) (HuHP68) (RNase L inhibitor) (Ribonuclease 4 inhibitor) (RNS4I)
ABCF1	Q8NE71	3	3	ATP-binding cassette sub-family F member 1 (ATP-binding cassette 50) (TNF-alpha-stimulated ABC protein)
ABCF2	Q9UG63	2	2	ATP-binding cassette sub-family F member 2 (Iron-inhibited ABC transporter 2)
ABHD10	Q9NUJ1	1	3	Mycophenolic acid acyl-glucuronide esterase, mitochondrial (EC 3.1.1.93) (Alpha/beta hydrolase domain-containing protein 10) (Abhydrolase domain-containing protein 10)
ABI2	Q9NYB9	1	2	Abl interactor 2 (Abelson interactor 2) (Abi-2) (Abl-binding protein 3) (AblBP3) (Arg-binding protein 1) (ArgBP1)
ACAA2	P42765	2	2	3-ketoacyl-CoA thiolase, mitochondrial (EC 2.3.1.16) (Acetyl-CoA acyltransferase) (Beta-ketothiolase) (Mitochondrial 3-oxoacyl-CoA thiolase) (T1)
ACAD9	Q9H845	1	1	Acyl-CoA dehydrogenase family member 9, mitochondrial (ACAD-9) (EC 1.3.99.-)
ACADSB	P45954	3	3	Short/branched chain specific acyl-CoA dehydrogenase, mitochondrial (SBCAD) (EC 1.3.8.5) (2-methyl branched chain acyl-CoA dehydrogenase) (2-MEBCAD) (2-methylbutyryl-coenzyme A dehydrogenase) (2-methylbutyryl-CoA dehydrogenase)
ACADVL	P49748	5	6	Very long-chain specific acyl-CoA dehydrogenase, mitochondrial (VLCAD) (EC 1.3.8.9)
ACAT2	Q9BWD1	1	1	Acetyl-CoA acetyltransferase, cytosolic (EC 2.3.1.9) (Acetyl-CoA transferase-like protein) (Cytosolic acetoacetyl-CoA thiolase)
ACBD5	Q5T8D3	1	1	Acyl-CoA-binding domain-containing protein 5
ACIN1	Q9UKV3	3	3	Apoptotic chromatin condensation inducer in the nucleus (Acinus)
ACLY	P53396	4	4	ATP-citrate synthase (EC 2.3.3.8) (ATP-citrate (pro-S-)-lyase) (ACL) (Citrate cleavage enzyme)
ACO1	P21399	2	2	Cytoplasmic aconitate hydratase (Aconitase) (EC 4.2.1.3) (Citrate hydro-lyase) (Ferritin repressor protein) (Iron regulatory protein 1) (IRP1) (Iron-responsive element-binding protein 1) (IRE-BP 1)
ACOT13	Q9NPJ3	1	1	Acyl-coenzyme A thioesterase 13 (Acyl-CoA thioesterase 13) (EC 3.1.2.-) (Thioesterase superfamily member 2) [Cleaved into: Acyl-coenzyme A thioesterase 13, N-terminally processed]
ACOT2	P49753	2	4	Acyl-coenzyme A thioesterase 2, mitochondrial (Acyl-CoA thioesterase 2) (EC 3.1.2.2) (Acyl-coenzyme A thioester hydrolase 2a) (CTE-Ia) (Long-chain acyl-CoA thioesterase 2) (ZAP128)
ACSF2	Q96CM8	4	6	Acyl-CoA synthetase family member 2, mitochondrial (EC 6.2.1.-)
ACSL3	O95573	4	5	Long-chain-fatty-acid--CoA ligase 3 (EC 6.2.1.3) (Long-chain acyl-CoA synthetase 3) (LACS 3)
ACSL4	O60488	3	3	Long-chain-fatty-acid--CoA ligase 4 (EC 6.2.1.3) (Long-chain acyl-CoA synthetase 4) (LACS 4)
ACSL5	Q9ULC5	1	1	Long-chain-fatty-acid--CoA ligase 5 (EC 6.2.1.3) (Long-chain acyl-CoA synthetase 5) (LACS 5)
ACSS1	Q9NUB1	1	1	Acetyl-coenzyme A synthetase 2-like, mitochondrial (EC 6.2.1.1) (Acetate--CoA ligase 2) (Acetyl-CoA synthetase 2) (AceCS2) (Acyl-CoA synthetase short-chain family member 1)
ACSS2	Q9NR19	1	2	Acetyl-coenzyme A synthetase, cytoplasmic (EC 6.2.1.1) (Acetate--CoA ligase) (Acetyl-CoA synthetase) (ACS) (AceCS) (Acyl-CoA synthetase short-chain family member 2) (Acyl-activating enzyme)
ACSS3	Q9H6R3	2	4	Acyl-CoA synthetase short-chain family member 3, mitochondrial (EC 6.2.1.1) (Acyl-CoA synthetase short-chain family member 3)
ACTA2	P62736	4	14	Actin, aortic smooth muscle (Alpha-actin-2) (Cell growth-inhibiting gene 46 protein)
ACTB	P60709	1	1	Actin, cytoplasmic 1 (Beta-actin) [Cleaved into: Actin, cytoplasmic 1, N-terminally processed]
ACTN1	P12814	1	1	Alpha-actinin-1 (Alpha-actinin cytoskeletal isoform) (F-actin cross-linking protein) (Non-muscle alpha-actinin-1)
ACTN4	O43707	5	6	Alpha-actinin-4 (F-actin cross-linking protein) (Non-muscle alpha-actinin 4)
ADAR	P55265	1	1	Double-stranded RNA-specific adenosine deaminase (DRADA) (EC 3.5.4.37) (136 kDa double-stranded RNA-binding protein) (p136) (Interferon-inducible protein 4) (IFI-4) (K88DSRBP)
ADNP	Q9H2P0	1	2	Activity-dependent neuroprotector homeobox protein (Activity-dependent neuroprotective protein)
ADPGK	Q9BRR6	1	1	ADP-dependent glucokinase (ADP-GK) (ADPGK) (EC 2.7.1.147) (RbBP-35)
ADSS	P30520	1	1	Adenylosuccinate synthetase isozyme 2 (AMPSase 2) (AdSS 2) (EC 6.3.4.4) (Adenylosuccinate synthetase, acidic isozyme) (Adenylosuccinate synthetase, liver isozyme) (L-type adenylosuccinate synthetase) (IMP--aspartate ligase 2)
AFF1	P51825	1	1	AF4/FMR2 family member 1 (ALL1-fused gene from chromosome 4 protein) (Protein AF-4) (Protein FEL) (Proto-oncogene AF4)
AFG3L2	Q9Y4W6	4	5	AFG3-like protein 2 (EC 3.4.24.-) (Paraplegin-like protein)
AFP	P02771	5	8	Alpha-fetoprotein (Alpha-1-fetoprotein) (Alpha-fetoglobulin)
AGK	Q53H12	3	4	Acylglycerol kinase, mitochondrial (hAGK) (EC 2.7.1.107) (EC 2.7.1.94) (Multiple substrate lipid kinase) (HsMuLK) (MuLK) (Multi-substrate lipid kinase)
AGO2	Q9UKV8	1	1	Protein argonaute-2 (Argonaute2) (hAgo2) (EC 3.1.26.n2) (Argonaute RISC catalytic component 2) (Eukaryotic translation initiation factor 2C 2) (eIF-2C 2) (eIF2C 2) (PAZ Piwi domain protein) (PPD) (Protein slicer)
AGPAT3	Q9NRZ7	1	1	1-acyl-sn-glycerol-3-phosphate acyltransferase gamma (EC 2.3.1.51) (1-acylglycerol-3-phosphate O-acyltransferase 3) (1-AGP acyltransferase 3) (1-AGPAT 3) (Lysophosphatidic acid acyltransferase gamma) (LPAAT-gamma)
AGXT	P21549	1	1	Serine--pyruvate aminotransferase (SPT) (EC 2.6.1.51) (Alanine--glyoxylate aminotransferase) (AGT) (EC 2.6.1.44)
AHCY	P23526	4	5	Adenosylhomocysteinase (AdoHcyase) (EC 3.3.1.1) (S-adenosyl-L-homocysteine hydrolase)
AHNAK	Q09666	26	30	Neuroblast differentiation-associated protein AHNAK (Desmoyokin)
AHSA1	O95433	2	3	Activator of 90 kDa heat shock protein ATPase homolog 1 (AHA1) (p38)
AIF1L	Q9BQI0	1	1	Allograft inflammatory factor 1-like (Ionized calcium-binding adapter molecule 2)
AIFM1	O95831	4	6	Apoptosis-inducing factor 1, mitochondrial (EC 1.1.1.-) (Programmed cell death protein 8)
AIG1	Q9NVV5	1	2	Androgen-induced gene 1 protein (AIG-1)
AIMP1	Q12904	1	1	Aminoacyl tRNA synthase complex-interacting multifunctional protein 1 (Multisynthase complex auxiliary component p43) [Cleaved into: Endothelial monocyte-activating polypeptide 2 (EMAP-2) (Endothelial monocyte-activating polypeptide II) (EMAP-II) (Small inducible cytokine subfamily E member 1)]
AK1	P00568	1	1	Adenylate kinase isoenzyme 1 (AK 1) (EC 2.7.4.3) (EC 2.7.4.6) (ATP-AMP transphosphorylase 1) (ATP:AMP phosphotransferase) (Adenylate monophosphate kinase) (Myokinase)
AK2	P54819	1	3	Adenylate kinase 2, mitochondrial (AK 2) (EC 2.7.4.3) (ATP-AMP transphosphorylase 2) (ATP:AMP phosphotransferase) (Adenylate monophosphate kinase) [Cleaved into: Adenylate kinase 2, mitochondrial, N-terminally processed]
AK3	Q9UIJ7	1	2	GTP:AMP phosphotransferase AK3, mitochondrial (EC 2.7.4.10) (Adenylate kinase 3) (AK 3) (Adenylate kinase 3 alpha-like 1)
AK5	Q9Y6K8	1	1	Adenylate kinase isoenzyme 5 (AK 5) (EC 2.7.4.3) (EC 2.7.4.6) (ATP-AMP transphosphorylase 5)
AKAP1	Q92667	3	3	A-kinase anchor protein 1, mitochondrial (A-kinase anchor protein 149 kDa) (AKAP 149) (Dual specificity A-kinase-anchoring protein 1) (D-AKAP-1) (Protein kinase A-anchoring protein 1) (PRKA1) (Spermatid A-kinase anchor protein 84) (S-AKAP84)
AKAP8	O43823	1	1	A-kinase anchor protein 8 (AKAP-8) (A-kinase anchor protein 95 kDa) (AKAP 95)
AKAP8L	Q9ULX6	1	1	A-kinase anchor protein 8-like (AKAP8-like protein) (Helicase A-binding protein 95) (HAP95) (Homologous to AKAP95 protein) (HA95) (Neighbor of A-kinase-anchoring protein 95) (Neighbor of AKAP95)
AKAP9	Q99996	1	1	A-kinase anchor protein 9 (AKAP-9) (A-kinase anchor protein 350 kDa) (AKAP 350) (hgAKAP 350) (A-kinase anchor protein 450 kDa) (AKAP 450) (AKAP 120-like protein) (Centrosome- and Golgi-localized PKN-associated protein) (CG-NAP) (Protein hyperion) (Protein kinase A-anchoring protein 9) (PRKA9) (Protein yotiao)
AKR1A1	P14550	1	1	Alcohol dehydrogenase [NADP(+)] (EC 1.1.1.2) (Aldehyde reductase) (Aldo-keto reductase family 1 member A1)
AKR1B1	P15121	1	1	Aldose reductase (AR) (EC 1.1.1.21) (Aldehyde reductase) (Aldo-keto reductase family 1 member B1)
AKR1C3	P42330	4	5	Aldo-keto reductase family 1 member C3 (EC 1.-.-.-) (17-beta-hydroxysteroid dehydrogenase type 5) (17-beta-HSD 5) (3-alpha-HSD type II, brain) (3-alpha-hydroxysteroid dehydrogenase type 2) (3-alpha-HSD type 2) (EC 1.1.1.357) (Chlordecone reductase homolog HAKRb) (Dihydrodiol dehydrogenase 3) (DD-3) (DD3) (Dihydrodiol dehydrogenase type I) (HA1753) (Indanol dehydrogenase) (EC 1.1.1.112) (Prostagla…
ALDH18A1	P54886	1	1	Delta-1-pyrroline-5-carboxylate synthase (P5CS) (Aldehyde dehydrogenase family 18 member A1) [Includes: Glutamate 5-kinase (GK) (EC 2.7.2.11) (Gamma-glutamyl kinase); Gamma-glutamyl phosphate reductase (GPR) (EC 1.2.1.41) (Glutamate-5-semialdehyde dehydrogenase) (Glutamyl-gamma-semialdehyde dehydrogenase)]
ALDH1A1	P00352	2	2	Retinal dehydrogenase 1 (RALDH 1) (RalDH1) (EC 1.2.1.36) (ALDH-E1) (ALHDII) (Aldehyde dehydrogenase family 1 member A1) (Aldehyde dehydrogenase, cytosolic)
ALDH1B1	P30837	2	3	Aldehyde dehydrogenase X, mitochondrial (EC 1.2.1.3) (Aldehyde dehydrogenase 5) (Aldehyde dehydrogenase family 1 member B1)
ALDH2	P05091	2	2	Aldehyde dehydrogenase, mitochondrial (EC 1.2.1.3) (ALDH class 2) (ALDH-E2) (ALDHI)
ALDH3A2	P51648	1	2	Fatty aldehyde dehydrogenase (EC 1.2.1.3) (Aldehyde dehydrogenase 10) (Aldehyde dehydrogenase family 3 member A2) (Microsomal aldehyde dehydrogenase)
ALDH4A1	P30038	3	5	Delta-1-pyrroline-5-carboxylate dehydrogenase, mitochondrial (P5C dehydrogenase) (EC 1.2.1.88) (Aldehyde dehydrogenase family 4 member A1) (L-glutamate gamma-semialdehyde dehydrogenase)
ALDH5A1	P51649	3	3	Succinate-semialdehyde dehydrogenase, mitochondrial (EC 1.2.1.24) (Aldehyde dehydrogenase family 5 member A1) (NAD(+)-dependent succinic semialdehyde dehydrogenase)
ALDH6A1	Q02252	3	5	Methylmalonate-semialdehyde dehydrogenase [acylating], mitochondrial (MMSDH) (Malonate-semialdehyde dehydrogenase [acylating]) (EC 1.2.1.18) (EC 1.2.1.27) (Aldehyde dehydrogenase family 6 member A1)
ALDH7A1	P49419	2	3	Alpha-aminoadipic semialdehyde dehydrogenase (Alpha-AASA dehydrogenase) (EC 1.2.1.31) (Aldehyde dehydrogenase family 7 member A1) (EC 1.2.1.3) (Antiquitin-1) (Betaine aldehyde dehydrogenase) (EC 1.2.1.8) (Delta1-piperideine-6-carboxylate dehydrogenase) (P6c dehydrogenase)
ALDOA	P04075	9	14	Fructose-bisphosphate aldolase A (EC 4.1.2.13) (Lung cancer antigen NY-LU-1) (Muscle-type aldolase)
ALG12	Q9BV10	1	1	Dol-P-Man:Man(7)GlcNAc(2)-PP-Dol alpha-1,6-mannosyltransferase (EC 2.4.1.260) (Asparagine-linked glycosylation protein 12 homolog) (hALG12) (Dolichyl-P-Man:Man(7)GlcNAc(2)-PP-dolichyl-alpha-1,6-mannosyltransferase) (Mannosyltransferase ALG12 homolog) (Membrane protein SB87)
ALG6	Q9Y672	1	1	Dolichyl pyrophosphate Man9GlcNAc2 alpha-1,3-glucosyltransferase (EC 2.4.1.267) (Asparagine-linked glycosylation protein 6 homolog) (Dol-P-Glc:Man(9)GlcNAc(2)-PP-Dol alpha-1,3-glucosyltransferase) (Dolichyl-P-Glc:Man9GlcNAc2-PP-dolichyl glucosyltransferase)
ALKBH8	Q96BT7	1	1	Alkylated DNA repair protein alkB homolog 8 (EC 1.14.11.-) (Probable alpha-ketoglutarate-dependent dioxygenase ABH8) (S-adenosyl-L-methionine-dependent tRNA methyltransferase ABH8) (tRNA (carboxymethyluridine(34)-5-O)-methyltransferase ABH8) (EC 2.1.1.229)
AMBP	P02760	1	1	Protein AMBP [Cleaved into: Alpha-1-microglobulin (Protein HC) (Alpha-1 microglycoprotein) (Complex-forming glycoprotein heterogeneous in charge); Inter-alpha-trypsin inhibitor light chain (ITI-LC) (Bikunin) (EDC1) (HI-30) (Uronic-acid-rich protein); Trypstatin]
ANAPC4	Q9UJX5	1	1	Anaphase-promoting complex subunit 4 (APC4) (Cyclosome subunit 4)
ANK1	P16157	1	1	Ankyrin-1 (ANK-1) (Ankyrin-R) (Erythrocyte ankyrin)
ANKRD50	Q9ULJ7	1	1	Ankyrin repeat domain-containing protein 50
ANKRD66	B5MCB5	1	1	Ankyrin repeat domain-containing protein 66
ANXA11	P50995	1	1	Annexin A11 (56 kDa autoantigen) (Annexin XI) (Annexin-11) (Calcyclin-associated annexin 50) (CAP-50)
ANXA4	P09525	3	3	Annexin A4 (35-beta calcimedin) (Annexin IV) (Annexin-4) (Carbohydrate-binding protein p33/p41) (Chromobindin-4) (Endonexin I) (Lipocortin IV) (P32.5) (PP4-X) (Placental anticoagulant protein II) (PAP-II) (Protein II)
ANXA5	P08758	2	2	Annexin A5 (Anchorin CII) (Annexin V) (Annexin-5) (Calphobindin I) (CBP-I) (Endonexin II) (Lipocortin V) (Placental anticoagulant protein 4) (PP4) (Placental anticoagulant protein I) (PAP-I) (Thromboplastin inhibitor) (Vascular anticoagulant-alpha) (VAC-alpha)
ANXA6	P08133	4	5	Annexin A6 (67 kDa calelectrin) (Annexin VI) (Annexin-6) (Calphobindin-II) (CPB-II) (Chromobindin-20) (Lipocortin VI) (Protein III) (p68) (p70)
AP1B1	Q10567	2	3	AP-1 complex subunit beta-1 (Adapter-related protein complex 1 subunit beta-1) (Adaptor protein complex AP-1 subunit beta-1) (Beta-1-adaptin) (Beta-adaptin 1) (Clathrin assembly protein complex 1 beta large chain) (Golgi adaptor HA1/AP1 adaptin beta subunit)
AP2A1	O95782	1	1	AP-2 complex subunit alpha-1 (100 kDa coated vesicle protein A) (Adapter-related protein complex 2 subunit alpha-1) (Adaptor protein complex AP-2 subunit alpha-1) (Alpha-adaptin A) (Alpha1-adaptin) (Clathrin assembly protein complex 2 alpha-A large chain) (Plasma membrane adaptor HA2/AP2 adaptin alpha A subunit)
AP2A2	O94973	1	1	AP-2 complex subunit alpha-2 (100 kDa coated vesicle protein C) (Adapter-related protein complex 2 subunit alpha-2) (Adaptor protein complex AP-2 subunit alpha-2) (Alpha-adaptin C) (Alpha2-adaptin) (Clathrin assembly protein complex 2 alpha-C large chain) (Huntingtin yeast partner J) (Huntingtin-interacting protein 9) (HIP-9) (Huntingtin-interacting protein J) (Plasma membrane adaptor HA2/AP2 ada…
AP2B1	P63010	2	2	AP-2 complex subunit beta (AP105B) (Adapter-related protein complex 2 subunit beta) (Adaptor protein complex AP-2 subunit beta) (Beta-2-adaptin) (Beta-adaptin) (Clathrin assembly protein complex 2 beta large chain) (Plasma membrane adaptor HA2/AP2 adaptin beta subunit)
AP2M1	Q96CW1	3	3	AP-2 complex subunit mu (AP-2 mu chain) (Adapter-related protein complex 2 subunit mu) (Adaptin-mu2) (Adaptor protein complex AP-2 subunit mu) (Clathrin assembly protein complex 2 mu medium chain) (Clathrin coat assembly protein AP50) (Clathrin coat-associated protein AP50) (HA2 50 kDa subunit) (Plasma membrane adaptor AP-2 50 kDa protein)
AP3B1	O00203	2	2	AP-3 complex subunit beta-1 (Adapter-related protein complex 3 subunit beta-1) (Adaptor protein complex AP-3 subunit beta-1) (Beta-3A-adaptin) (Clathrin assembly protein complex 3 beta-1 large chain)
AP3D1	O14617	2	2	AP-3 complex subunit delta-1 (AP-3 complex subunit delta) (Adapter-related protein complex 3 subunit delta-1) (Delta-adaptin)
APEX1	P27695	1	1	DNA-(apurinic or apyrimidinic site) lyase (EC 3.1.-.-) (EC 4.2.99.18) (APEX nuclease) (APEN) (Apurinic-apyrimidinic endonuclease 1) (AP endonuclease 1) (APE-1) (REF-1) (Redox factor-1) [Cleaved into: DNA-(apurinic or apyrimidinic site) lyase, mitochondrial]
APMAP	Q9HDC9	2	3	Adipocyte plasma membrane-associated protein (Protein BSCv)
APOB	P04114	16	18	Apolipoprotein B-100 (Apo B-100) [Cleaved into: Apolipoprotein B-48 (Apo B-48)]
APOH	P02749	1	1	Beta-2-glycoprotein 1 (APC inhibitor) (Activated protein C-binding protein) (Anticardiolipin cofactor) (Apolipoprotein H) (Apo-H) (Beta-2-glycoprotein I) (B2GPI) (Beta(2)GPI)
APPL1	Q9UKG1	1	1	DCC-interacting protein 13-alpha (Dip13-alpha) (Adapter protein containing PH domain, PTB domain and leucine zipper motif 1)
ARCN1	P48444	2	2	Coatomer subunit delta (Archain) (Delta-coat protein) (Delta-COP)
ARF3	P61204	1	1	ADP-ribosylation factor 3
ARFGAP3	Q9NP61	1	3	ADP-ribosylation factor GTPase-activating protein 3 (ARF GAP 3)
ARFGEF1	Q9Y6D6	1	2	Brefeldin A-inhibited guanine nucleotide-exchange protein 1 (Brefeldin A-inhibited GEP 1) (ADP-ribosylation factor guanine nucleotide-exchange factor 1) (p200 ARF guanine nucleotide exchange factor) (p200 ARF-GEP1)
ARHGAP1	Q07960	3	4	Rho GTPase-activating protein 1 (CDC42 GTPase-activating protein) (GTPase-activating protein rhoOGAP) (Rho-related small GTPase protein activator) (Rho-type GTPase-activating protein 1) (p50-RhoGAP)
ARHGAP18	Q8N392	4	4	Rho GTPase-activating protein 18 (MacGAP) (Rho-type GTPase-activating protein 18)
ARHGEF18	Q6ZSZ5	1	1	Rho guanine nucleotide exchange factor 18 (114 kDa Rho-specific guanine nucleotide exchange factor) (p114-Rho-GEF) (p114RhoGEF) (Septin-associated RhoGEF) (SA-RhoGEF)
ARID1A	O14497	1	1	AT-rich interactive domain-containing protein 1A (ARID domain-containing protein 1A) (B120) (BRG1-associated factor 250) (BAF250) (BRG1-associated factor 250a) (BAF250A) (Osa homolog 1) (hOSA1) (SWI-like protein) (SWI/SNF complex protein p270) (SWI/SNF-related, matrix-associated, actin-dependent regulator of chromatin subfamily F member 1) (hELD)
ARID1B	Q8NFD5	1	1	AT-rich interactive domain-containing protein 1B (ARID domain-containing protein 1B) (BRG1-associated factor 250b) (BAF250B) (BRG1-binding protein hELD/OSA1) (Osa homolog 2) (hOsa2) (p250R)
ARL5B	Q96KC2	1	1	ADP-ribosylation factor-like protein 5B (ADP-ribosylation factor-like protein 8)
ARL6IP1	Q15041	1	2	ADP-ribosylation factor-like protein 6-interacting protein 1 (ARL-6-interacting protein 1) (Aip-1)
ARMC1	Q9NVT9	1	1	Armadillo repeat-containing protein 1
ARPC1B	O15143	2	3	Actin-related protein 2/3 complex subunit 1B (Arp2/3 complex 41 kDa subunit) (p41-ARC)
ARPC2	O15144	4	4	Actin-related protein 2/3 complex subunit 2 (Arp2/3 complex 34 kDa subunit) (p34-ARC)
ARPC3	O15145	2	2	Actin-related protein 2/3 complex subunit 3 (Arp2/3 complex 21 kDa subunit) (p21-ARC)
ARRB2	P32121	1	1	Beta-arrestin-2 (Arrestin beta-2)
ASCC3	Q8N3C0	2	3	Activating signal cointegrator 1 complex subunit 3 (EC 3.6.4.12) (ASC-1 complex subunit p200) (ASC1p200) (Helicase, ATP binding 1) (Trip4 complex subunit p200)
ASH2L	Q9UBL3	1	1	Set1/Ash2 histone methyltransferase complex subunit ASH2 (ASH2-like protein)
ASNA1	O43681	1	1	ATPase ASNA1 (EC 3.6.-.-) (Arsenical pump-driving ATPase) (Arsenite-stimulated ATPase) (Transmembrane domain recognition complex 40 kDa ATPase subunit) (hARSA-I) (hASNA-I)
ASNS	P08243	3	3	Asparagine synthetase [glutamine-hydrolyzing] (EC 6.3.5.4) (Cell cycle control protein TS11) (Glutamine-dependent asparagine synthetase)
ASPH	Q12797	4	4	Aspartyl/asparaginyl beta-hydroxylase (EC 1.14.11.16) (Aspartate beta-hydroxylase) (ASP beta-hydroxylase) (Peptide-aspartate beta-dioxygenase)
ATAD1	Q8NBU5	1	1	ATPase family AAA domain-containing protein 1 (EC 3.6.1.3) (Thorase)
ATAD3B	Q5T9A4	1	1	ATPase family AAA domain-containing protein 3B (AAA-TOB3)
ATE1	O95260	1	1	Arginyl-tRNA--protein transferase 1 (Arginyltransferase 1) (R-transferase 1) (EC 2.3.2.8) (Arginine-tRNA--protein transferase 1)
ATG4B	Q9Y4P1	1	1	Cysteine protease ATG4B (EC 3.4.22.-) (AUT-like 1 cysteine endopeptidase) (Autophagin-1) (Autophagy-related cysteine endopeptidase 1) (Autophagy-related protein 4 homolog B) (hAPG4B)
ATIC	P31939	3	3	Bifunctional purine biosynthesis protein PURH [Includes: Phosphoribosylaminoimidazolecarboxamide formyltransferase (EC 2.1.2.3) (5-aminoimidazole-4-carboxamide ribonucleotide formyltransferase) (AICAR transformylase); IMP cyclohydrolase (EC 3.5.4.10) (ATIC) (IMP synthase) (Inosinicase)]
ATP12A	P54707	1	1	Potassium-transporting ATPase alpha chain 2 (EC 3.6.3.10) (Non-gastric H(+)/K(+) ATPase subunit alpha) (Proton pump)
ATP1A1	P05023	5	6	Sodium/potassium-transporting ATPase subunit alpha-1 (Na(+)/K(+) ATPase alpha-1 subunit) (EC 3.6.3.9) (Sodium pump subunit alpha-1)
ATP1B1	P05026	4	6	Sodium/potassium-transporting ATPase subunit beta-1 (Sodium/potassium-dependent ATPase subunit beta-1)
ATP1B3	P54709	1	1	Sodium/potassium-transporting ATPase subunit beta-3 (Sodium/potassium-dependent ATPase subunit beta-3) (ATPB-3) (CD antigen CD298)
ATP2A2	P16615	2	3	Sarcoplasmic/endoplasmic reticulum calcium ATPase 2 (SERCA2) (SR Ca(2+)-ATPase 2) (EC 3.6.3.8) (Calcium pump 2) (Calcium-transporting ATPase sarcoplasmic reticulum type, slow twitch skeletal muscle isoform) (Endoplasmic reticulum class 1/2 Ca(2+) ATPase)
ATP5B	P06576	1	1	ATP synthase subunit beta, mitochondrial (EC 3.6.3.14)
ATP5C1	P36542	1	1	ATP synthase subunit gamma, mitochondrial (F-ATPase gamma subunit)
ATP5L	O75964	1	1	ATP synthase subunit g, mitochondrial (ATPase subunit g)
ATP5O	P48047	3	5	ATP synthase subunit O, mitochondrial (Oligomycin sensitivity conferral protein) (OSCP)
ATP6V1A	P38606	3	3	V-type proton ATPase catalytic subunit A (V-ATPase subunit A) (EC 3.6.3.14) (V-ATPase 69 kDa subunit) (Vacuolar ATPase isoform VA68) (Vacuolar proton pump subunit alpha)
ATP6V1E1	P36543	3	4	V-type proton ATPase subunit E 1 (V-ATPase subunit E 1) (V-ATPase 31 kDa subunit) (p31) (Vacuolar proton pump subunit E 1)
ATP6V1H	Q9UI12	1	1	V-type proton ATPase subunit H (V-ATPase subunit H) (Nef-binding protein 1) (NBP1) (Protein VMA13 homolog) (V-ATPase 50/57 kDa subunits) (Vacuolar proton pump subunit H) (Vacuolar proton pump subunit SFD)
ATRAID	Q6UW56	1	1	All-trans retinoic acid-induced differentiation factor (Apoptosis-related protein 3) (APR-3) (p18)
ATRN	O75882	1	1	Attractin (DPPT-L) (Mahogany homolog)
ATXN10	Q9UBB4	1	1	Ataxin-10 (Brain protein E46 homolog) (Spinocerebellar ataxia type 10 protein)
ATXN2L	Q8WWM7	1	1	Ataxin-2-like protein (Ataxin-2 domain protein) (Ataxin-2-related protein)
AURKAIP1	Q9NWT8	1	1	Aurora kinase A-interacting protein (AURKA-interacting protein) (28S ribosomal protein S38, mitochondrial) (MRP-S38)
B2M	P61769	1	1	Beta-2-microglobulin [Cleaved into: Beta-2-microglobulin form pI 5.3]
B3GNT1	O43505	1	1	N-acetyllactosaminide beta-1,3-N-acetylglucosaminyltransferase (EC 2.4.1.149) (I-beta-1,3-N-acetylglucosaminyltransferase) (iGnT) (Poly-N-acetyllactosamine extension enzyme) (UDP-GlcNAc:betaGal beta-1,3-N-acetylglucosaminyltransferase 1)
BAIAP2	Q9UQB8	1	1	Brain-specific angiogenesis inhibitor 1-associated protein 2 (BAI-associated protein 2) (BAI1-associated protein 2) (Protein BAP2) (Fas ligand-associated factor 3) (FLAF3) (Insulin receptor substrate p53/p58) (IRS-58) (IRSp53/58) (Insulin receptor substrate protein of 53 kDa) (IRSp53) (Insulin receptor substrate p53)
BARD1	Q99728	1	1	BRCA1-associated RING domain protein 1 (BARD-1) (EC 6.3.2.-)
BAZ1B	Q9UIG0	1	1	Tyrosine-protein kinase BAZ1B (EC 2.7.10.2) (Bromodomain adjacent to zinc finger domain protein 1B) (Williams syndrome transcription factor) (Williams-Beuren syndrome chromosomal region 10 protein) (Williams-Beuren syndrome chromosomal region 9 protein) (hWALp2)
BCAP31	P51572	4	4	B-cell receptor-associated protein 31 (BCR-associated protein 31) (Bap31) (6C6-AG tumor-associated antigen) (Protein CDM) (p28)
BCL2L2	Q92843	1	2	Bcl-2-like protein 2 (Bcl2-L-2) (Apoptosis regulator Bcl-W)
BCLAF1	Q9NYF8	4	4	Bcl-2-associated transcription factor 1 (Btf)
BEND6	Q5SZJ8	1	1	BEN domain-containing protein 6
BMS1	Q14692	1	1	Ribosome biogenesis protein BMS1 homolog (Ribosome assembly protein BMS1 homolog)
BOD1L1	Q8NFC6	1	1	Biorientation of chromosomes in cell division protein 1-like 1 (Protein FAM44A)
BPNT1	O95861	1	1	3'(2'),5'-bisphosphate nucleotidase 1 (EC 3.1.3.7) (Bisphosphate 3'-nucleotidase 1) (PAP-inositol 1,4-phosphatase) (PIP)
BPTF	Q12830	1	1	Nucleosome-remodeling factor subunit BPTF (Bromodomain and PHD finger-containing transcription factor) (Fetal Alz-50 clone 1 protein) (Fetal Alzheimer antigen)
BRIX1	Q8TDN6	1	1	Ribosome biogenesis protein BRX1 homolog (Brix domain-containing protein 2)
BSG	P35613	1	1	Basigin (5F7) (Collagenase stimulatory factor) (Extracellular matrix metalloproteinase inducer) (EMMPRIN) (Leukocyte activation antigen M6) (OK blood group antigen) (Tumor cell-derived collagenase stimulatory factor) (TCSF) (CD antigen CD147)
BTF3	P20290	3	4	Transcription factor BTF3 (Nascent polypeptide-associated complex subunit beta) (NAC-beta) (RNA polymerase B transcription factor 3)
BTN3A1	O00481	1	1	Butyrophilin subfamily 3 member A1 (CD antigen CD277)
BUB3	O43684	1	1	Mitotic checkpoint protein BUB3
BZW1	Q7L1Q6	5	6	Basic leucine zipper and W2 domain-containing protein 1 (Protein Orf)
C10orf76	Q5T2E6	1	1	UPF0668 protein C10orf76
C12orf23	Q8WUH6	2	2	UPF0444 transmembrane protein C12orf23
C16orf80	Q9Y6A4	1	1	UPF0468 protein C16orf80 (Transcription factor IIB)
C17orf62	Q9BQA9	1	2	Uncharacterized protein C17orf62
C18orf32	Q8TCD1	1	1	UPF0729 protein C18orf32 (Putative NF-kappa-B-activating protein 200)
C19orf10	Q969H8	1	1	UPF0556 protein C19orf10 (Interleukin-25) (IL-25) (Stromal cell-derived growth factor SF20)
C19orf43	Q9BQ61	1	2	Uncharacterized protein C19orf43
C3	P01024	12	19	Complement C3 (C3 and PZP-like alpha-2-macroglobulin domain-containing protein 1) [Cleaved into: Complement C3 beta chain; Complement C3 alpha chain; C3a anaphylatoxin; Acylation stimulating protein (ASP) (C3adesArg); Complement C3b alpha' chain; Complement C3c alpha' chain fragment 1; Complement C3dg fragment; Complement C3g fragment; Complement C3d fragment; Complement C3f fragment; Complement …
C4A	P0C0L4	2	2	Complement C4-A (Acidic complement C4) (C3 and PZP-like alpha-2-macroglobulin domain-containing protein 2) [Cleaved into: Complement C4 beta chain; Complement C4-A alpha chain; C4a anaphylatoxin; C4b-A; C4d-A; Complement C4 gamma chain]
C4BPA	P04003	2	2	C4b-binding protein alpha chain (C4bp) (Proline-rich protein) (PRP)
C7orf50	Q9BRJ6	2	3	Uncharacterized protein C7orf50
C7orf55	Q96HJ9	2	2	UPF0562 protein C7orf55
C8orf59	Q8N0T1	1	1	Uncharacterized protein C8orf59
CA4	P22748	1	1	Carbonic anhydrase 4 (EC 4.2.1.1) (Carbonate dehydratase IV) (Carbonic anhydrase IV) (CA-IV)
CABIN1	Q9Y6J0	1	1	Calcineurin-binding protein cabin-1 (Calcineurin inhibitor) (CAIN)
CAD	P27708	1	1	CAD protein [Includes: Glutamine-dependent carbamoyl-phosphate synthase (EC 6.3.5.5); Aspartate carbamoyltransferase (EC 2.1.3.2); Dihydroorotase (EC 3.5.2.3)]
CALM1	P62158	1	2	Calmodulin (CaM)
CALML3	P27482	1	1	Calmodulin-like protein 3 (CaM-like protein) (CLP) (Calmodulin-related protein NB-1)
CALR	P27797	2	2	Calreticulin (CRP55) (Calregulin) (Endoplasmic reticulum resident protein 60) (ERp60) (HACBP) (grp60)
CAMK2D	Q13557	1	1	Calcium/calmodulin-dependent protein kinase type II subunit delta (CaM kinase II subunit delta) (CaMK-II subunit delta) (EC 2.7.11.17)
CAND1	Q86VP6	3	5	Cullin-associated NEDD8-dissociated protein 1 (Cullin-associated and neddylation-dissociated protein 1) (TBP-interacting protein of 120 kDa A) (TBP-interacting protein 120A) (p120 CAND1)
CANX	P27824	1	2	Calnexin (IP90) (Major histocompatibility complex class I antigen-binding protein p88) (p90)
CAP1	Q01518	4	5	Adenylyl cyclase-associated protein 1 (CAP 1)
CAPRIN1	Q14444	1	1	Caprin-1 (Cell cycle-associated protein 1) (Cytoplasmic activation- and proliferation-associated protein 1) (GPI-anchored membrane protein 1) (GPI-anchored protein p137) (GPI-p137) (p137GPI) (Membrane component chromosome 11 surface marker 1) (RNA granule protein 105)
CARS	P49589	1	1	Cysteine--tRNA ligase, cytoplasmic (EC 6.1.1.16) (Cysteinyl-tRNA synthetase) (CysRS)
CAT	P04040	1	1	Catalase (EC 1.11.1.6)
CBLL1	Q75N03	1	2	E3 ubiquitin-protein ligase Hakai (EC 6.3.2.-) (Casitas B-lineage lymphoma-transforming sequence-like protein 1) (RING finger protein 188) (c-Cbl-like protein 1)
CBX1	P83916	1	1	Chromobox protein homolog 1 (HP1Hsbeta) (Heterochromatin protein 1 homolog beta) (HP1 beta) (Heterochromatin protein p25) (M31) (Modifier 1 protein) (p25beta)
CBX5	P45973	1	2	Chromobox protein homolog 5 (Antigen p25) (Heterochromatin protein 1 homolog alpha) (HP1 alpha)
CCBL2	Q6YP21	1	1	Kynurenine--oxoglutarate transaminase 3 (EC 2.6.1.7) (Cysteine-S-conjugate beta-lyase 2) (EC 4.4.1.13) (Kynurenine aminotransferase III) (KATIII) (Kynurenine--glyoxylate transaminase) (EC 2.6.1.63) (Kynurenine--oxoglutarate transaminase III)
CCDC137	Q6PK04	1	1	Coiled-coil domain-containing protein 137
CCDC15	Q0P6D6	1	1	Coiled-coil domain-containing protein 15
CCDC59	Q9P031	1	1	Thyroid transcription factor 1-associated protein 26 (TTF-1-associated protein 26) (Coiled-coil domain-containing protein 59) (TTF-1-associated protein BR2)
CCDC86	Q9H6F5	3	3	Coiled-coil domain-containing protein 86 (Cytokine-induced protein with coiled-coil domain)
CCNA2	P20248	1	1	Cyclin-A2 (Cyclin-A)
CCNB1	P14635	2	2	G2/mitotic-specific cyclin-B1
CCNB2	O95067	1	1	G2/mitotic-specific cyclin-B2
CCNH	P51946	1	2	Cyclin-H (MO15-associated protein) (p34) (p37)
CCNK	O75909	1	1	Cyclin-K
CCT2	P78371	1	1	T-complex protein 1 subunit beta (TCP-1-beta) (CCT-beta)
CCT3	P49368	2	2	T-complex protein 1 subunit gamma (TCP-1-gamma) (CCT-gamma) (hTRiC5)
CCT4	P50991	4	4	T-complex protein 1 subunit delta (TCP-1-delta) (CCT-delta) (Stimulator of TAR RNA-binding)
CCT5	P48643	4	4	T-complex protein 1 subunit epsilon (TCP-1-epsilon) (CCT-epsilon)
CCT6A	P40227	3	3	T-complex protein 1 subunit zeta (TCP-1-zeta) (Acute morphine dependence-related protein 2) (CCT-zeta-1) (HTR3) (Tcp20)
CCT7	Q99832	4	4	T-complex protein 1 subunit eta (TCP-1-eta) (CCT-eta) (HIV-1 Nef-interacting protein)
CCT8	P50990	2	3	T-complex protein 1 subunit theta (TCP-1-theta) (CCT-theta) (Renal carcinoma antigen NY-REN-15)
CCZ1	P86791	1	1	Vacuolar fusion protein CCZ1 homolog
CD63	P08962	1	1	CD63 antigen (Granulophysin) (Lysosomal-associated membrane protein 3) (LAMP-3) (Melanoma-associated antigen ME491) (OMA81H) (Ocular melanoma-associated antigen) (Tetraspanin-30) (Tspan-30) (CD antigen CD63)
CD74	P04233	1	2	HLA class II histocompatibility antigen gamma chain (HLA-DR antigens-associated invariant chain) (Ia antigen-associated invariant chain) (Ii) (p33) (CD antigen CD74)
CDC25C	P30307	1	2	M-phase inducer phosphatase 3 (EC 3.1.3.48) (Dual specificity phosphatase Cdc25C)
CDC42	P60953	1	1	Cell division control protein 42 homolog (G25K GTP-binding protein)
CDCA8	Q53HL2	1	1	Borealin (Cell division cycle-associated protein 8) (Dasra-B) (hDasra-B) (Pluripotent embryonic stem cell-related gene 3 protein)
CDK1	P06493	2	2	Cyclin-dependent kinase 1 (CDK1) (EC 2.7.11.22) (EC 2.7.11.23) (Cell division control protein 2 homolog) (Cell division protein kinase 1) (p34 protein kinase)
CDK13	Q14004	1	2	Cyclin-dependent kinase 13 (EC 2.7.11.22) (EC 2.7.11.23) (CDC2-related protein kinase 5) (Cell division cycle 2-like protein kinase 5) (Cell division protein kinase 13) (hCDK13) (Cholinesterase-related cell division controller)
CDK8	P49336	1	1	Cyclin-dependent kinase 8 (EC 2.7.11.22) (EC 2.7.11.23) (Cell division protein kinase 8) (Mediator complex subunit CDK8) (Mediator of RNA polymerase II transcription subunit CDK8) (Protein kinase K35)
CDKN2AIP	Q9NXV6	1	1	CDKN2A-interacting protein (Collaborator of ARF)
CDV3	Q9UKY7	1	1	Protein CDV3 homolog
CEBPZ	Q03701	1	1	CCAAT/enhancer-binding protein zeta (CCAAT-box-binding transcription factor) (CBF) (CCAAT-binding factor)
CENPB	P07199	1	1	Major centromere autoantigen B (Centromere protein B) (CENP-B)
CENPF	P49454	1	1	Centromere protein F (CENP-F) (AH antigen) (Kinetochore protein CENPF) (Mitosin)
CENPM	Q9NSP4	1	2	Centromere protein M (CENP-M) (Interphase centromere complex protein 39) (Proliferation-associated nuclear element protein 1)
CEP290	O15078	1	1	Centrosomal protein of 290 kDa (Cep290) (Bardet-Biedl syndrome 14 protein) (Cancer/testis antigen 87) (CT87) (Nephrocystin-6) (Tumor antigen se2-2)
CERS5	Q8N5B7	1	1	Ceramide synthase 5 (CerS5) (EC 2.3.1.24) (LAG1 longevity assurance homolog 5)
CES2	O00748	1	1	Cocaine esterase (EC 3.1.1.84) (Carboxylesterase 2) (CE-2) (hCE-2) (EC 3.1.1.1) (Methylumbelliferyl-acetate deacetylase 2) (EC 3.1.1.56)
CFB	P00751	1	1	Complement factor B (EC 3.4.21.47) (C3/C5 convertase) (Glycine-rich beta glycoprotein) (GBG) (PBF2) (Properdin factor B) [Cleaved into: Complement factor B Ba fragment; Complement factor B Bb fragment]
CFDP1	Q9UEE9	2	2	Craniofacial development protein 1 (Bucentaur)
CFI	P05156	2	2	Complement factor I (EC 3.4.21.45) (C3B/C4B inactivator) [Cleaved into: Complement factor I heavy chain; Complement factor I light chain]
CFL1	P23528	2	2	Cofilin-1 (18 kDa phosphoprotein) (p18) (Cofilin, non-muscle isoform)
CHCHD2	Q9Y6H1	1	2	Coiled-coil-helix-coiled-coil-helix domain-containing protein 2, mitochondrial (Aging-associated gene 10 protein) (HCV NS2 trans-regulated protein) (NS2TP)
CHCHD3	Q9NX63	2	2	Coiled-coil-helix-coiled-coil-helix domain-containing protein 3, mitochondrial
CHD2	O14647	1	1	Chromodomain-helicase-DNA-binding protein 2 (CHD-2) (EC 3.6.4.12) (ATP-dependent helicase CHD2)
CHD4	Q14839	3	5	Chromodomain-helicase-DNA-binding protein 4 (CHD-4) (EC 3.6.4.12) (ATP-dependent helicase CHD4) (Mi-2 autoantigen 218 kDa protein) (Mi2-beta)
CHD7	Q9P2D1	1	1	Chromodomain-helicase-DNA-binding protein 7 (CHD-7) (EC 3.6.4.12) (ATP-dependent helicase CHD7)
CHKA	P35790	1	1	Choline kinase alpha (CK) (EC 2.7.1.32) (CHETK-alpha) (Ethanolamine kinase) (EK) (EC 2.7.1.82)
CHMP1B	Q7LBR1	1	1	Charged multivesicular body protein 1b (CHMP1.5) (Chromatin-modifying protein 1b) (CHMP1b) (Vacuolar protein sorting-associated protein 46-2) (Vps46-2) (hVps46-2)
CHMP2B	Q9UQN3	1	1	Charged multivesicular body protein 2b (CHMP2.5) (Chromatin-modifying protein 2b) (CHMP2b) (Vacuolar protein sorting-associated protein 2-2) (Vps2-2) (hVps2-2)
CHMP3	Q9Y3E7	1	1	Charged multivesicular body protein 3 (Chromatin-modifying protein 3) (Neuroendocrine differentiation factor) (Vacuolar protein sorting-associated protein 24) (hVps24)
CHORDC1	Q9UHD1	1	1	Cysteine and histidine-rich domain-containing protein 1 (CHORD domain-containing protein 1) (CHORD-containing protein 1) (CHP-1) (Protein morgana)
CIR1	Q86X95	1	1	Corepressor interacting with RBPJ 1 (CBF1-interacting corepressor) (Recepin)
CKAP4	Q07065	3	3	Cytoskeleton-associated protein 4 (63-kDa cytoskeleton-linking membrane protein) (Climp-63) (p63)
CKAP5	Q14008	4	4	Cytoskeleton-associated protein 5 (Colonic and hepatic tumor overexpressed gene protein) (Ch-TOG)
CLASP1	Q7Z460	1	1	CLIP-associating protein 1 (Cytoplasmic linker-associated protein 1) (Multiple asters homolog 1) (Protein Orbit homolog 1) (hOrbit1)
CLIC1	O00299	3	6	Chloride intracellular channel protein 1 (Chloride channel ABP) (Nuclear chloride ion channel 27) (NCC27) (Regulatory nuclear chloride ion channel protein) (hRNCC)
CLIC5	Q9NZA1	1	2	Chloride intracellular channel protein 5
CLINT1	Q14677	3	3	Clathrin interactor 1 (Clathrin-interacting protein localized in the trans-Golgi region) (Clint) (Enthoprotin) (Epsin-4) (Epsin-related protein) (EpsinR)
CLIP2	Q9UDT6	1	1	CAP-Gly domain-containing linker protein 2 (Cytoplasmic linker protein 115) (CLIP-115) (Cytoplasmic linker protein 2) (Williams-Beuren syndrome chromosomal region 3 protein) (Williams-Beuren syndrome chromosomal region 4 protein)
CLPX	O76031	2	4	ATP-dependent Clp protease ATP-binding subunit clpX-like, mitochondrial
CLTC	Q00610	2	2	Clathrin heavy chain 1 (Clathrin heavy chain on chromosome 17) (CLH-17)
CLU	P10909	1	1	Clusterin (Aging-associated gene 4 protein) (Apolipoprotein J) (Apo-J) (Complement cytolysis inhibitor) (CLI) (Complement-associated protein SP-40,40) (Ku70-binding protein 1) (NA1/NA2) (Testosterone-repressed prostate message 2) (TRPM-2) [Cleaved into: Clusterin beta chain (ApoJalpha) (Complement cytolysis inhibitor a chain); Clusterin alpha chain (ApoJbeta) (Complement cytolysis inhibitor b cha…
CNN2	Q99439	1	1	Calponin-2 (Calponin H2, smooth muscle) (Neutral calponin)
CNN3	Q15417	2	2	Calponin-3 (Calponin, acidic isoform)
CNOT1	A5YKK6	1	1	CCR4-NOT transcription complex subunit 1 (CCR4-associated factor 1) (Negative regulator of transcription subunit 1 homolog) (NOT1H) (hNOT1)
CNOT10	Q9H9A5	1	1	CCR4-NOT transcription complex subunit 10
CNP	P09543	1	1	2',3'-cyclic-nucleotide 3'-phosphodiesterase (CNP) (CNPase) (EC 3.1.4.37)
COBLL1	Q53SF7	2	3	Cordon-bleu protein-like 1
COLGALT1	Q8NBJ5	2	2	Procollagen galactosyltransferase 1 (EC 2.4.1.50) (Collagen beta(1-O)galactosyltransferase 1) (Glycosyltransferase 25 family member 1) (Hydroxylysine galactosyltransferase 1)
COPA	P53621	5	6	Coatomer subunit alpha (Alpha-coat protein) (Alpha-COP) (HEP-COP) (HEPCOP) [Cleaved into: Xenin (Xenopsin-related peptide); Proxenin]
COPB1	P53618	2	2	Coatomer subunit beta (Beta-coat protein) (Beta-COP)
COPG1	Q9Y678	1	2	Coatomer subunit gamma-1 (Gamma-1-coat protein) (Gamma-1-COP)
COPZ1	P61923	1	1	Coatomer subunit zeta-1 (Zeta-1-coat protein) (Zeta-1 COP)
COX17	Q14061	1	1	Cytochrome c oxidase copper chaperone
COX4I1	P13073	2	2	Cytochrome c oxidase subunit 4 isoform 1, mitochondrial (Cytochrome c oxidase polypeptide IV) (Cytochrome c oxidase subunit IV isoform 1) (COX IV-1)
COX5B	P10606	2	2	Cytochrome c oxidase subunit 5B, mitochondrial (Cytochrome c oxidase polypeptide Vb)
COX6C	P09669	1	1	Cytochrome c oxidase subunit 6C (Cytochrome c oxidase polypeptide VIc)
CP	P00450	1	1	Ceruloplasmin (EC 1.16.3.1) (Ferroxidase)
CPSF6	Q16630	2	2	Cleavage and polyadenylation specificity factor subunit 6 (Cleavage and polyadenylation specificity factor 68 kDa subunit) (CFIm68) (CPSF 68 kDa subunit) (Pre-mRNA cleavage factor Im 68 kDa subunit) (Protein HPBRII-4/7)
CPT2	P23786	1	1	Carnitine O-palmitoyltransferase 2, mitochondrial (EC 2.3.1.21) (Carnitine palmitoyltransferase II) (CPT II)
CR2	P20023	1	1	Complement receptor type 2 (Cr2) (Complement C3d receptor) (Epstein-Barr virus receptor) (EBV receptor) (CD antigen CD21)
CRAT	P43155	2	2	Carnitine O-acetyltransferase (Carnitine acetylase) (EC 2.3.1.7) (Carnitine acetyltransferase) (CAT) (CrAT)
CRKL	P46109	1	2	Crk-like protein
CRMP1	Q14194	1	1	Dihydropyrimidinase-related protein 1 (DRP-1) (Collapsin response mediator protein 1) (CRMP-1) (Unc-33-like phosphoprotein 3) (ULIP-3)
CRYL1	Q9Y2S2	1	1	Lambda-crystallin homolog (EC 1.1.1.45) (L-gulonate 3-dehydrogenase) (Gul3DH)
CRYZ	Q08257	1	1	Quinone oxidoreductase (EC 1.6.5.5) (NADPH:quinone reductase) (Zeta-crystallin)
CS	O75390	4	4	Citrate synthase, mitochondrial (EC 2.3.3.1)
CSDE1	O75534	2	2	Cold shock domain-containing protein E1 (N-ras upstream gene protein) (Protein UNR)
CSE1L	P55060	3	6	Exportin-2 (Exp2) (Cellular apoptosis susceptibility protein) (Chromosome segregation 1-like protein) (Importin-alpha re-exporter)
CSNK1A1	P48729	2	2	Casein kinase I isoform alpha (CKI-alpha) (EC 2.7.11.1) (CK1)
CSRP1	P21291	2	3	Cysteine and glycine-rich protein 1 (Cysteine-rich protein 1) (CRP) (CRP1)
CSTF1	Q05048	1	1	Cleavage stimulation factor subunit 1 (CF-1 50 kDa subunit) (Cleavage stimulation factor 50 kDa subunit) (CSTF 50 kDa subunit) (CstF-50)
CTGF	P29279	2	2	Connective tissue growth factor (CCN family member 2) (Hypertrophic chondrocyte-specific protein 24) (Insulin-like growth factor-binding protein 8) (IBP-8) (IGF-binding protein 8) (IGFBP-8)
CTNNA1	P35221	5	5	Catenin alpha-1 (Alpha E-catenin) (Cadherin-associated protein) (Renal carcinoma antigen NY-REN-13)
CTNNA2	P26232	1	1	Catenin alpha-2 (Alpha N-catenin) (Alpha-catenin-related protein)
CTNNAL1	Q9UBT7	1	1	Alpha-catulin (Alpha-catenin-related protein) (ACRP) (Catenin alpha-like protein 1)
CTNNB1	P35222	3	5	Catenin beta-1 (Beta-catenin)
CTNNBIP1	Q9NSA3	1	1	Beta-catenin-interacting protein 1 (Inhibitor of beta-catenin and Tcf-4)
CTNND1	O60716	2	2	Catenin delta-1 (Cadherin-associated Src substrate) (CAS) (p120 catenin) (p120(ctn)) (p120(cas))
CTPS1	P17812	1	1	CTP synthase 1 (EC 6.3.4.2) (CTP synthetase 1) (UTP--ammonia ligase 1)
CTSA	P10619	1	2	Lysosomal protective protein (EC 3.4.16.5) (Carboxypeptidase C) (Carboxypeptidase L) (Cathepsin A) (Protective protein cathepsin A) (PPCA) (Protective protein for beta-galactosidase) [Cleaved into: Lysosomal protective protein 32 kDa chain; Lysosomal protective protein 20 kDa chain]
CTSB	P07858	1	2	Cathepsin B (EC 3.4.22.1) (APP secretase) (APPS) (Cathepsin B1) [Cleaved into: Cathepsin B light chain; Cathepsin B heavy chain]
CTSC	P53634	1	1	Dipeptidyl peptidase 1 (EC 3.4.14.1) (Cathepsin C) (Cathepsin J) (Dipeptidyl peptidase I) (DPP-I) (DPPI) (Dipeptidyl transferase) [Cleaved into: Dipeptidyl peptidase 1 exclusion domain chain (Dipeptidyl peptidase I exclusion domain chain); Dipeptidyl peptidase 1 heavy chain (Dipeptidyl peptidase I heavy chain); Dipeptidyl peptidase 1 light chain (Dipeptidyl peptidase I light chain)]
CTSD	P07339	2	4	Cathepsin D (EC 3.4.23.5) [Cleaved into: Cathepsin D light chain; Cathepsin D heavy chain]
CTSH	P09668	1	1	Pro-cathepsin H [Cleaved into: Cathepsin H mini chain; Cathepsin H (EC 3.4.22.16); Cathepsin H heavy chain; Cathepsin H light chain]
CUL1	Q13616	2	2	Cullin-1 (CUL-1)
CUL2	Q13617	2	2	Cullin-2 (CUL-2)
CUL3	Q13618	2	3	Cullin-3 (CUL-3)
CUL4B	Q13620	3	3	Cullin-4B (CUL-4B)
CUL7	Q14999	1	2	Cullin-7 (CUL-7)
CWC15	Q9P013	1	1	Spliceosome-associated protein CWC15 homolog
CYP27A1	Q02318	2	2	Sterol 26-hydroxylase, mitochondrial (EC 1.14.13.15) (5-beta-cholestane-3-alpha,7-alpha,12-alpha-triol 27-hydroxylase) (Cytochrome P-450C27/25) (Cytochrome P450 27) (Sterol 27-hydroxylase) (Vitamin D(3) 25-hydroxylase)
CYP3A7	P24462	1	1	Cytochrome P450 3A7 (EC 1.14.14.1) (CYPIIIA7) (Cytochrome P450-HFLA)
CYP51A1	Q16850	2	2	Lanosterol 14-alpha demethylase (LDM) (EC 1.14.13.70) (CYPLI) (Cytochrome P450 51A1) (Cytochrome P450-14DM) (Cytochrome P45014DM) (Cytochrome P450LI) (Sterol 14-alpha demethylase)
CYR61	O00622	1	1	Protein CYR61 (CCN family member 1) (Cysteine-rich angiogenic inducer 61) (Insulin-like growth factor-binding protein 10) (IBP-10) (IGF-binding protein 10) (IGFBP-10) (Protein GIG1)
D2HGDH	Q8N465	1	1	D-2-hydroxyglutarate dehydrogenase, mitochondrial (EC 1.1.99.-)
DAAM1	Q9Y4D1	1	1	Disheveled-associated activator of morphogenesis 1
DAK	Q3LXA3	2	2	Bifunctional ATP-dependent dihydroxyacetone kinase/FAD-AMP lyase (cyclizing) [Includes: ATP-dependent dihydroxyacetone kinase (DHA kinase) (EC 2.7.1.28) (EC 2.7.1.29) (Glycerone kinase) (Triokinase) (Triose kinase); FAD-AMP lyase (cyclizing) (EC 4.6.1.15) (FAD-AMP lyase (cyclic FMN forming)) (FMN cyclase)]
DARS	P14868	2	3	Aspartate--tRNA ligase, cytoplasmic (EC 6.1.1.12) (Aspartyl-tRNA synthetase) (AspRS) (Cell proliferation-inducing gene 40 protein)
DBI	P07108	1	1	Acyl-CoA-binding protein (ACBP) (Diazepam-binding inhibitor) (DBI) (Endozepine) (EP)
DCAF8	Q5TAQ9	1	1	DDB1- and CUL4-associated factor 8 (WD repeat-containing protein 42A)
DCTD	P32321	1	1	Deoxycytidylate deaminase (EC 3.5.4.12) (dCMP deaminase)
DCUN1D2	Q6PH85	1	1	DCN1-like protein 2 (DCUN1 domain-containing protein 2) (Defective in cullin neddylation protein 1-like protein 2)
DCXR	Q7Z4W1	2	3	L-xylulose reductase (XR) (EC 1.1.1.10) (Carbonyl reductase II) (Dicarbonyl/L-xylulose reductase) (Kidney dicarbonyl reductase) (kiDCR) (Sperm surface protein P34H)
DDB2	Q92466	2	3	DNA damage-binding protein 2 (DDB p48 subunit) (DDBb) (Damage-specific DNA-binding protein 2) (UV-damaged DNA-binding protein 2) (UV-DDB 2)
DDOST	P39656	3	5	Dolichyl-diphosphooligosaccharide--protein glycosyltransferase 48 kDa subunit (DDOST 48 kDa subunit) (Oligosaccharyl transferase 48 kDa subunit) (EC 2.4.99.18)
DDX1	Q92499	4	7	ATP-dependent RNA helicase DDX1 (EC 3.6.4.13) (DEAD box protein 1) (DEAD box protein retinoblastoma) (DBP-RB)
DDX17	Q92841	4	5	Probable ATP-dependent RNA helicase DDX17 (EC 3.6.4.13) (DEAD box protein 17) (DEAD box protein p72) (RNA-dependent helicase p72)
DDX18	Q9NVP1	2	2	ATP-dependent RNA helicase DDX18 (EC 3.6.4.13) (DEAD box protein 18) (Myc-regulated DEAD box protein) (MrDb)
DDX21	Q9NR30	7	10	Nucleolar RNA helicase 2 (EC 3.6.4.13) (DEAD box protein 21) (Gu-alpha) (Nucleolar RNA helicase Gu) (Nucleolar RNA helicase II) (RH II/Gu)
DDX23	Q9BUQ8	1	1	Probable ATP-dependent RNA helicase DDX23 (EC 3.6.4.13) (100 kDa U5 snRNP-specific protein) (DEAD box protein 23) (PRP28 homolog) (U5-100kD)
DDX24	Q9GZR7	5	7	ATP-dependent RNA helicase DDX24 (EC 3.6.4.13) (DEAD box protein 24)
DDX27	Q96GQ7	1	1	Probable ATP-dependent RNA helicase DDX27 (EC 3.6.4.13) (DEAD box protein 27)
DDX39A	O00148	1	1	ATP-dependent RNA helicase DDX39A (EC 3.6.4.13) (DEAD box protein 39) (Nuclear RNA helicase URH49)
DDX3X	O00571	1	1	ATP-dependent RNA helicase DDX3X (EC 3.6.4.13) (DEAD box protein 3, X-chromosomal) (DEAD box, X isoform) (Helicase-like protein 2) (HLP2)
DDX41	Q9UJV9	4	4	Probable ATP-dependent RNA helicase DDX41 (EC 3.6.4.13) (DEAD box protein 41) (DEAD box protein abstrakt homolog)
DDX42	Q86XP3	2	2	ATP-dependent RNA helicase DDX42 (EC 3.6.4.13) (DEAD box protein 42) (RNA helicase-like protein) (RHELP) (RNA helicase-related protein) (RNAHP) (SF3b DEAD box protein) (Splicing factor 3B-associated 125 kDa protein) (SF3b125)
DDX46	Q7L014	4	4	Probable ATP-dependent RNA helicase DDX46 (EC 3.6.4.13) (DEAD box protein 46) (PRP5 homolog)
DDX5	P17844	1	1	Probable ATP-dependent RNA helicase DDX5 (EC 3.6.4.13) (DEAD box protein 5) (RNA helicase p68)
DDX56	Q9NY93	2	2	Probable ATP-dependent RNA helicase DDX56 (EC 3.6.4.13) (ATP-dependent 61 kDa nucleolar RNA helicase) (DEAD box protein 21) (DEAD box protein 56)
DDX6	P26196	2	2	Probable ATP-dependent RNA helicase DDX6 (EC 3.6.4.13) (ATP-dependent RNA helicase p54) (DEAD box protein 6) (Oncogene RCK)
DECR1	Q16698	2	2	2,4-dienoyl-CoA reductase, mitochondrial (EC 1.3.1.34) (2,4-dienoyl-CoA reductase [NADPH]) (4-enoyl-CoA reductase [NADPH])
DEK	P35659	2	2	Protein DEK
DENND4A	Q7Z401	1	1	C-myc promoter-binding protein (DENN domain-containing protein 4A)
DERA	Q9Y315	1	1	Putative deoxyribose-phosphate aldolase (DERA) (EC 4.1.2.4) (2-deoxy-D-ribose 5-phosphate aldolase) (Phosphodeoxyriboaldolase) (Deoxyriboaldolase)
DHCR24	Q15392	1	3	Delta(24)-sterol reductase (EC 1.3.1.72) (24-dehydrocholesterol reductase) (3-beta-hydroxysterol delta-24-reductase) (Diminuto/dwarf1 homolog) (Seladin-1)
DHCR7	Q9UBM7	1	1	7-dehydrocholesterol reductase (7-DHC reductase) (EC 1.3.1.21) (Putative sterol reductase SR-2) (Sterol Delta(7)-reductase)
DHRS2	Q13268	3	3	Dehydrogenase/reductase SDR family member 2, mitochondrial (EC 1.1.1.-) (Dicarbonyl reductase HEP27) (Protein D)
DHRS3	O75911	1	1	Short-chain dehydrogenase/reductase 3 (EC 1.1.1.300) (DD83.1) (Retinal short-chain dehydrogenase/reductase 1) (retSDR1)
DHRS7B	Q6IAN0	1	1	Dehydrogenase/reductase SDR family member 7B (EC 1.1.-.-)
DHX30	Q7L2E3	3	3	Putative ATP-dependent RNA helicase DHX30 (EC 3.6.4.13) (DEAH box protein 30)
DHX37	Q8IY37	1	2	Probable ATP-dependent RNA helicase DHX37 (EC 3.6.4.13) (DEAH box protein 37)
DHX38	Q92620	1	1	Pre-mRNA-splicing factor ATP-dependent RNA helicase PRP16 (EC 3.6.4.13) (ATP-dependent RNA helicase DHX38) (DEAH box protein 38)
DHX8	Q14562	1	1	ATP-dependent RNA helicase DHX8 (EC 3.6.4.13) (DEAH box protein 8) (RNA helicase HRH1)
DHX9	Q08211	2	2	ATP-dependent RNA helicase A (RHA) (EC 3.6.4.13) (DEAH box protein 9) (Leukophysin) (LKP) (Nuclear DNA helicase II) (NDH II)
DICER1	Q9UPY3	1	1	Endoribonuclease Dicer (EC 3.1.26.3) (Helicase with RNase motif) (Helicase MOI)
DIDO1	Q9BTC0	1	1	Death-inducer obliterator 1 (DIO-1) (hDido1) (Death-associated transcription factor 1) (DATF-1)
DIP2B	Q9P265	3	4	Disco-interacting protein 2 homolog B (DIP2 homolog B)
DKC1	O60832	2	2	H/ACA ribonucleoprotein complex subunit 4 (EC 5.4.99.-) (CBF5 homolog) (Dyskerin) (Nopp140-associated protein of 57 kDa) (Nucleolar protein NAP57) (Nucleolar protein family A member 4) (snoRNP protein DKC1)
DLST	P36957	1	1	Dihydrolipoyllysine-residue succinyltransferase component of 2-oxoglutarate dehydrogenase complex, mitochondrial (EC 2.3.1.61) (2-oxoglutarate dehydrogenase complex component E2) (OGDC-E2) (Dihydrolipoamide succinyltransferase component of 2-oxoglutarate dehydrogenase complex) (E2K)
DNAJA1	P31689	2	2	DnaJ homolog subfamily A member 1 (DnaJ protein homolog 2) (HSDJ) (Heat shock 40 kDa protein 4) (Heat shock protein J2) (HSJ-2) (Human DnaJ protein 2) (hDj-2)
DNAJA2	O60884	3	4	DnaJ homolog subfamily A member 2 (Cell cycle progression restoration gene 3 protein) (Dnj3) (Dj3) (HIRA-interacting protein 4) (Renal carcinoma antigen NY-REN-14)
DNAJA3	Q96EY1	3	4	DnaJ homolog subfamily A member 3, mitochondrial (DnaJ protein Tid-1) (hTid-1) (Hepatocellular carcinoma-associated antigen 57) (Tumorous imaginal discs protein Tid56 homolog)
DNAJB1	P25685	2	2	DnaJ homolog subfamily B member 1 (DnaJ protein homolog 1) (Heat shock 40 kDa protein 1) (HSP40) (Heat shock protein 40) (Human DnaJ protein 1) (hDj-1)
DNAJB11	Q9UBS4	2	2	DnaJ homolog subfamily B member 11 (APOBEC1-binding protein 2) (ABBP-2) (DnaJ protein homolog 9) (ER-associated DNAJ) (ER-associated Hsp40 co-chaperone) (Endoplasmic reticulum DNA J domain-containing protein 3) (ER-resident protein ERdj3) (ERdj3) (ERj3p) (HEDJ) (Human DnaJ protein 9) (hDj-9) (PWP1-interacting protein 4)
DNAJB12	Q9NXW2	1	1	DnaJ homolog subfamily B member 12
DNAJB14	Q8TBM8	1	1	DnaJ homolog subfamily B member 14
DNAJC11	Q9NVH1	1	1	DnaJ homolog subfamily C member 11
DNAJC19	Q96DA6	1	1	Mitochondrial import inner membrane translocase subunit TIM14 (DnaJ homolog subfamily C member 19)
DNAJC9	Q8WXX5	1	1	DnaJ homolog subfamily C member 9 (DnaJ protein SB73)
DNM2	P50570	3	3	Dynamin-2 (EC 3.6.5.5)
DNMT1	P26358	2	2	DNA (cytosine-5)-methyltransferase 1 (Dnmt1) (EC 2.1.1.37) (CXXC-type zinc finger protein 9) (DNA methyltransferase HsaI) (DNA MTase HsaI) (M.HsaI) (MCMT)
DNTTIP2	Q5QJE6	1	1	Deoxynucleotidyltransferase terminal-interacting protein 2 (Estrogen receptor-binding protein) (LPTS-interacting protein 2) (LPTS-RP2) (Terminal deoxynucleotidyltransferase-interacting factor 2) (TdIF2) (TdT-interacting factor 2)
DOCK3	Q8IZD9	1	1	Dedicator of cytokinesis protein 3 (Modifier of cell adhesion) (Presenilin-binding protein) (PBP)
DPP9	Q86TI2	1	1	Dipeptidyl peptidase 9 (DP9) (EC 3.4.14.5) (Dipeptidyl peptidase IV-related protein 2) (DPRP-2) (Dipeptidyl peptidase IX) (DPP IX) (Dipeptidyl peptidase-like protein 9) (DPLP9)
DSG2	Q14126	1	1	Desmoglein-2 (Cadherin family member 5) (HDGC)
DSP	P15924	9	10	Desmoplakin (DP) (250/210 kDa paraneoplastic pemphigus antigen)
DSTN	P60981	1	1	Destrin (Actin-depolymerizing factor) (ADF)
DVL3	Q92997	1	1	Segment polarity protein dishevelled homolog DVL-3 (Dishevelled-3) (DSH homolog 3)
DYNC1H1	Q14204	2	2	Cytoplasmic dynein 1 heavy chain 1 (Cytoplasmic dynein heavy chain 1) (Dynein heavy chain, cytosolic)
DYNC1I2	Q13409	2	2	Cytoplasmic dynein 1 intermediate chain 2 (Cytoplasmic dynein intermediate chain 2) (Dynein intermediate chain 2, cytosolic) (DH IC-2)
DYNLL2	Q96FJ2	1	1	Dynein light chain 2, cytoplasmic (8 kDa dynein light chain b) (DLC8b) (Dynein light chain LC8-type 2)
ECH1	Q13011	1	1	Delta(3,5)-Delta(2,4)-dienoyl-CoA isomerase, mitochondrial (EC 5.3.3.-)
ECHDC1	Q9NTX5	1	1	Ethylmalonyl-CoA decarboxylase (EC 4.1.1.94) (Enoyl-CoA hydratase domain-containing protein 1) (Methylmalonyl-CoA decarboxylase) (MMCD) (EC 4.1.1.41)
ECHS1	P30084	3	3	Enoyl-CoA hydratase, mitochondrial (EC 4.2.1.17) (Enoyl-CoA hydratase 1) (Short-chain enoyl-CoA hydratase) (SCEH)
ECI2	O75521	3	3	Enoyl-CoA delta isomerase 2, mitochondrial (EC 5.3.3.8) (DRS-1) (Delta(3),delta(2)-enoyl-CoA isomerase) (D3,D2-enoyl-CoA isomerase) (Diazepam-binding inhibitor-related protein 1) (DBI-related protein 1) (Dodecenoyl-CoA isomerase) (Hepatocellular carcinoma-associated antigen 88) (Peroxisomal 3,2-trans-enoyl-CoA isomerase) (pECI) (Renal carcinoma antigen NY-REN-1)
ECM29	Q5VYK3	1	1	Proteasome-associated protein ECM29 homolog (Ecm29)
EEF1A1P5	Q5VTE0	4	6	Putative elongation factor 1-alpha-like 3 (EF-1-alpha-like 3) (Eukaryotic elongation factor 1 A-like 3) (eEF1A-like 3) (Eukaryotic translation elongation factor 1 alpha-1 pseudogene 5)
EEF1A2	Q05639	3	5	Elongation factor 1-alpha 2 (EF-1-alpha-2) (Eukaryotic elongation factor 1 A-2) (eEF1A-2) (Statin-S1)
EEF1B2	P24534	1	1	Elongation factor 1-beta (EF-1-beta)
EEF1D	P29692	1	1	Elongation factor 1-delta (EF-1-delta) (Antigen NY-CO-4)
EEF2	P13639	8	10	Elongation factor 2 (EF-2)
EFHD2	Q96C19	2	2	EF-hand domain-containing protein D2 (Swiprosin-1)
EFTUD2	Q15029	1	1	116 kDa U5 small nuclear ribonucleoprotein component (Elongation factor Tu GTP-binding domain-containing protein 2) (SNU114 homolog) (hSNU114) (U5 snRNP-specific protein, 116 kDa) (U5-116 kDa)
EHBP1	Q8NDI1	1	1	EH domain-binding protein 1
EHHADH	Q08426	2	3	Peroxisomal bifunctional enzyme (PBE) (PBFE) [Includes: Enoyl-CoA hydratase/3,2-trans-enoyl-CoA isomerase (EC 4.2.1.17) (EC 5.3.3.8); 3-hydroxyacyl-CoA dehydrogenase (EC 1.1.1.35)]
EIF1AX	P47813	3	3	Eukaryotic translation initiation factor 1A, X-chromosomal (eIF-1A X isoform) (Eukaryotic translation initiation factor 4C) (eIF-4C)
EIF2A	Q9BY44	1	1	Eukaryotic translation initiation factor 2A (eIF-2A) (65 kDa eukaryotic translation initiation factor 2A) [Cleaved into: Eukaryotic translation initiation factor 2A, N-terminally processed]
EIF2S2	P20042	5	7	Eukaryotic translation initiation factor 2 subunit 2 (Eukaryotic translation initiation factor 2 subunit beta) (eIF-2-beta)
EIF3CL	B5ME19	1	1	Eukaryotic translation initiation factor 3 subunit C-like protein
EIF3E	P60228	3	3	Eukaryotic translation initiation factor 3 subunit E (eIF3e) (Eukaryotic translation initiation factor 3 subunit 6) (Viral integration site protein INT-6 homolog) (eIF-3 p48)
EIF3G	O75821	1	1	Eukaryotic translation initiation factor 3 subunit G (eIF3g) (Eukaryotic translation initiation factor 3 RNA-binding subunit) (eIF-3 RNA-binding subunit) (Eukaryotic translation initiation factor 3 subunit 4) (eIF-3-delta) (eIF3 p42) (eIF3 p44)
EIF3H	O15372	1	1	Eukaryotic translation initiation factor 3 subunit H (eIF3h) (Eukaryotic translation initiation factor 3 subunit 3) (eIF-3-gamma) (eIF3 p40 subunit)
EIF3L	Q9Y262	1	2	Eukaryotic translation initiation factor 3 subunit L (eIF3l) (Eukaryotic translation initiation factor 3 subunit 6-interacting protein) (Eukaryotic translation initiation factor 3 subunit E-interacting protein)
EIF4A1	P60842	1	3	Eukaryotic initiation factor 4A-I (eIF-4A-I) (eIF4A-I) (EC 3.6.4.13) (ATP-dependent RNA helicase eIF4A-1)
EIF4A2	Q14240	1	1	Eukaryotic initiation factor 4A-II (eIF-4A-II) (eIF4A-II) (EC 3.6.4.13) (ATP-dependent RNA helicase eIF4A-2)
EIF4A3	P38919	3	3	Eukaryotic initiation factor 4A-III (eIF-4A-III) (eIF4A-III) (EC 3.6.4.13) (ATP-dependent RNA helicase DDX48) (ATP-dependent RNA helicase eIF4A-3) (DEAD box protein 48) (Eukaryotic initiation factor 4A-like NUK-34) (Eukaryotic translation initiation factor 4A isoform 3) (Nuclear matrix protein 265) (NMP 265) (hNMP 265) [Cleaved into: Eukaryotic initiation factor 4A-III, N-terminally processed]
EIF4B	P23588	2	2	Eukaryotic translation initiation factor 4B (eIF-4B)
EIF4E2	O60573	1	1	Eukaryotic translation initiation factor 4E type 2 (eIF-4E type 2) (eIF4E type 2) (Eukaryotic translation initiation factor 4E homologous protein) (Eukaryotic translation initiation factor 4E-like 3) (eIF4E-like protein 4E-LP) (mRNA cap-binding protein 4EHP) (mRNA cap-binding protein type 3)
EIF4G1	Q04637	2	3	Eukaryotic translation initiation factor 4 gamma 1 (eIF-4-gamma 1) (eIF-4G 1) (eIF-4G1) (p220)
EIF4G2	P78344	3	4	Eukaryotic translation initiation factor 4 gamma 2 (eIF-4-gamma 2) (eIF-4G 2) (eIF4G 2) (Death-associated protein 5) (DAP-5) (p97)
EIF5	P55010	2	2	Eukaryotic translation initiation factor 5 (eIF-5)
EIF5B	O60841	4	4	Eukaryotic translation initiation factor 5B (eIF-5B) (Translation initiation factor IF-2)
ELAC2	Q9BQ52	1	1	Zinc phosphodiesterase ELAC protein 2 (EC 3.1.26.11) (ElaC homolog protein 2) (Heredity prostate cancer protein 2) (Ribonuclease Z 2) (RNase Z 2) (tRNA 3 endonuclease 2) (tRNase Z 2)
ELAVL1	Q15717	1	1	ELAV-like protein 1 (Hu-antigen R) (HuR)
ELMOD2	Q8IZ81	1	1	ELMO domain-containing protein 2
ELP3	Q9H9T3	1	1	Elongator complex protein 3 (hELP3) (EC 2.3.1.48)
EMC8	O43402	1	1	ER membrane protein complex subunit 8 (Neighbor of COX4) (Protein FAM158B)
EMG1	Q92979	1	1	Ribosomal RNA small subunit methyltransferase NEP1 (EC 2.1.1.-) (18S rRNA (pseudouridine-N1-)-methyltransferase NEP1) (18S rRNA Psi1248 methyltransferase) (Nucleolar protein EMG1 homolog) (Protein C2f) (Ribosome biogenesis protein NEP1)
EML4	Q9HC35	2	2	Echinoderm microtubule-associated protein-like 4 (EMAP-4) (Restrictedly overexpressed proliferation-associated protein) (Ropp 120)
EML5	Q05BV3	1	1	Echinoderm microtubule-associated protein-like 5 (EMAP-5)
ENO1	P06733	8	14	Alpha-enolase (EC 4.2.1.11) (2-phospho-D-glycerate hydro-lyase) (C-myc promoter-binding protein) (Enolase 1) (MBP-1) (MPB-1) (Non-neural enolase) (NNE) (Phosphopyruvate hydratase) (Plasminogen-binding protein)
ENO3	P13929	2	4	Beta-enolase (EC 4.2.1.11) (2-phospho-D-glycerate hydro-lyase) (Enolase 3) (Muscle-specific enolase) (MSE) (Skeletal muscle enolase)
ENSA	O43768	1	1	Alpha-endosulfine (ARPP-19e)
EPB41L2	O43491	6	8	Band 4.1-like protein 2 (Generally expressed protein 4.1) (4.1G)
EPB41L3	Q9Y2J2	1	1	Band 4.1-like protein 3 (4.1B) (Differentially expressed in adenocarcinoma of the lung protein 1) (DAL-1) [Cleaved into: Band 4.1-like protein 3, N-terminally processed]
EPHX1	P07099	2	2	Epoxide hydrolase 1 (EC 3.3.2.9) (Epoxide hydratase) (Microsomal epoxide hydrolase)
EPN1	Q9Y6I3	1	1	Epsin-1 (EH domain-binding mitotic phosphoprotein) (EPS-15-interacting protein 1)
EPRS	P07814	4	7	Bifunctional glutamate/proline--tRNA ligase (Bifunctional aminoacyl-tRNA synthetase) (Cell proliferation-inducing gene 32 protein) (Glutamatyl-prolyl-tRNA synthetase) [Includes: Glutamate--tRNA ligase (EC 6.1.1.17) (Glutamyl-tRNA synthetase) (GluRS); Proline--tRNA ligase (EC 6.1.1.15) (Prolyl-tRNA synthetase)]
EPS8L2	Q9H6S3	1	3	Epidermal growth factor receptor kinase substrate 8-like protein 2 (EPS8-like protein 2) (Epidermal growth factor receptor pathway substrate 8-related protein 2) (EPS8-related protein 2)
ERBB3	P21860	2	3	Receptor tyrosine-protein kinase erbB-3 (EC 2.7.10.1) (Proto-oncogene-like protein c-ErbB-3) (Tyrosine kinase-type cell surface receptor HER3)
ERGIC1	Q969X5	1	1	Endoplasmic reticulum-Golgi intermediate compartment protein 1 (ER-Golgi intermediate compartment 32 kDa protein) (ERGIC-32)
ERLIN2	O94905	1	1	Erlin-2 (Endoplasmic reticulum lipid raft-associated protein 2) (Stomatin-prohibitin-flotillin-HflC/K domain-containing protein 2) (SPFH domain-containing protein 2)
ERO1L	Q96HE7	2	2	ERO1-like protein alpha (ERO1-L) (ERO1-L-alpha) (EC 1.8.4.-) (Endoplasmic oxidoreductin-1-like protein) (Oxidoreductin-1-L-alpha)
ERP29	P30040	1	2	Endoplasmic reticulum resident protein 29 (ERp29) (Endoplasmic reticulum resident protein 28) (ERp28) (Endoplasmic reticulum resident protein 31) (ERp31)
ERP44	Q9BS26	1	1	Endoplasmic reticulum resident protein 44 (ER protein 44) (ERp44) (Thioredoxin domain-containing protein 4)
ESD	P10768	2	2	S-formylglutathione hydrolase (FGH) (EC 3.1.2.12) (Esterase D) (Methylumbelliferyl-acetate deacetylase) (EC 3.1.1.56)
ESF1	Q9H501	4	4	ESF1 homolog (ABT1-associated protein)
ESRRA	P11474	1	1	Steroid hormone receptor ERR1 (Estrogen receptor-like 1) (Estrogen-related receptor alpha) (ERR-alpha) (Nuclear receptor subfamily 3 group B member 1)
ETF1	P62495	1	1	Eukaryotic peptide chain release factor subunit 1 (Eukaryotic release factor 1) (eRF1) (Protein Cl1) (TB3-1)
ETFB	P38117	1	1	Electron transfer flavoprotein subunit beta (Beta-ETF)
EVPL	Q92817	1	2	Envoplakin (210 kDa cornified envelope precursor protein) (210 kDa paraneoplastic pemphigus antigen) (p210)
EWSR1	Q01844	2	2	RNA-binding protein EWS (EWS oncogene) (Ewing sarcoma breakpoint region 1 protein)
EXOSC10	Q01780	2	2	Exosome component 10 (EC 3.1.13.-) (Autoantigen PM/Scl 2) (P100 polymyositis-scleroderma overlap syndrome-associated autoantigen) (Polymyositis/scleroderma autoantigen 100 kDa) (PM/Scl-100) (Polymyositis/scleroderma autoantigen 2)
EZR	P15311	3	5	Ezrin (Cytovillin) (Villin-2) (p81)
F5	P12259	1	1	Coagulation factor V (Activated protein C cofactor) (Proaccelerin, labile factor) [Cleaved into: Coagulation factor V heavy chain; Coagulation factor V light chain]
FABP1	P07148	2	4	Fatty acid-binding protein, liver (Fatty acid-binding protein 1) (Liver-type fatty acid-binding protein) (L-FABP)
FADS2	O95864	2	2	Fatty acid desaturase 2 (EC 1.14.19.-) (Delta(6) fatty acid desaturase) (D6D) (Delta(6) desaturase) (Delta-6 desaturase)
FAF1	Q9UNN5	1	1	FAS-associated factor 1 (hFAF1) (UBX domain-containing protein 12) (UBX domain-containing protein 3A)
FAHD1	Q6P587	1	1	Acylpyruvase FAHD1, mitochondrial (EC 3.7.1.5) (Fumarylacetoacetate hydrolase domain-containing protein 1) (YisK-like protein)
FAM115A	Q9Y4C2	3	3	Protein FAM115A
FAM134C	Q86VR2	1	1	Protein FAM134C
FAM169A	Q9Y6X4	1	1	Soluble lamin-associated protein of 75 kDa (SLAP75) (Protein FAM169A)
FAM192A	Q9GZU8	1	1	Protein FAM192A (NEFA-interacting nuclear protein NIP30)
FAM213A	Q9BRX8	2	2	Redox-regulatory protein FAM213A (Peroxiredoxin-like 2 activated in M-CSF stimulated monocytes) (Protein PAMM)
FAM50A	Q14320	1	1	Protein FAM50A (Protein HXC-26) (Protein XAP-5)
FANCI	Q9NVI1	1	2	Fanconi anemia group I protein (Protein FACI)
FARP1	Q9Y4F1	3	4	FERM, RhoGEF and pleckstrin domain-containing protein 1 (Chondrocyte-derived ezrin-like protein) (Pleckstrin homology domain-containing family C member 2) (PH domain-containing family C member 2)
FASN	P49327	5	8	Fatty acid synthase (EC 2.3.1.85) [Includes: [Acyl-carrier-protein] S-acetyltransferase (EC 2.3.1.38); [Acyl-carrier-protein] S-malonyltransferase (EC 2.3.1.39); 3-oxoacyl-[acyl-carrier-protein] synthase (EC 2.3.1.41); 3-oxoacyl-[acyl-carrier-protein] reductase (EC 1.1.1.100); 3-hydroxyacyl-[acyl-carrier-protein] dehydratase (EC 4.2.1.59); Enoyl-[acyl-carrier-protein] reductase (EC 1.3.1.39); Ole…
FBXO22	Q8NEZ5	1	1	F-box only protein 22 (F-box protein FBX22p44)
FBXO5	Q9UKT4	1	1	F-box only protein 5 (Early mitotic inhibitor 1)
FDFT1	P37268	2	3	Squalene synthase (SQS) (SS) (EC 2.5.1.21) (FPP:FPP farnesyltransferase) (Farnesyl-diphosphate farnesyltransferase)
FDPS	P14324	2	3	Farnesyl pyrophosphate synthase (FPP synthase) (FPS) (EC 2.5.1.10) ((2E,6E)-farnesyl diphosphate synthase) (Dimethylallyltranstransferase) (EC 2.5.1.1) (Farnesyl diphosphate synthase) (Geranyltranstransferase)
FERMT2	Q96AC1	2	2	Fermitin family homolog 2 (Kindlin-2) (Mitogen-inducible gene 2 protein) (MIG-2) (Pleckstrin homology domain-containing family C member 1) (PH domain-containing family C member 1)
FGA	P02671	1	1	Fibrinogen alpha chain [Cleaved into: Fibrinopeptide A; Fibrinogen alpha chain]
FGB	P02675	2	2	Fibrinogen beta chain [Cleaved into: Fibrinopeptide B; Fibrinogen beta chain]
FGG	P02679	2	3	Fibrinogen gamma chain
FH	P07954	1	1	Fumarate hydratase, mitochondrial (Fumarase) (EC 4.2.1.2)
FKBP4	Q02790	1	1	Peptidyl-prolyl cis-trans isomerase FKBP4 (PPIase FKBP4) (EC 5.2.1.8) (51 kDa FK506-binding protein) (FKBP51) (52 kDa FK506-binding protein) (52 kDa FKBP) (FKBP-52) (59 kDa immunophilin) (p59) (FK506-binding protein 4) (FKBP-4) (FKBP59) (HSP-binding immunophilin) (HBI) (Immunophilin FKBP52) (Rotamase) [Cleaved into: Peptidyl-prolyl cis-trans isomerase FKBP4, N-terminally processed]
FLII	Q13045	2	2	Protein flightless-1 homolog
FLNA	P21333	4	4	Filamin-A (FLN-A) (Actin-binding protein 280) (ABP-280) (Alpha-filamin) (Endothelial actin-binding protein) (Filamin-1) (Non-muscle filamin)
FLNB	O75369	12	15	Filamin-B (FLN-B) (ABP-278) (ABP-280 homolog) (Actin-binding-like protein) (Beta-filamin) (Filamin homolog 1) (Fh1) (Filamin-3) (Thyroid autoantigen) (Truncated actin-binding protein) (Truncated ABP)
FLNC	Q14315	3	3	Filamin-C (FLN-C) (FLNc) (ABP-280-like protein) (ABP-L) (Actin-binding-like protein) (Filamin-2) (Gamma-filamin)
FLOT1	O75955	1	1	Flotillin-1
FMNL2	Q96PY5	1	1	Formin-like protein 2 (Formin homology 2 domain-containing protein 2)
FN1	P02751	3	4	Fibronectin (FN) (Cold-insoluble globulin) (CIG) [Cleaved into: Anastellin; Ugl-Y1; Ugl-Y2; Ugl-Y3]
FNDC3A	Q9Y2H6	1	1	Fibronectin type-III domain-containing protein 3A (Human gene expressed in odontoblasts)
FOXK2	Q01167	1	1	Forkhead box protein K2 (Cellular transcription factor ILF-1) (FOXK1) (Interleukin enhancer-binding factor 1)
FOXP4	Q8IVH2	1	1	Forkhead box protein P4 (Fork head-related protein-like A)
FSCN1	Q16658	1	1	Fascin (55 kDa actin-bundling protein) (Singed-like protein) (p55)
FTSJ3	Q8IY81	1	1	pre-rRNA processing protein FTSJ3 (EC 2.1.1.-) (2'-O-ribose RNA methyltransferase SPB1 homolog) (Protein ftsJ homolog 3) (Putative rRNA methyltransferase 3)
FUBP1	Q96AE4	1	1	Far upstream element-binding protein 1 (FBP) (FUSE-binding protein 1) (DNA helicase V) (hDH V)
FUCA1	P04066	1	1	Tissue alpha-L-fucosidase (EC 3.2.1.51) (Alpha-L-fucosidase I) (Alpha-L-fucoside fucohydrolase 1) (Alpha-L-fucosidase 1)
GAK	O14976	1	1	Cyclin-G-associated kinase (EC 2.7.11.1)
GANAB	Q14697	2	4	Neutral alpha-glucosidase AB (EC 3.2.1.84) (Alpha-glucosidase 2) (Glucosidase II subunit alpha)
GAPDH	P04406	6	14	Glyceraldehyde-3-phosphate dehydrogenase (GAPDH) (EC 1.2.1.12) (Peptidyl-cysteine S-nitrosylase GAPDH) (EC 2.6.99.-)
GARS	P41250	3	5	Glycine--tRNA ligase (EC 6.1.1.14) (Diadenosine tetraphosphate synthetase) (AP-4-A synthetase) (Glycyl-tRNA synthetase) (GlyRS)
GBAS	O75323	1	2	Protein NipSnap homolog 2 (NipSnap2) (Glioblastoma-amplified sequence)
GBE1	Q04446	1	1	1,4-alpha-glucan-branching enzyme (EC 2.4.1.18) (Brancher enzyme) (Glycogen-branching enzyme)
GBF1	Q92538	1	1	Golgi-specific brefeldin A-resistance guanine nucleotide exchange factor 1 (BFA-resistant GEF 1)
GCLC	P48506	2	2	Glutamate--cysteine ligase catalytic subunit (EC 6.3.2.2) (GCS heavy chain) (Gamma-ECS) (Gamma-glutamylcysteine synthetase)
GCN1L1	Q92616	10	10	Translational activator GCN1 (HsGCN1) (GCN1-like protein 1)
GDI2	P50395	5	6	Rab GDP dissociation inhibitor beta (Rab GDI beta) (Guanosine diphosphate dissociation inhibitor 2) (GDI-2)
GET4	Q7L5D6	1	1	Golgi to ER traffic protein 4 homolog (Conserved edge-expressed protein) (Transmembrane domain recognition complex 35 kDa subunit) (TRC35)
GFM1	Q96RP9	1	1	Elongation factor G, mitochondrial (EF-Gmt) (Elongation factor G 1, mitochondrial) (mEF-G 1) (Elongation factor G1) (hEFG1)
GFPT1	Q06210	7	9	Glutamine--fructose-6-phosphate aminotransferase [isomerizing] 1 (EC 2.6.1.16) (D-fructose-6-phosphate amidotransferase 1) (Glutamine:fructose-6-phosphate amidotransferase 1) (GFAT 1) (GFAT1) (Hexosephosphate aminotransferase 1)
GGA3	Q9NZ52	1	1	ADP-ribosylation factor-binding protein GGA3 (Golgi-localized, gamma ear-containing, ARF-binding protein 3)
GGH	Q92820	2	2	Gamma-glutamyl hydrolase (EC 3.4.19.9) (Conjugase) (GH) (Gamma-Glu-X carboxypeptidase)
GHITM	Q9H3K2	2	3	Growth hormone-inducible transmembrane protein (Dermal papilla-derived protein 2) (Mitochondrial morphology and cristae structure 1) (MICS1) (Transmembrane BAX inhibitor motif-containing protein 5)
GIGYF2	Q6Y7W6	1	1	PERQ amino acid-rich with GYF domain-containing protein 2 (GRB10-interacting GYF protein 2) (Trinucleotide repeat-containing gene 15 protein)
GLB1	P16278	1	1	Beta-galactosidase (EC 3.2.1.23) (Acid beta-galactosidase) (Lactase) (Elastin receptor 1)
GLDC	P23378	1	1	Glycine dehydrogenase (decarboxylating), mitochondrial (EC 1.4.4.2) (Glycine cleavage system P protein) (Glycine decarboxylase) (Glycine dehydrogenase (aminomethyl-transferring))
GLG1	Q92896	2	2	Golgi apparatus protein 1 (CFR-1) (Cysteine-rich fibroblast growth factor receptor) (E-selectin ligand 1) (ESL-1) (Golgi sialoglycoprotein MG-160)
GLOD4	Q9HC38	1	1	Glyoxalase domain-containing protein 4
GLRX3	O76003	1	1	Glutaredoxin-3 (PKC-interacting cousin of thioredoxin) (PICOT) (PKC-theta-interacting protein) (PKCq-interacting protein) (Thioredoxin-like protein 2)
GLS	O94925	2	2	Glutaminase kidney isoform, mitochondrial (GLS) (EC 3.5.1.2) (K-glutaminase) (L-glutamine amidohydrolase)
GLUD1	P00367	5	8	Glutamate dehydrogenase 1, mitochondrial (GDH 1) (EC 1.4.1.3)
GMPR2	Q9P2T1	1	1	GMP reductase 2 (EC 1.7.1.7) (Guanosine 5'-monophosphate oxidoreductase 2) (Guanosine monophosphate reductase 2)
GMPS	P49915	2	2	GMP synthase [glutamine-hydrolyzing] (EC 6.3.5.2) (GMP synthetase) (Glutamine amidotransferase)
GNB2L1	P63244	5	5	Guanine nucleotide-binding protein subunit beta-2-like 1 (Cell proliferation-inducing gene 21 protein) (Guanine nucleotide-binding protein subunit beta-like protein 12.3) (Human lung cancer oncogene 7 protein) (HLC-7) (Receptor for activated C kinase) (Receptor of activated protein kinase C 1) (RACK1) [Cleaved into: Guanine nucleotide-binding protein subunit beta-2-like 1, N-terminally processed]
GNB3	P16520	1	1	Guanine nucleotide-binding protein G(I)/G(S)/G(T) subunit beta-3 (Transducin beta chain 3)
GNL3	Q9BVP2	1	1	Guanine nucleotide-binding protein-like 3 (E2-induced gene 3 protein) (Novel nucleolar protein 47) (NNP47) (Nucleolar GTP-binding protein 3) (Nucleostemin)
GNL3L	Q9NVN8	1	1	Guanine nucleotide-binding protein-like 3-like protein
GNPDA1	P46926	1	1	Glucosamine-6-phosphate isomerase 1 (EC 3.5.99.6) (Glucosamine-6-phosphate deaminase 1) (GNPDA 1) (GlcN6P deaminase 1) (Oscillin)
GOLGA5	Q8TBA6	2	2	Golgin subfamily A member 5 (Cell proliferation-inducing gene 31 protein) (Golgin-84) (Protein Ret-II) (RET-fused gene 5 protein)
GOT1	P17174	1	2	Aspartate aminotransferase, cytoplasmic (cAspAT) (EC 2.6.1.1) (EC 2.6.1.3) (Cysteine aminotransferase, cytoplasmic) (Cysteine transaminase, cytoplasmic) (cCAT) (Glutamate oxaloacetate transaminase 1) (Transaminase A)
GOT2	P00505	3	4	Aspartate aminotransferase, mitochondrial (mAspAT) (EC 2.6.1.1) (EC 2.6.1.7) (Fatty acid-binding protein) (FABP-1) (Glutamate oxaloacetate transaminase 2) (Kynurenine aminotransferase 4) (Kynurenine aminotransferase IV) (Kynurenine--oxoglutarate transaminase 4) (Kynurenine--oxoglutarate transaminase IV) (Plasma membrane-associated fatty acid-binding protein) (FABPpm) (Transaminase A)
GPC3	P51654	5	7	Glypican-3 (GTR2-2) (Intestinal protein OCI-5) (MXR7) [Cleaved into: Secreted glypican-3]
GPHN	Q9NQX3	1	1	Gephyrin [Includes: Molybdopterin adenylyltransferase (MPT adenylyltransferase) (EC 2.7.7.75) (Domain G); Molybdopterin molybdenumtransferase (MPT Mo-transferase) (EC 2.10.1.1) (Domain E)]
GPT2	Q8TD30	2	2	Alanine aminotransferase 2 (ALT2) (EC 2.6.1.2) (Glutamate pyruvate transaminase 2) (GPT 2) (Glutamic--alanine transaminase 2) (Glutamic--pyruvic transaminase 2)
GPX4	P36969	1	1	Phospholipid hydroperoxide glutathione peroxidase, mitochondrial (PHGPx) (EC 1.11.1.12) (Glutathione peroxidase 4) (GPx-4) (GSHPx-4)
GRB2	P62993	3	3	Growth factor receptor-bound protein 2 (Adapter protein GRB2) (Protein Ash) (SH2/SH3 adapter GRB2)
GREB1	Q4ZG55	1	1	Protein GREB1 (Gene regulated in breast cancer 1 protein)
GSN	P06396	1	1	Gelsolin (AGEL) (Actin-depolymerizing factor) (ADF) (Brevin)
GSR	P00390	2	2	Glutathione reductase, mitochondrial (GR) (GRase) (EC 1.8.1.7)
GSTO1	P78417	2	2	Glutathione S-transferase omega-1 (GSTO-1) (EC 2.5.1.18) (Glutathione S-transferase omega 1-1) (GSTO 1-1) (Glutathione-dependent dehydroascorbate reductase) (EC 1.8.5.1) (Monomethylarsonic acid reductase) (MMA(V) reductase) (EC 1.20.4.2) (S-(Phenacyl)glutathione reductase) (SPG-R)
GSTT1	P30711	1	1	Glutathione S-transferase theta-1 (EC 2.5.1.18) (GST class-theta-1) (Glutathione transferase T1-1)
GTF2F1	P35269	1	1	General transcription factor IIF subunit 1 (General transcription factor IIF 74 kDa subunit) (Transcription initiation factor IIF subunit alpha) (TFIIF-alpha) (Transcription initiation factor RAP74)
GTF2I	P78347	1	1	General transcription factor II-I (GTFII-I) (TFII-I) (Bruton tyrosine kinase-associated protein 135) (BAP-135) (BTK-associated protein 135) (SRF-Phox1-interacting protein) (SPIN) (Williams-Beuren syndrome chromosomal region 6 protein)
GTF3C1	Q12789	1	1	General transcription factor 3C polypeptide 1 (TF3C-alpha) (TFIIIC box B-binding subunit) (Transcription factor IIIC 220 kDa subunit) (TFIIIC 220 kDa subunit) (TFIIIC220) (Transcription factor IIIC subunit alpha)
GTF3C2	Q8WUA4	1	1	General transcription factor 3C polypeptide 2 (TF3C-beta) (Transcription factor IIIC 110 kDa subunit) (TFIIIC 110 kDa subunit) (TFIIIC110) (Transcription factor IIIC subunit beta)
GTPBP1	O00178	1	1	GTP-binding protein 1 (G-protein 1) (GP-1) (GP1)
GTPBP10	A4D1E9	1	1	GTP-binding protein 10 (Protein obg homolog 2) (ObgH2)
GTPBP4	Q9BZE4	1	2	Nucleolar GTP-binding protein 1 (Chronic renal failure gene protein) (GTP-binding protein NGB)
GYG1	P46976	1	1	Glycogenin-1 (GN-1) (GN1) (EC 2.4.1.186)
H1F0	P07305	3	10	Histone H1.0 (Histone H1') (Histone H1(0)) [Cleaved into: Histone H1.0, N-terminally processed]
H1FX	Q92522	2	2	Histone H1x
H2AFY	O75367	7	8	Core histone macro-H2A.1 (Histone macroH2A1) (mH2A1) (Histone H2A.y) (H2A/y) (Medulloblastoma antigen MU-MB-50.205)
H3F3A	P84243	1	1	Histone H3.3
H6PD	O95479	1	1	GDH/6PGL endoplasmic bifunctional protein [Includes: Glucose 1-dehydrogenase (EC 1.1.1.47) (Hexose-6-phosphate dehydrogenase); 6-phosphogluconolactonase (6PGL) (EC 3.1.1.31)]
HADH	Q16836	2	3	Hydroxyacyl-coenzyme A dehydrogenase, mitochondrial (HCDH) (EC 1.1.1.35) (Medium and short-chain L-3-hydroxyacyl-coenzyme A dehydrogenase) (Short-chain 3-hydroxyacyl-CoA dehydrogenase)
HADHA	P40939	8	11	Trifunctional enzyme subunit alpha, mitochondrial (78 kDa gastrin-binding protein) (TP-alpha) [Includes: Long-chain enoyl-CoA hydratase (EC 4.2.1.17); Long chain 3-hydroxyacyl-CoA dehydrogenase (EC 1.1.1.211)]
HADHB	P55084	3	3	Trifunctional enzyme subunit beta, mitochondrial (TP-beta) [Includes: 3-ketoacyl-CoA thiolase (EC 2.3.1.16) (Acetyl-CoA acyltransferase) (Beta-ketothiolase)]
HAT1	O14929	1	1	Histone acetyltransferase type B catalytic subunit (EC 2.3.1.48) (Histone acetyltransferase 1)
HCFC1	P51610	2	3	Host cell factor 1 (HCF) (HCF-1) (C1 factor) (CFF) (VCAF) (VP16 accessory protein) [Cleaved into: HCF N-terminal chain 1; HCF N-terminal chain 2; HCF N-terminal chain 3; HCF N-terminal chain 4; HCF N-terminal chain 5; HCF N-terminal chain 6; HCF C-terminal chain 1; HCF C-terminal chain 2; HCF C-terminal chain 3; HCF C-terminal chain 4; HCF C-terminal chain 5; HCF C-terminal chain 6]
HDGF	P51858	4	4	Hepatoma-derived growth factor (HDGF) (High mobility group protein 1-like 2) (HMG-1L2)
HDLBP	Q00341	1	1	Vigilin (High density lipoprotein-binding protein) (HDL-binding protein)
HECTD1	Q9ULT8	1	1	E3 ubiquitin-protein ligase HECTD1 (EC 6.3.2.-) (E3 ligase for inhibin receptor) (EULIR) (HECT domain-containing protein 1)
HERC2	O95714	1	1	E3 ubiquitin-protein ligase HERC2 (EC 6.3.2.-) (HECT domain and RCC1-like domain-containing protein 2)
HGS	O14964	1	1	Hepatocyte growth factor-regulated tyrosine kinase substrate (Hrs) (Protein pp110)
HIBADH	P31937	1	1	3-hydroxyisobutyrate dehydrogenase, mitochondrial (HIBADH) (EC 1.1.1.31)
HIBCH	Q6NVY1	1	1	3-hydroxyisobutyryl-CoA hydrolase, mitochondrial (EC 3.1.2.4) (3-hydroxyisobutyryl-coenzyme A hydrolase) (HIB-CoA hydrolase) (HIBYL-CoA-H)
HID1	Q8IV36	1	1	Protein HID1 (Down-regulated in multiple cancers 1) (HID1 domain-containing protein) (Protein hid-1 homolog)
HIST1H1B	P16401	7	17	Histone H1.5 (Histone H1a) (Histone H1b) (Histone H1s-3)
HIST1H1C	P16403	2	9	Histone H1.2 (Histone H1c) (Histone H1d) (Histone H1s-1)
HIST1H1D	P16402	4	16	Histone H1.3 (Histone H1c) (Histone H1s-2)
HIST1H1E	P10412	3	10	Histone H1.4 (Histone H1b) (Histone H1s-4)
HIST1H3A	P68431	3	8	Histone H3.1 (Histone H3/a) (Histone H3/b) (Histone H3/c) (Histone H3/d) (Histone H3/f) (Histone H3/h) (Histone H3/i) (Histone H3/j) (Histone H3/k) (Histone H3/l)
HIST2H2BC	Q6DN03	1	4	Putative histone H2B type 2-C (Histone H2B.t) (H2B/t)
HIST2H2BF	Q5QNW6	4	24	Histone H2B type 2-F
HK2	P52789	1	1	Hexokinase-2 (EC 2.7.1.1) (Hexokinase type II) (HK II) (Muscle form hexokinase)
HKDC1	Q2TB90	2	5	Putative hexokinase HKDC1 (EC 2.7.1.1) (Hexokinase domain-containing protein 1)
HM13	Q8TCT9	3	4	Minor histocompatibility antigen H13 (EC 3.4.23.-) (Intramembrane protease 1) (IMP-1) (IMPAS-1) (hIMP1) (Presenilin-like protein 3) (Signal peptide peptidase)
HMGA1	P17096	1	1	High mobility group protein HMG-I/HMG-Y (HMG-I(Y)) (High mobility group AT-hook protein 1) (High mobility group protein A1) (High mobility group protein R)
HMGA2	P52926	1	1	High mobility group protein HMGI-C (High mobility group AT-hook protein 2)
HMGB1	P09429	2	4	High mobility group protein B1 (High mobility group protein 1) (HMG-1)
HMGB2	P26583	2	3	High mobility group protein B2 (High mobility group protein 2) (HMG-2)
HMGCL	P35914	2	2	Hydroxymethylglutaryl-CoA lyase, mitochondrial (HL) (HMG-CoA lyase) (EC 4.1.3.4) (3-hydroxy-3-methylglutarate-CoA lyase)
HMGCLL1	Q8TB92	1	2	3-hydroxymethyl-3-methylglutaryl-CoA lyase, cytoplasmic (EC 4.1.3.4) (3-hydroxymethyl-3-methylglutaryl-CoA lyase-like protein 1) (Endoplasmic reticulum 3-hydroxymethyl-3-methylglutaryl-CoA lyase) (er-cHL)
HMGCS1	Q01581	2	2	Hydroxymethylglutaryl-CoA synthase, cytoplasmic (HMG-CoA synthase) (EC 2.3.3.10) (3-hydroxy-3-methylglutaryl coenzyme A synthase)
HMGN1	P05114	1	1	Non-histone chromosomal protein HMG-14 (High mobility group nucleosome-binding domain-containing protein 1)
HMGN2	P05204	2	2	Non-histone chromosomal protein HMG-17 (High mobility group nucleosome-binding domain-containing protein 2)
HMOX2	P30519	2	3	Heme oxygenase 2 (HO-2) (EC 1.14.99.3)
HNMT	P50135	2	2	Histamine N-methyltransferase (HMT) (EC 2.1.1.8)
HNRNPA2B1	P22626	2	2	Heterogeneous nuclear ribonucleoproteins A2/B1 (hnRNP A2/B1)
HNRNPA3	P51991	4	7	Heterogeneous nuclear ribonucleoprotein A3 (hnRNP A3)
HNRNPAB	Q99729	2	2	Heterogeneous nuclear ribonucleoprotein A/B (hnRNP A/B) (APOBEC1-binding protein 1) (ABBP-1)
HNRNPC	P07910	3	4	Heterogeneous nuclear ribonucleoproteins C1/C2 (hnRNP C1/C2)
HNRNPD	Q14103	4	6	Heterogeneous nuclear ribonucleoprotein D0 (hnRNP D0) (AU-rich element RNA-binding protein 1)
HNRNPDL	O14979	2	2	Heterogeneous nuclear ribonucleoprotein D-like (hnRNP D-like) (hnRNP DL) (AU-rich element RNA-binding factor) (JKT41-binding protein) (Protein laAUF1)
HNRNPF	P52597	1	1	Heterogeneous nuclear ribonucleoprotein F (hnRNP F) (Nucleolin-like protein mcs94-1) [Cleaved into: Heterogeneous nuclear ribonucleoprotein F, N-terminally processed]
HNRNPH3	P31942	1	1	Heterogeneous nuclear ribonucleoprotein H3 (hnRNP H3) (Heterogeneous nuclear ribonucleoprotein 2H9) (hnRNP 2H9)
HNRNPK	P61978	3	3	Heterogeneous nuclear ribonucleoprotein K (hnRNP K) (Transformation up-regulated nuclear protein) (TUNP)
HNRNPL	P14866	2	2	Heterogeneous nuclear ribonucleoprotein L (hnRNP L)
HNRNPM	P52272	2	4	Heterogeneous nuclear ribonucleoprotein M (hnRNP M)
HNRNPR	O43390	3	3	Heterogeneous nuclear ribonucleoprotein R (hnRNP R)
HNRNPU	Q00839	10	16	Heterogeneous nuclear ribonucleoprotein U (hnRNP U) (Scaffold attachment factor A) (SAF-A) (p120) (pp120)
HNRNPUL2	Q1KMD3	4	7	Heterogeneous nuclear ribonucleoprotein U-like protein 2 (Scaffold-attachment factor A2) (SAF-A2)
HP1BP3	Q5SSJ5	6	13	Heterochromatin protein 1-binding protein 3 (Protein HP1-BP74)
HPD	P32754	2	2	4-hydroxyphenylpyruvate dioxygenase (EC 1.13.11.27) (4-hydroxyphenylpyruvic acid oxidase) (4HPPD) (HPD) (HPPDase)
HSD17B11	Q8NBQ5	1	1	Estradiol 17-beta-dehydrogenase 11 (EC 1.1.1.62) (17-beta-hydroxysteroid dehydrogenase 11) (17-beta-HSD 11) (17bHSD11) (17betaHSD11) (17-beta-hydroxysteroid dehydrogenase XI) (17-beta-HSD XI) (17betaHSDXI) (Cutaneous T-cell lymphoma-associated antigen HD-CL-03) (CTCL-associated antigen HD-CL-03) (Dehydrogenase/reductase SDR family member 8) (Retinal short-chain dehydrogenase/reductase 2) (retSDR2)
HSD17B12	Q53GQ0	1	1	Estradiol 17-beta-dehydrogenase 12 (EC 1.1.1.62) (17-beta-hydroxysteroid dehydrogenase 12) (17-beta-HSD 12) (3-ketoacyl-CoA reductase) (KAR) (EC 1.3.1.-)
HSD17B4	P51659	4	4	Peroxisomal multifunctional enzyme type 2 (MFE-2) (17-beta-hydroxysteroid dehydrogenase 4) (17-beta-HSD 4) (D-bifunctional protein) (DBP) (Multifunctional protein 2) (MPF-2) [Cleaved into: (3R)-hydroxyacyl-CoA dehydrogenase (EC 1.1.1.n12); Enoyl-CoA hydratase 2 (EC 4.2.1.107) (EC 4.2.1.119) (3-alpha,7-alpha,12-alpha-trihydroxy-5-beta-cholest-24-enoyl-CoA hydratase)]
HSD17B7	P56937	1	1	3-keto-steroid reductase (EC 1.1.1.270) (17-beta-hydroxysteroid dehydrogenase 7) (17-beta-HSD 7) (Estradiol 17-beta-dehydrogenase 7) (EC 1.1.1.62)
HSDL2	Q6YN16	3	3	Hydroxysteroid dehydrogenase-like protein 2 (EC 1.-.-.-)
HSP90AA1	P07900	6	11	Heat shock protein HSP 90-alpha (Heat shock 86 kDa) (HSP 86) (HSP86) (Renal carcinoma antigen NY-REN-38)
HSP90AB1	P08238	5	7	Heat shock protein HSP 90-beta (HSP 90) (Heat shock 84 kDa) (HSP 84) (HSP84)
HSP90B1	P14625	12	18	Endoplasmin (94 kDa glucose-regulated protein) (GRP-94) (Heat shock protein 90 kDa beta member 1) (Tumor rejection antigen 1) (gp96 homolog)
HSPA1A	P08107	1	1	Heat shock 70 kDa protein 1A/1B (Heat shock 70 kDa protein 1/2) (HSP70-1/HSP70-2) (HSP70.1/HSP70.2)
HSPA4	P34932	3	3	Heat shock 70 kDa protein 4 (HSP70RY) (Heat shock 70-related protein APG-2)
HSPA5	P11021	1	1	78 kDa glucose-regulated protein (GRP-78) (Endoplasmic reticulum lumenal Ca(2+)-binding protein grp78) (Heat shock 70 kDa protein 5) (Immunoglobulin heavy chain-binding protein) (BiP)
HSPA8	P11142	5	7	Heat shock cognate 71 kDa protein (Heat shock 70 kDa protein 8)
HSPA9	P38646	3	3	Stress-70 protein, mitochondrial (75 kDa glucose-regulated protein) (GRP-75) (Heat shock 70 kDa protein 9) (Mortalin) (MOT) (Peptide-binding protein 74) (PBP74)
HSPD1	P10809	8	11	60 kDa heat shock protein, mitochondrial (60 kDa chaperonin) (Chaperonin 60) (CPN60) (Heat shock protein 60) (HSP-60) (Hsp60) (HuCHA60) (Mitochondrial matrix protein P1) (P60 lymphocyte protein)
HSPE1	P61604	3	7	10 kDa heat shock protein, mitochondrial (Hsp10) (10 kDa chaperonin) (Chaperonin 10) (CPN10) (Early-pregnancy factor) (EPF)
HUWE1	Q7Z6Z7	2	2	E3 ubiquitin-protein ligase HUWE1 (EC 6.3.2.-) (ARF-binding protein 1) (ARF-BP1) (HECT, UBA and WWE domain-containing protein 1) (Homologous to E6AP carboxyl terminus homologous protein 9) (HectH9) (Large structure of UREB1) (LASU1) (Mcl-1 ubiquitin ligase E3) (Mule) (Upstream regulatory element-binding protein 1) (URE-B1) (URE-binding protein 1)
HYOU1	Q9Y4L1	4	5	Hypoxia up-regulated protein 1 (150 kDa oxygen-regulated protein) (ORP-150) (170 kDa glucose-regulated protein) (GRP-170)
IARS	P41252	3	5	Isoleucine--tRNA ligase, cytoplasmic (EC 6.1.1.5) (Isoleucyl-tRNA synthetase) (IRS) (IleRS)
IARS2	Q9NSE4	2	2	Isoleucine--tRNA ligase, mitochondrial (EC 6.1.1.5) (Isoleucyl-tRNA synthetase) (IleRS)
ICMT	O60725	1	1	Protein-S-isoprenylcysteine O-methyltransferase (EC 2.1.1.100) (Isoprenylcysteine carboxylmethyltransferase) (Prenylated protein carboxyl methyltransferase) (PPMT) (Prenylcysteine carboxyl methyltransferase) (pcCMT)
IDH1	O75874	5	6	Isocitrate dehydrogenase [NADP] cytoplasmic (IDH) (EC 1.1.1.42) (Cytosolic NADP-isocitrate dehydrogenase) (IDP) (NADP(+)-specific ICDH) (Oxalosuccinate decarboxylase)
IDH2	P48735	6	6	Isocitrate dehydrogenase [NADP], mitochondrial (IDH) (EC 1.1.1.42) (ICD-M) (IDP) (NADP(+)-specific ICDH) (Oxalosuccinate decarboxylase)
IDH3B	O43837	1	2	Isocitrate dehydrogenase [NAD] subunit beta, mitochondrial (EC 1.1.1.41) (Isocitric dehydrogenase subunit beta) (NAD(+)-specific ICDH subunit beta)
IDI1	Q13907	2	2	Isopentenyl-diphosphate Delta-isomerase 1 (EC 5.3.3.2) (Isopentenyl pyrophosphate isomerase 1) (IPP isomerase 1) (IPPI1)
IFITM3	Q01628	1	1	Interferon-induced transmembrane protein 3 (Dispanin subfamily A member 2b) (DSPA2b) (Interferon-inducible protein 1-8U)
IFT81	Q8WYA0	1	1	Intraflagellar transport protein 81 homolog (Carnitine deficiency-associated protein expressed in ventricle 1) (CDV-1)
IGF1R	P08069	1	1	Insulin-like growth factor 1 receptor (EC 2.7.10.1) (Insulin-like growth factor I receptor) (IGF-I receptor) (CD antigen CD221) [Cleaved into: Insulin-like growth factor 1 receptor alpha chain; Insulin-like growth factor 1 receptor beta chain]
IGF2BP1	Q9NZI8	5	6	Insulin-like growth factor 2 mRNA-binding protein 1 (IGF2 mRNA-binding protein 1) (IMP-1) (IMP1) (Coding region determinant-binding protein) (CRD-BP) (IGF-II mRNA-binding protein 1) (VICKZ family member 1) (Zipcode-binding protein 1) (ZBP-1)
IGFBP1	P08833	1	1	Insulin-like growth factor-binding protein 1 (IBP-1) (IGF-binding protein 1) (IGFBP-1) (Placental protein 12) (PP12)
IK	Q13123	1	1	Protein Red (Cytokine IK) (IK factor) (Protein RER)
ILF2	Q12905	2	3	Interleukin enhancer-binding factor 2 (Nuclear factor of activated T-cells 45 kDa)
ILF3	Q12906	2	3	Interleukin enhancer-binding factor 3 (Double-stranded RNA-binding protein 76) (DRBP76) (M-phase phosphoprotein 4) (MPP4) (Nuclear factor associated with dsRNA) (NFAR) (Nuclear factor of activated T-cells 90 kDa) (NF-AT-90) (Translational control protein 80) (TCP80)
IMMT	Q16891	1	2	Mitochondrial inner membrane protein (Cell proliferation-inducing gene 4/52 protein) (Mitofilin) (p87/89)
IMPA2	O14732	1	1	Inositol monophosphatase 2 (IMP 2) (IMPase 2) (EC 3.1.3.25) (Inositol-1(or 4)-monophosphatase 2) (Myo-inositol monophosphatase A2)
IMPDH2	P12268	1	1	Inosine-5'-monophosphate dehydrogenase 2 (IMP dehydrogenase 2) (IMPD 2) (IMPDH 2) (EC 1.1.1.205) (IMPDH-II)
INA	Q16352	1	1	Alpha-internexin (Alpha-Inx) (66 kDa neurofilament protein) (NF-66) (Neurofilament-66) (Neurofilament 5)
IPO8	O15397	1	1	Importin-8 (Imp8) (Ran-binding protein 8) (RanBP8)
IQCB1	Q15051	1	1	IQ calmodulin-binding motif-containing protein 1 (Nephrocystin-5) (p53 and DNA damage-regulated IQ motif protein) (PIQ)
IQGAP1	P46940	4	4	Ras GTPase-activating-like protein IQGAP1 (p195)
IQGAP2	Q13576	2	3	Ras GTPase-activating-like protein IQGAP2
IST1	P53990	2	2	IST1 homolog (hIST1) (Putative MAPK-activating protein PM28)
ITCH	Q96J02	1	1	E3 ubiquitin-protein ligase Itchy homolog (Itch) (EC 6.3.2.-) (Atrophin-1-interacting protein 4) (AIP4) (NFE2-associated polypeptide 1) (NAPP1)
ITIH2	P19823	1	1	Inter-alpha-trypsin inhibitor heavy chain H2 (ITI heavy chain H2) (ITI-HC2) (Inter-alpha-inhibitor heavy chain 2) (Inter-alpha-trypsin inhibitor complex component II) (Serum-derived hyaluronan-associated protein) (SHAP)
ITM2B	Q9Y287	1	1	Integral membrane protein 2B (Immature BRI2) (imBRI2) (Protein E25B) (Transmembrane protein BRI) (Bri) [Cleaved into: BRI2, membrane form (Mature BRI2) (mBRI2); BRI2 intracellular domain (BRI2 ICD); BRI2C, soluble form; Bri23 peptide (Bri2-23) (ABri23) (C-terminal peptide) (P23 peptide)]
ITPA	Q9BY32	1	1	Inosine triphosphate pyrophosphatase (ITPase) (Inosine triphosphatase) (EC 3.6.1.19) (Non-canonical purine NTP pyrophosphatase) (Non-standard purine NTP pyrophosphatase) (Nucleoside-triphosphate diphosphatase) (Nucleoside-triphosphate pyrophosphatase) (NTPase) (Putative oncogene protein hlc14-06-p)
ITPR1	Q14643	1	1	Inositol 1,4,5-trisphosphate receptor type 1 (IP3 receptor isoform 1) (IP3R 1) (InsP3R1) (Type 1 inositol 1,4,5-trisphosphate receptor) (Type 1 InsP3 receptor)
ITPR2	Q14571	2	3	Inositol 1,4,5-trisphosphate receptor type 2 (IP3 receptor isoform 2) (IP3R 2) (InsP3R2) (Type 2 inositol 1,4,5-trisphosphate receptor) (Type 2 InsP3 receptor)
ITSN1	Q15811	1	1	Intersectin-1 (SH3 domain-containing protein 1A) (SH3P17)
IVD	P26440	1	3	Isovaleryl-CoA dehydrogenase, mitochondrial (IVD) (EC 1.3.8.4)
IWS1	Q96ST2	1	1	Protein IWS1 homolog (IWS1-like protein)
JARID2	Q92833	1	1	Protein Jumonji (Jumonji/ARID domain-containing protein 2)
JUP	P14923	3	3	Junction plakoglobin (Catenin gamma) (Desmoplakin III) (Desmoplakin-3)
KAL1	P23352	1	1	Anosmin-1 (Adhesion molecule-like X-linked) (Kallmann syndrome protein)
KALRN	O60229	1	1	Kalirin (EC 2.7.11.1) (Huntingtin-associated protein-interacting protein) (Protein Duo) (Serine/threonine-protein kinase with Dbl- and pleckstrin homology domain)
KANK1	Q14678	1	1	KN motif and ankyrin repeat domain-containing protein 1 (Ankyrin repeat domain-containing protein 15) (Kidney ankyrin repeat-containing protein)
KANSL1	Q7Z3B3	1	1	KAT8 regulatory NSL complex subunit 1 (MLL1/MLL complex subunit KANSL1) (MSL1 homolog 1) (hMSL1v1) (NSL complex protein NSL1) (Non-specific lethal 1 homolog)
KATNA1	O75449	1	1	Katanin p60 ATPase-containing subunit A1 (Katanin p60 subunit A1) (EC 3.6.4.3) (p60 katanin)
KDM1A	O60341	1	1	Lysine-specific histone demethylase 1A (EC 1.-.-.-) (BRAF35-HDAC complex protein BHC110) (Flavin-containing amine oxidase domain-containing protein 2)
KDM2A	Q9Y2K7	1	1	Lysine-specific demethylase 2A (EC 1.14.11.27) (CXXC-type zinc finger protein 8) (F-box and leucine-rich repeat protein 11) (F-box protein FBL7) (F-box protein Lilina) (F-box/LRR-repeat protein 11) (JmjC domain-containing histone demethylation protein 1A) ([Histone-H3]-lysine-36 demethylase 1A)
KDM3A	Q9Y4C1	2	2	Lysine-specific demethylase 3A (EC 1.14.11.-) (JmjC domain-containing histone demethylation protein 2A) (Jumonji domain-containing protein 1A)
KDM4C	Q9H3R0	1	1	Lysine-specific demethylase 4C (EC 1.14.11.-) (Gene amplified in squamous cell carcinoma 1 protein) (GASC-1 protein) (JmjC domain-containing histone demethylation protein 3C) (Jumonji domain-containing protein 2C)
KEAP1	Q14145	1	1	Kelch-like ECH-associated protein 1 (Cytosolic inhibitor of Nrf2) (INrf2) (Kelch-like protein 19)
KHDRBS1	Q07666	2	2	KH domain-containing, RNA-binding, signal transduction-associated protein 1 (GAP-associated tyrosine phosphoprotein p62) (Src-associated in mitosis 68 kDa protein) (Sam68) (p21 Ras GTPase-activating protein-associated p62) (p68)
KHSRP	Q92945	1	2	Far upstream element-binding protein 2 (FUSE-binding protein 2) (KH type-splicing regulatory protein) (KSRP) (p75)
KIAA0391	O15091	1	1	Mitochondrial ribonuclease P protein 3 (Mitochondrial RNase P protein 3)
KIAA1217	Q5T5P2	1	2	Sickle tail protein homolog
KIF20A	O95235	1	1	Kinesin-like protein KIF20A (GG10_2) (Mitotic kinesin-like protein 2) (MKlp2) (Rab6-interacting kinesin-like protein) (Rabkinesin-6)
KIF20B	Q96Q89	2	2	Kinesin-like protein KIF20B (Cancer/testis antigen 90) (CT90) (Kinesin-related motor interacting with PIN1) (M-phase phosphoprotein 1) (MPP1)
KIF21A	Q7Z4S6	1	1	Kinesin-like protein KIF21A (Kinesin-like protein KIF2) (Renal carcinoma antigen NY-REN-62)
KIF23	Q02241	1	1	Kinesin-like protein KIF23 (Kinesin-like protein 5) (Mitotic kinesin-like protein 1)
KIF2A	O00139	1	1	Kinesin-like protein KIF2A (Kinesin-2) (hK2)
KIF2C	Q99661	4	4	Kinesin-like protein KIF2C (Kinesin-like protein 6) (Mitotic centromere-associated kinesin) (MCAK)
KIF4A	O95239	1	1	Chromosome-associated kinesin KIF4A (Chromokinesin-A)
KIF5B	P33176	1	1	Kinesin-1 heavy chain (Conventional kinesin heavy chain) (Ubiquitous kinesin heavy chain) (UKHC)
KIF7	Q2M1P5	1	1	Kinesin-like protein KIF7
KIFC1	Q9BW19	1	1	Kinesin-like protein KIFC1 (Kinesin-like protein 2) (Kinesin-related protein HSET)
KIN	O60870	1	1	DNA/RNA-binding protein KIN17 (Binding to curved DNA) (KIN, antigenic determinant of recA protein homolog)
KNOP1	Q1ED39	1	1	Lysine-rich nucleolar protein 1 (Protein FAM191A) (Testis-specific gene 118 protein)
KPNA2	P52292	1	1	Importin subunit alpha-1 (Karyopherin subunit alpha-2) (RAG cohort protein 1) (SRP1-alpha)
KPNB1	Q14974	3	4	Importin subunit beta-1 (Importin-90) (Karyopherin subunit beta-1) (Nuclear factor p97) (Pore targeting complex 97 kDa subunit) (PTAC97)
KRIT1	O00522	1	1	Krev interaction trapped protein 1 (Krev interaction trapped 1) (Cerebral cavernous malformations 1 protein)
KRT1	P04264	1	1	Keratin, type II cytoskeletal 1 (67 kDa cytokeratin) (Cytokeratin-1) (CK-1) (Hair alpha protein) (Keratin-1) (K1) (Type-II keratin Kb1)
KRT18	P05783	3	4	Keratin, type I cytoskeletal 18 (Cell proliferation-inducing gene 46 protein) (Cytokeratin-18) (CK-18) (Keratin-18) (K18)
KRT6C	P48668	1	1	Keratin, type II cytoskeletal 6C (Cytokeratin-6C) (CK-6C) (Cytokeratin-6E) (CK-6E) (Keratin K6h) (Keratin-6C) (K6C) (Type-II keratin Kb12)
KRT8	P05787	7	10	Keratin, type II cytoskeletal 8 (Cytokeratin-8) (CK-8) (Keratin-8) (K8) (Type-II keratin Kb8)
KTN1	Q86UP2	2	2	Kinectin (CG-1 antigen) (Kinesin receptor)
LAP3	P28838	2	2	Cytosol aminopeptidase (EC 3.4.11.1) (Leucine aminopeptidase 3) (LAP-3) (Leucyl aminopeptidase) (Peptidase S) (Proline aminopeptidase) (EC 3.4.11.5) (Prolyl aminopeptidase)
LARP1	Q6PKG0	3	3	La-related protein 1 (La ribonucleoprotein domain family member 1)
LARP4	Q71RC2	3	3	La-related protein 4 (La ribonucleoprotein domain family member 4)
LASP1	Q14847	5	6	LIM and SH3 domain protein 1 (LASP-1) (Metastatic lymph node gene 50 protein) (MLN 50)
LDHA	P00338	9	20	L-lactate dehydrogenase A chain (LDH-A) (EC 1.1.1.27) (Cell proliferation-inducing gene 19 protein) (LDH muscle subunit) (LDH-M) (Renal carcinoma antigen NY-REN-59)
LDHAL6B	Q9BYZ2	1	1	L-lactate dehydrogenase A-like 6B (EC 1.1.1.27)
LEMD2	Q8NC56	1	1	LEM domain-containing protein 2 (hLEM2)
LENG8	Q96PV6	1	5	Leukocyte receptor cluster member 8
LETM1	O95202	3	4	LETM1 and EF-hand domain-containing protein 1, mitochondrial (Leucine zipper-EF-hand-containing transmembrane protein 1)
LIG1	P18858	3	3	DNA ligase 1 (EC 6.5.1.1) (DNA ligase I) (Polydeoxyribonucleotide synthase [ATP] 1)
LIMA1	Q9UHB6	1	1	LIM domain and actin-binding protein 1 (Epithelial protein lost in neoplasm)
LIN54	Q6MZP7	1	1	Protein lin-54 homolog (CXC domain-containing protein 1)
LMNB1	P20700	2	2	Lamin-B1
LMO7	Q8WWI1	1	1	LIM domain only protein 7 (LMO-7) (F-box only protein 20) (LOMP)
LRCH3	Q96II8	1	1	Leucine-rich repeat and calponin homology domain-containing protein 3
LRP1	Q07954	1	1	Prolow-density lipoprotein receptor-related protein 1 (LRP-1) (Alpha-2-macroglobulin receptor) (A2MR) (Apolipoprotein E receptor) (APOER) (CD antigen CD91) [Cleaved into: Low-density lipoprotein receptor-related protein 1 85 kDa subunit (LRP-85); Low-density lipoprotein receptor-related protein 1 515 kDa subunit (LRP-515); Low-density lipoprotein receptor-related protein 1 intracellular domain (L…
LRPPRC	P42704	8	10	Leucine-rich PPR motif-containing protein, mitochondrial (130 kDa leucine-rich protein) (LRP 130) (GP130)
LSS	P48449	2	2	Lanosterol synthase (EC 5.4.99.7) (2,3-epoxysqualene--lanosterol cyclase) (Oxidosqualene--lanosterol cyclase) (OSC) (hOSC)
LTN1	O94822	1	1	E3 ubiquitin-protein ligase listerin (EC 6.3.2.-) (RING finger protein 160) (Zinc finger protein 294)
LUC7L3	O95232	1	1	Luc7-like protein 3 (Cisplatin resistance-associated-overexpressed protein) (Luc7A) (Okadaic acid-inducible phosphoprotein OA48-18) (cAMP regulatory element-associated protein 1) (CRE-associated protein 1) (CREAP-1)
LUZP1	Q86V48	1	1	Leucine zipper protein 1
LYPLA1	O75608	1	2	Acyl-protein thioesterase 1 (APT-1) (hAPT1) (EC 3.1.2.-) (Lysophospholipase 1) (Lysophospholipase I) (LPL-I) (LysoPLA I)
LYPLAL1	Q5VWZ2	1	1	Lysophospholipase-like protein 1 (EC 3.1.2.-)
LZIC	Q8WZA0	1	1	Protein LZIC (Leucine zipper and CTNNBIP1 domain-containing protein) (Leucine zipper and ICAT homologous domain-containing protein)
MAGED1	Q9Y5V3	1	3	Melanoma-associated antigen D1 (MAGE tumor antigen CCF) (MAGE-D1 antigen) (Neurotrophin receptor-interacting MAGE homolog)
MAGED2	Q9UNF1	3	3	Melanoma-associated antigen D2 (11B6) (Breast cancer-associated gene 1 protein) (BCG-1) (Hepatocellular carcinoma-associated protein JCL-1) (MAGE-D2 antigen)
MALT1	Q9UDY8	1	2	Mucosa-associated lymphoid tissue lymphoma translocation protein 1 (EC 3.4.22.-) (MALT lymphoma-associated translocation) (Paracaspase)
MAN1A1	P33908	2	2	Mannosyl-oligosaccharide 1,2-alpha-mannosidase IA (EC 3.2.1.113) (Man(9)-alpha-mannosidase) (Man9-mannosidase) (Mannosidase alpha class 1A member 1) (Processing alpha-1,2-mannosidase IA) (Alpha-1,2-mannosidase IA)
MAN2C1	Q9NTJ4	1	1	Alpha-mannosidase 2C1 (EC 3.2.1.24) (Alpha mannosidase 6A8B) (Alpha-D-mannoside mannohydrolase) (Mannosidase alpha class 2C member 1)
MAOA	P21397	1	1	Amine oxidase [flavin-containing] A (EC 1.4.3.4) (Monoamine oxidase type A) (MAO-A)
MAP2K1	Q02750	1	1	Dual specificity mitogen-activated protein kinase kinase 1 (MAP kinase kinase 1) (MAPKK 1) (MKK1) (EC 2.7.12.2) (ERK activator kinase 1) (MAPK/ERK kinase 1) (MEK 1)
MAP2K7	O14733	1	1	Dual specificity mitogen-activated protein kinase kinase 7 (MAP kinase kinase 7) (MAPKK 7) (EC 2.7.12.2) (JNK-activating kinase 2) (MAPK/ERK kinase 7) (MEK 7) (Stress-activated protein kinase kinase 4) (SAPK kinase 4) (SAPKK-4) (SAPKK4) (c-Jun N-terminal kinase kinase 2) (JNK kinase 2) (JNKK 2)
MAP4	P27816	6	6	Microtubule-associated protein 4 (MAP-4)
MAPKAPK2	P49137	1	1	MAP kinase-activated protein kinase 2 (MAPK-activated protein kinase 2) (MAPKAP kinase 2) (MAPKAP-K2) (MAPKAPK-2) (MK-2) (MK2) (EC 2.7.11.1)
MARK2	Q7KZI7	1	1	Serine/threonine-protein kinase MARK2 (EC 2.7.11.1) (EC 2.7.11.26) (ELKL motif kinase 1) (EMK-1) (MAP/microtubule affinity-regulating kinase 2) (PAR1 homolog) (PAR1 homolog b) (Par-1b) (Par1b)
MARK3	P27448	1	1	MAP/microtubule affinity-regulating kinase 3 (EC 2.7.11.1) (C-TAK1) (cTAK1) (Cdc25C-associated protein kinase 1) (ELKL motif kinase 2) (EMK-2) (Protein kinase STK10) (Ser/Thr protein kinase PAR-1) (Par-1a) (Serine/threonine-protein kinase p78)
MARS	P56192	1	1	Methionine--tRNA ligase, cytoplasmic (EC 6.1.1.10) (Methionyl-tRNA synthetase) (MetRS)
MAST4	O15021	1	1	Microtubule-associated serine/threonine-protein kinase 4 (EC 2.7.11.1)
MAT1A	Q00266	2	3	S-adenosylmethionine synthase isoform type-1 (AdoMet synthase 1) (EC 2.5.1.6) (Methionine adenosyltransferase 1) (MAT 1) (Methionine adenosyltransferase I/III) (MAT-I/III)
MAT2A	P31153	1	1	S-adenosylmethionine synthase isoform type-2 (AdoMet synthase 2) (EC 2.5.1.6) (Methionine adenosyltransferase 2) (MAT 2) (Methionine adenosyltransferase II) (MAT-II)
MATR3	P43243	4	4	Matrin-3
MCCC2	Q9HCC0	1	1	Methylcrotonoyl-CoA carboxylase beta chain, mitochondrial (MCCase subunit beta) (EC 6.4.1.4) (3-methylcrotonyl-CoA carboxylase 2) (3-methylcrotonyl-CoA carboxylase non-biotin-containing subunit) (3-methylcrotonyl-CoA:carbon dioxide ligase subunit beta)
MCM10	Q7L590	1	1	Protein MCM10 homolog (HsMCM10)
MCM3	P25205	3	5	DNA replication licensing factor MCM3 (EC 3.6.4.12) (DNA polymerase alpha holoenzyme-associated protein P1) (P1-MCM3) (RLF subunit beta) (p102)
MCM5	P33992	1	1	DNA replication licensing factor MCM5 (EC 3.6.4.12) (CDC46 homolog) (P1-CDC46)
MCTS1	Q9ULC4	1	2	Malignant T-cell-amplified sequence 1 (MCT-1) (Multiple copies T-cell malignancies)
MDH1	P40925	2	2	Malate dehydrogenase, cytoplasmic (EC 1.1.1.37) (Cytosolic malate dehydrogenase) (Diiodophenylpyruvate reductase) (EC 1.1.1.96)
MDH2	P40926	1	1	Malate dehydrogenase, mitochondrial (EC 1.1.1.37)
MED12L	Q86YW9	1	1	Mediator of RNA polymerase II transcription subunit 12-like protein (Mediator complex subunit 12-like protein) (Thyroid hormone receptor-associated-like protein) (Trinucleotide repeat-containing gene 11 protein-like)
MED16	Q9Y2X0	1	1	Mediator of RNA polymerase II transcription subunit 16 (Mediator complex subunit 16) (Thyroid hormone receptor-associated protein 5) (Thyroid hormone receptor-associated protein complex 95 kDa component) (Trap95) (Vitamin D3 receptor-interacting protein complex 92 kDa component) (DRIP92)
MEPCE	Q7L2J0	1	1	7SK snRNA methylphosphate capping enzyme (MePCE) (EC 2.1.1.-) (Bicoid-interacting protein 3 homolog) (Bin3 homolog)
MESDC2	Q14696	2	4	LDLR chaperone MESD (Mesoderm development candidate 2) (Mesoderm development protein) (Renal carcinoma antigen NY-REN-61)
METAP2	P50579	2	2	Methionine aminopeptidase 2 (MAP 2) (MetAP 2) (EC 3.4.11.18) (Initiation factor 2-associated 67 kDa glycoprotein) (p67) (p67eIF2) (Peptidase M)
METTL7B	Q6UX53	1	1	Methyltransferase-like protein 7B (EC 2.1.1.-)
MFSD1	H7C5U3	1	1	Major facilitator superfamily domain-containing protein 1
MFSD10	Q14728	1	1	Major facilitator superfamily domain-containing protein 10 (Tetracycline transporter-like protein)
MGST1	P10620	1	1	Microsomal glutathione S-transferase 1 (Microsomal GST-1) (EC 2.5.1.18) (Microsomal GST-I)
MIA3	Q5JRA6	1	1	Melanoma inhibitory activity protein 3 (C219-reactive peptide) (D320) (Transport and Golgi organization protein 1)
MICAL3	Q7RTP6	1	1	Protein-methionine sulfoxide oxidase MICAL3 (EC 1.14.13.-) (Molecule interacting with CasL protein 3) (MICAL-3)
MICU1	Q9BPX6	1	2	Calcium uptake protein 1, mitochondrial (Atopy-related autoantigen CALC) (ara CALC) (Calcium-binding atopy-related autoantigen 1) (allergen Hom s 4)
MINK1	Q8N4C8	1	1	Misshapen-like kinase 1 (EC 2.7.11.1) (GCK family kinase MiNK) (MAPK/ERK kinase kinase kinase 6) (MEK kinase kinase 6) (MEKKK 6) (Misshapen/NIK-related kinase) (Mitogen-activated protein kinase kinase kinase kinase 6)
MIPEP	Q99797	1	1	Mitochondrial intermediate peptidase (MIP) (EC 3.4.24.59)
MIS18BP1	Q6P0N0	1	1	Mis18-binding protein 1 (Kinetochore-associated protein KNL-2 homolog) (HsKNL-2) (P243)
MKI67	P46013	21	25	Antigen KI-67
MKL2	Q9ULH7	1	1	MKL/myocardin-like protein 2 (Megakaryoblastic leukemia 2) (Myocardin-related transcription factor B) (MRTF-B)
MKLN1	Q9UL63	1	1	Muskelin
MLEC	Q14165	1	1	Malectin
MLLT4	P55196	1	1	Afadin (ALL1-fused gene from chromosome 6 protein) (Protein AF-6)
MMP21	Q8N119	1	1	Matrix metalloproteinase-21 (MMP-21) (EC 3.4.24.-)
MOB1B	Q7L9L4	2	2	MOB kinase activator 1B (Mob1 homolog 1A) (Mob1A) (Mob1B) (Mps one binder kinase activator-like 1A)
MORF4L1	Q9UBU8	1	2	Mortality factor 4-like protein 1 (MORF-related gene 15 protein) (Protein MSL3-1) (Transcription factor-like protein MRG15)
MOSPD2	Q8NHP6	1	1	Motile sperm domain-containing protein 2
MOV10	Q9HCE1	3	3	Putative helicase MOV-10 (EC 3.6.4.13) (Moloney leukemia virus 10 protein)
MPDU1	O75352	1	1	Mannose-P-dolichol utilization defect 1 protein (Suppressor of Lec15 and Lec35 glycosylation mutation homolog) (SL15)
MPHOSPH10	O00566	1	1	U3 small nucleolar ribonucleoprotein protein MPP10 (M phase phosphoprotein 10)
MRPL13	Q9BYD1	1	1	39S ribosomal protein L13, mitochondrial (L13mt) (MRP-L13)
MRPL3	P09001	1	1	39S ribosomal protein L3, mitochondrial (L3mt) (MRP-L3)
MRPS18B	Q9Y676	1	1	28S ribosomal protein S18b, mitochondrial (MRP-S18-b) (Mrps18-b) (S18mt-b) (28S ribosomal protein S18-2, mitochondrial) (MRP-S18-2)
MRPS22	P82650	1	1	28S ribosomal protein S22, mitochondrial (MRP-S22) (S22mt)
MRPS25	P82663	1	1	28S ribosomal protein S25, mitochondrial (MRP-S25) (S25mt)
MRPS27	Q92552	1	1	28S ribosomal protein S27, mitochondrial (MRP-S27) (S27mt)
MRPS35	P82673	1	1	28S ribosomal protein S35, mitochondrial (MRP-S35) (S35mt) (28S ribosomal protein S28, mitochondrial) (MRP-S28) (S28mt)
MRPS5	P82675	2	3	28S ribosomal protein S5, mitochondrial (MRP-S5) (S5mt)
MRTO4	Q9UKD2	2	2	mRNA turnover protein 4 homolog
MSH6	P52701	1	2	DNA mismatch repair protein Msh6 (hMSH6) (G/T mismatch-binding protein) (GTBP) (GTMBP) (MutS-alpha 160 kDa subunit) (p160)
MTA1	Q13330	1	1	Metastasis-associated protein MTA1
MTCH1	Q9NZJ7	1	1	Mitochondrial carrier homolog 1 (Presenilin-associated protein)
MTCH2	Q9Y6C9	1	2	Mitochondrial carrier homolog 2 (Met-induced mitochondrial protein)
MTG1	Q9BT17	1	1	Mitochondrial ribosome-associated GTPase 1 (GTP-binding protein 7) (Mitochondrial GTPase 1)
MTHFD1L	Q6UB35	3	4	Monofunctional C1-tetrahydrofolate synthase, mitochondrial (EC 6.3.4.3) (Formyltetrahydrofolate synthetase)
MTIF2	P46199	1	2	Translation initiation factor IF-2, mitochondrial (IF-2(Mt)) (IF-2Mt) (IF2(mt))
MTPN	P58546	1	2	Myotrophin (Protein V-1)
MTTP	P55157	6	7	Microsomal triglyceride transfer protein large subunit
MTX2	O75431	1	1	Metaxin-2 (Mitochondrial outer membrane import complex protein 2)
MUL1	Q969V5	1	1	Mitochondrial ubiquitin ligase activator of NFKB 1 (EC 6.3.2.-) (E3 SUMO-protein ligase MUL1) (E3 ubiquitin-protein ligase MUL1) (Growth inhibition and death E3 ligase) (Mitochondrial-anchored protein ligase) (MAPL) (Putative NF-kappa-B-activating protein 266) (RING finger protein 218)
MVK	Q03426	1	1	Mevalonate kinase (MK) (EC 2.7.1.36)
MVP	Q14764	1	1	Major vault protein (MVP) (Lung resistance-related protein)
MYBBP1A	Q9BQG0	1	1	Myb-binding protein 1A
MYH10	P35580	7	8	Myosin-10 (Cellular myosin heavy chain, type B) (Myosin heavy chain 10) (Myosin heavy chain, non-muscle IIb) (Non-muscle myosin heavy chain B) (NMMHC-B) (Non-muscle myosin heavy chain IIb) (NMMHC II-b) (NMMHC-IIB)
MYH11	P35749	1	2	Myosin-11 (Myosin heavy chain 11) (Myosin heavy chain, smooth muscle isoform) (SMMHC)
MYH14	Q7Z406	1	1	Myosin-14 (Myosin heavy chain 14) (Myosin heavy chain, non-muscle IIc) (Non-muscle myosin heavy chain IIc) (NMHC II-C)
MYH9	P35579	15	17	Myosin-9 (Cellular myosin heavy chain, type A) (Myosin heavy chain 9) (Myosin heavy chain, non-muscle IIa) (Non-muscle myosin heavy chain A) (NMMHC-A) (Non-muscle myosin heavy chain IIa) (NMMHC II-a) (NMMHC-IIA)
MYO15B	Q96JP2	1	1	Unconventional myosin-XVB (Myosin XVBP) (Unconventional myosin-15B)
MYO1A	Q9UBC5	1	1	Unconventional myosin-Ia (Brush border myosin I) (BBM-I) (BBMI) (Myosin I heavy chain) (MIHC)
MYO1B	O43795	2	3	Unconventional myosin-Ib (MYH-1c) (Myosin I alpha) (MMI-alpha) (MMIa)
MYO1E	Q12965	1	1	Unconventional myosin-Ie (Myosin-Ic) (Unconventional myosin 1E)
MYO5C	Q9NQX4	1	2	Unconventional myosin-Vc
NAA35	Q5VZE5	1	1	N-alpha-acetyltransferase 35, NatC auxiliary subunit (Embryonic growth-associated protein homolog) (Protein MAK10 homolog)
NAA40	Q86UY6	1	1	N-alpha-acetyltransferase 40 (EC 2.3.1.-) (N-acetyltransferase 11) (NatD catalytic subunit)
NAA50	Q9GZZ1	2	2	N-alpha-acetyltransferase 50 (EC 2.3.1.-) (N-acetyltransferase 13) (N-acetyltransferase 5) (hNAT5) (N-acetyltransferase san homolog) (hSAN) (NatE catalytic subunit)
NACA	Q13765	2	2	Nascent polypeptide-associated complex subunit alpha (NAC-alpha) (Alpha-NAC) (allergen Hom s 2)
NADK	O95544	1	1	NAD kinase (EC 2.7.1.23) (Poly(P)/ATP NAD kinase)
NAP1L4	Q99733	1	1	Nucleosome assembly protein 1-like 4 (Nucleosome assembly protein 2) (NAP-2)
NAPA	P54920	1	1	Alpha-soluble NSF attachment protein (SNAP-alpha) (N-ethylmaleimide-sensitive factor attachment protein alpha)
NAPB	Q9H115	2	2	Beta-soluble NSF attachment protein (SNAP-beta) (N-ethylmaleimide-sensitive factor attachment protein beta)
NARS	O43776	2	2	Asparagine--tRNA ligase, cytoplasmic (EC 6.1.1.22) (Asparaginyl-tRNA synthetase) (AsnRS)
NCAPD3	P42695	1	1	Condensin-2 complex subunit D3 (Non-SMC condensin II complex subunit D3) (hCAP-D3)
NCAPG	Q9BPX3	2	2	Condensin complex subunit 3 (Chromosome-associated protein G) (Condensin subunit CAP-G) (hCAP-G) (Melanoma antigen NY-MEL-3) (Non-SMC condensin I complex subunit G) (XCAP-G homolog)
NCL	P19338	17	20	Nucleolin (Protein C23)
NDC80	O14777	1	1	Kinetochore protein NDC80 homolog (Highly expressed in cancer protein) (Kinetochore protein Hec1) (HsHec1) (Kinetochore-associated protein 2) (Retinoblastoma-associated protein HEC)
NDUFA4	O00483	2	2	NADH dehydrogenase [ubiquinone] 1 alpha subcomplex subunit 4 (Complex I-MLRQ) (CI-MLRQ) (NADH-ubiquinone oxidoreductase MLRQ subunit)
NDUFA7	O95182	1	1	NADH dehydrogenase [ubiquinone] 1 alpha subcomplex subunit 7 (Complex I-B14.5a) (CI-B14.5a) (NADH-ubiquinone oxidoreductase subunit B14.5a)
NDUFS1	P28331	1	1	NADH-ubiquinone oxidoreductase 75 kDa subunit, mitochondrial (EC 1.6.5.3) (EC 1.6.99.3) (Complex I-75kD) (CI-75kD)
NDUFS2	O75306	1	2	NADH dehydrogenase [ubiquinone] iron-sulfur protein 2, mitochondrial (EC 1.6.5.3) (EC 1.6.99.3) (Complex I-49kD) (CI-49kD) (NADH-ubiquinone oxidoreductase 49 kDa subunit)
NDUFV3	P56181	1	1	NADH dehydrogenase [ubiquinone] flavoprotein 3, mitochondrial (Complex I-9kD) (CI-9kD) (NADH-ubiquinone oxidoreductase 9 kDa subunit) (Renal carcinoma antigen NY-REN-4)
NELFB	Q8WX92	1	2	Negative elongation factor B (NELF-B) (Cofactor of BRCA1)
NEMF	O60524	1	1	Nuclear export mediator factor NEMF (Antigen NY-CO-1) (Serologically defined colon cancer antigen 1)
NFXL1	Q6ZNB6	1	2	NF-X1-type zinc finger protein NFXL1 (Ovarian zinc finger protein) (hOZFP)
NGEF	Q8N5V2	1	1	Ephexin-1 (Eph-interacting exchange protein) (Neuronal guanine nucleotide exchange factor)
NHP2L1	P55769	1	1	NHP2-like protein 1 (High mobility group-like nuclear protein 2 homolog 1) (OTK27) (SNU13 homolog) (hSNU13) (U4/U6.U5 tri-snRNP 15.5 kDa protein) [Cleaved into: NHP2-like protein 1, N-terminally processed]
NKAP	Q8N5F7	1	1	NF-kappa-B-activating protein
NME2	P22392	2	2	Nucleoside diphosphate kinase B (NDK B) (NDP kinase B) (EC 2.7.4.6) (C-myc purine-binding transcription factor PUF) (Histidine protein kinase NDKB) (EC 2.7.13.3) (nm23-H2)
NMNAT3	Q96T66	1	2	Nicotinamide mononucleotide adenylyltransferase 3 (NMN adenylyltransferase 3) (Nicotinate-nucleotide adenylyltransferase 3) (NaMN adenylyltransferase 3) (EC 2.7.7.18) (Pyridine nucleotide adenylyltransferase 3) (PNAT-3) (EC 2.7.7.1)
NMT1	P30419	1	1	Glycylpeptide N-tetradecanoyltransferase 1 (EC 2.3.1.97) (Myristoyl-CoA:protein N-myristoyltransferase 1) (NMT 1) (Type I N-myristoyltransferase) (Peptide N-myristoyltransferase 1)
NNT	Q13423	4	4	NAD(P) transhydrogenase, mitochondrial (EC 1.6.1.2) (Nicotinamide nucleotide transhydrogenase) (Pyridine nucleotide transhydrogenase)
NOC2L	Q9Y3T9	1	1	Nucleolar complex protein 2 homolog (Protein NOC2 homolog) (NOC2-like protein) (Novel INHAT repressor)
NOL6	Q9H6R4	1	1	Nucleolar protein 6 (Nucleolar RNA-associated protein) (Nrap)
NOL7	Q9UMY1	1	2	Nucleolar protein 7 (Nucleolar protein of 27 kDa)
NOL9	Q5SY16	1	2	Polynucleotide 5'-hydroxyl-kinase NOL9 (EC 2.7.1.-) (Nucleolar protein 9)
NOLC1	Q14978	6	7	Nucleolar and coiled-body phosphoprotein 1 (140 kDa nucleolar phosphoprotein) (Nopp140) (Hepatitis C virus NS5A-transactivated protein 13) (HCV NS5A-transactivated protein 13) (Nucleolar 130 kDa protein) (Nucleolar phosphoprotein p130)
NOP14	P78316	1	1	Nucleolar protein 14 (Nucleolar complex protein 14)
NOP16	Q9Y3C1	1	1	Nucleolar protein 16 (HBV pre-S2 trans-regulated protein 3)
NOP2	P46087	2	4	Putative ribosomal RNA methyltransferase NOP2 (EC 2.1.1.-) (Nucleolar protein 1) (Nucleolar protein 2 homolog) (Proliferating-cell nucleolar antigen p120) (Proliferation-associated nucleolar protein p120)
NOP56	O00567	3	4	Nucleolar protein 56 (Nucleolar protein 5A)
NOP58	Q9Y2X3	4	4	Nucleolar protein 58 (Nucleolar protein 5)
NPC2	P61916	1	1	Epididymal secretory protein E1 (Human epididymis-specific protein 1) (He1) (Niemann-Pick disease type C2 protein)
NPM1	P06748	6	6	Nucleophosmin (NPM) (Nucleolar phosphoprotein B23) (Nucleolar protein NO38) (Numatrin)
NQO1	P15559	4	10	NAD(P)H dehydrogenase [quinone] 1 (EC 1.6.5.2) (Azoreductase) (DT-diaphorase) (DTD) (Menadione reductase) (NAD(P)H:quinone oxidoreductase 1) (Phylloquinone reductase) (Quinone reductase 1) (QR1)
NRAS	P01111	1	1	GTPase NRas (Transforming protein N-Ras)
NRD1	O43847	1	1	Nardilysin (EC 3.4.24.61) (N-arginine dibasic convertase) (NRD convertase) (NRD-C)
NSF	P46459	1	1	Vesicle-fusing ATPase (EC 3.6.4.6) (N-ethylmaleimide-sensitive fusion protein) (NEM-sensitive fusion protein) (Vesicular-fusion protein NSF)
NSUN5	Q96P11	1	1	Putative methyltransferase NSUN5 (EC 2.1.1.-) (NOL1-related protein) (NOL1R) (NOL1/NOP2/Sun domain family member 5) (Williams-Beuren syndrome chromosomal region 20A protein)
NT5E	P21589	1	1	5'-nucleotidase (5'-NT) (EC 3.1.3.5) (Ecto-5'-nucleotidase) (CD antigen CD73)
NUDC	Q9Y266	2	4	Nuclear migration protein nudC (Nuclear distribution protein C homolog)
NUMA1	Q14980	3	4	Nuclear mitotic apparatus protein 1 (NuMA protein) (SP-H antigen)
NUP205	Q92621	1	1	Nuclear pore complex protein Nup205 (205 kDa nucleoporin) (Nucleoporin Nup205)
NUP98	P52948	1	1	Nuclear pore complex protein Nup98-Nup96 [Cleaved into: Nuclear pore complex protein Nup98 (98 kDa nucleoporin) (Nucleoporin Nup98) (Nup98); Nuclear pore complex protein Nup96 (96 kDa nucleoporin) (Nucleoporin Nup96) (Nup96)]
NUSAP1	Q9BXS6	2	3	Nucleolar and spindle-associated protein 1 (NuSAP)
OAT	P04181	3	4	Ornithine aminotransferase, mitochondrial (EC 2.6.1.13) (Ornithine delta-aminotransferase) (Ornithine--oxo-acid aminotransferase) [Cleaved into: Ornithine aminotransferase, hepatic form; Ornithine aminotransferase, renal form]
OCRL	Q01968	1	1	Inositol polyphosphate 5-phosphatase OCRL-1 (EC 3.1.3.36) (Lowe oculocerebrorenal syndrome protein)
OGDH	Q02218	2	2	2-oxoglutarate dehydrogenase, mitochondrial (EC 1.2.4.2) (2-oxoglutarate dehydrogenase complex component E1) (OGDC-E1) (Alpha-ketoglutarate dehydrogenase)
OLA1	Q9NTK5	3	3	Obg-like ATPase 1 (DNA damage-regulated overexpressed in cancer 45) (DOC45) (GTP-binding protein 9)
OMA1	Q96E52	1	2	Metalloendopeptidase OMA1, mitochondrial (EC 3.4.24.-) (Metalloprotease-related protein 1) (MPRP-1) (Overlapping with the m-AAA protease 1 homolog)
ORMDL2	Q53FV1	1	1	ORM1-like protein 2 (Adoplin-2)
OS9	Q13438	1	1	Protein OS-9 (Amplified in osteosarcoma 9)
OSBPL10	Q9BXB5	1	1	Oxysterol-binding protein-related protein 10 (ORP-10) (OSBP-related protein 10)
P4HA1	P13674	2	4	Prolyl 4-hydroxylase subunit alpha-1 (4-PH alpha-1) (EC 1.14.11.2) (Procollagen-proline,2-oxoglutarate-4-dioxygenase subunit alpha-1)
P4HB	P07237	1	1	Protein disulfide-isomerase (PDI) (EC 5.3.4.1) (Cellular thyroid hormone-binding protein) (Prolyl 4-hydroxylase subunit beta) (p55)
PA2G4	Q9UQ80	1	1	Proliferation-associated protein 2G4 (Cell cycle protein p38-2G4 homolog) (hG4-1) (ErbB3-binding protein 1)
PABPC1	P11940	2	3	Polyadenylate-binding protein 1 (PABP-1) (Poly(A)-binding protein 1)
PABPC4	Q13310	4	5	Polyadenylate-binding protein 4 (PABP-4) (Poly(A)-binding protein 4) (Activated-platelet protein 1) (APP-1) (Inducible poly(A)-binding protein) (iPABP)
PACS1	Q6VY07	1	1	Phosphofurin acidic cluster sorting protein 1 (PACS-1)
PACSIN2	Q9UNF0	1	2	Protein kinase C and casein kinase substrate in neurons protein 2 (Syndapin-2) (Syndapin-II)
PAFAH1B1	P43034	2	2	Platelet-activating factor acetylhydrolase IB subunit alpha (Lissencephaly-1 protein) (LIS-1) (PAF acetylhydrolase 45 kDa subunit) (PAF-AH 45 kDa subunit) (PAF-AH alpha) (PAFAH alpha)
PAICS	P22234	1	1	Multifunctional protein ADE2 [Includes: Phosphoribosylaminoimidazole-succinocarboxamide synthase (EC 6.3.2.6) (SAICAR synthetase); Phosphoribosylaminoimidazole carboxylase (EC 4.1.1.21) (AIR carboxylase) (AIRC)]
PAK2	Q13177	1	1	Serine/threonine-protein kinase PAK 2 (EC 2.7.11.1) (Gamma-PAK) (PAK65) (S6/H4 kinase) (p21-activated kinase 2) (PAK-2) (p58) [Cleaved into: PAK-2p27 (p27); PAK-2p34 (p34) (C-t-PAK2)]
PAM	P19021	1	1	Peptidyl-glycine alpha-amidating monooxygenase (PAM) [Includes: Peptidylglycine alpha-hydroxylating monooxygenase (PHM) (EC 1.14.17.3); Peptidyl-alpha-hydroxyglycine alpha-amidating lyase (EC 4.3.2.5) (Peptidylamidoglycolate lyase) (PAL)]
PAPOLA	P51003	1	2	Poly(A) polymerase alpha (PAP-alpha) (EC 2.7.7.19) (Polynucleotide adenylyltransferase alpha)
PAPSS1	O43252	2	2	Bifunctional 3'-phosphoadenosine 5'-phosphosulfate synthase 1 (PAPS synthase 1) (PAPSS 1) (Sulfurylase kinase 1) (SK 1) (SK1) [Includes: Sulfate adenylyltransferase (EC 2.7.7.4) (ATP-sulfurylase) (Sulfate adenylate transferase) (SAT); Adenylyl-sulfate kinase (EC 2.7.1.25) (3'-phosphoadenosine-5'-phosphosulfate synthase) (APS kinase) (Adenosine-5'-phosphosulfate 3'-phosphotransferase) (Adenylylsul…
PARD3	Q8TEW0	1	1	Partitioning defective 3 homolog (PAR-3) (PARD-3) (Atypical PKC isotype-specific-interacting protein) (ASIP) (CTCL tumor antigen se2-5) (PAR3-alpha)
PARK7	Q99497	3	3	Protein DJ-1 (EC 3.4.-.-) (Oncogene DJ1) (Parkinson disease protein 7)
PARP1	P09874	11	13	Poly [ADP-ribose] polymerase 1 (PARP-1) (EC 2.4.2.30) (ADP-ribosyltransferase diphtheria toxin-like 1) (ARTD1) (NAD(+) ADP-ribosyltransferase 1) (ADPRT 1) (Poly[ADP-ribose] synthase 1)
PCBP4	P57723	1	2	Poly(rC)-binding protein 4 (Alpha-CP4)
PCID2	Q5JVF3	2	2	PCI domain-containing protein 2 (CSN12-like protein)
PCK1	P35558	1	2	Phosphoenolpyruvate carboxykinase, cytosolic [GTP] (PEPCK-C) (EC 4.1.1.32) (Phosphoenolpyruvate carboxylase)
PCYOX1	Q9UHG3	2	3	Prenylcysteine oxidase 1 (EC 1.8.3.5) (Prenylcysteine lyase)
PCYT2	Q99447	1	1	Ethanolamine-phosphate cytidylyltransferase (EC 2.7.7.14) (CTP:phosphoethanolamine cytidylyltransferase) (Phosphorylethanolamine transferase)
PDAP1	Q13442	1	1	28 kDa heat- and acid-stable phosphoprotein (PDGF-associated protein) (PAP) (PDGFA-associated protein 1) (PAP1)
PDCD11	Q14690	1	1	Protein RRP5 homolog (NF-kappa-B-binding protein) (NFBP) (Programmed cell death protein 11)
PDCL3	Q9H2J4	1	1	Phosducin-like protein 3 (HTPHLP) (PhPL3) (Viral IAP-associated factor 1) (VIAF-1)
PDE12	Q6L8Q7	1	1	2',5'-phosphodiesterase 12 (2'-PDE) (2-PDE) (EC 3.1.4.-) (Mitochondrial deadenylase) (EC 3.1.13.4)
PDHA1	P08559	1	1	Pyruvate dehydrogenase E1 component subunit alpha, somatic form, mitochondrial (EC 1.2.4.1) (PDHE1-A type I)
PDIA3	P30101	5	7	Protein disulfide-isomerase A3 (EC 5.3.4.1) (58 kDa glucose-regulated protein) (58 kDa microsomal protein) (p58) (Disulfide isomerase ER-60) (Endoplasmic reticulum resident protein 57) (ER protein 57) (ERp57) (Endoplasmic reticulum resident protein 60) (ER protein 60) (ERp60)
PDIA4	P13667	5	5	Protein disulfide-isomerase A4 (EC 5.3.4.1) (Endoplasmic reticulum resident protein 70) (ER protein 70) (ERp70) (Endoplasmic reticulum resident protein 72) (ER protein 72) (ERp-72) (ERp72)
PDIA5	Q14554	4	4	Protein disulfide-isomerase A5 (EC 5.3.4.1) (Protein disulfide isomerase-related protein)
PDLIM5	Q96HC4	2	2	PDZ and LIM domain protein 5 (Enigma homolog) (Enigma-like PDZ and LIM domains protein)
PDXDC1	Q6P996	1	1	Pyridoxal-dependent decarboxylase domain-containing protein 1 (EC 4.1.1.-)
PEBP1	P30086	3	6	Phosphatidylethanolamine-binding protein 1 (PEBP-1) (HCNPpp) (Neuropolypeptide h3) (Prostatic-binding protein) (Raf kinase inhibitor protein) (RKIP) [Cleaved into: Hippocampal cholinergic neurostimulating peptide (HCNP)]
PECR	Q9BY49	2	3	Peroxisomal trans-2-enoyl-CoA reductase (TERP) (EC 1.3.1.38) (2,4-dienoyl-CoA reductase-related protein) (DCR-RP) (HPDHase) (pVI-ARL)
PEF1	Q9UBV8	1	1	Peflin (PEF protein with a long N-terminal hydrophobic domain) (Penta-EF hand domain-containing protein 1)
PEG10	Q86TG7	1	1	Retrotransposon-derived protein PEG10 (Embryonal carcinoma differentiation-regulated protein) (Mammalian retrotransposon-derived protein 2) (Myelin expression factor 3-like protein 1) (MEF3-like protein 1) (Paternally expressed gene 10 protein) (Retrotransposon gag domain-containing protein 3) (Retrotransposon-derived gag-like polyprotein) (Ty3/Gypsy-like protein)
PEG3	Q9GZU2	6	8	Paternally-expressed gene 3 protein (Zinc finger and SCAN domain-containing protein 24)
PFAS	O15067	1	1	Phosphoribosylformylglycinamidine synthase (FGAM synthase) (FGAMS) (EC 6.3.5.3) (Formylglycinamide ribotide amidotransferase) (FGARAT) (Formylglycinamide ribotide synthetase)
PFKL	P17858	1	2	6-phosphofructokinase, liver type (EC 2.7.1.11) (Phosphofructo-1-kinase isozyme B) (PFK-B) (Phosphofructokinase 1) (Phosphohexokinase)
PFN1	P07737	3	5	Profilin-1 (Epididymis tissue protein Li 184a) (Profilin I)
PGAM1	P18669	1	1	Phosphoglycerate mutase 1 (EC 3.1.3.13) (EC 5.4.2.11) (EC 5.4.2.4) (BPG-dependent PGAM 1) (Phosphoglycerate mutase isozyme B) (PGAM-B)
PGAM4	Q8N0Y7	2	3	Probable phosphoglycerate mutase 4 (EC 3.1.3.13) (EC 5.4.2.11) (EC 5.4.2.4)
PGD	P52209	8	9	6-phosphogluconate dehydrogenase, decarboxylating (EC 1.1.1.44)
PGK1	P00558	5	5	Phosphoglycerate kinase 1 (EC 2.7.2.3) (Cell migration-inducing gene 10 protein) (Primer recognition protein 2) (PRP 2)
PGM1	P36871	2	2	Phosphoglucomutase-1 (PGM 1) (EC 5.4.2.2) (Glucose phosphomutase 1)
PGM3	O95394	3	4	Phosphoacetylglucosamine mutase (PAGM) (EC 5.4.2.3) (Acetylglucosamine phosphomutase) (N-acetylglucosamine-phosphate mutase) (Phosphoglucomutase-3) (PGM 3)
PHB2	Q99623	1	1	Prohibitin-2 (B-cell receptor-associated protein BAP37) (D-prohibitin) (Repressor of estrogen receptor activity)
PHF14	O94880	1	1	PHD finger protein 14
PHF3	Q92576	1	1	PHD finger protein 3
PHF8	Q9UPP1	1	1	Histone lysine demethylase PHF8 (EC 1.14.11.27) (PHD finger protein 8)
PHGDH	O43175	2	4	D-3-phosphoglycerate dehydrogenase (3-PGDH) (EC 1.1.1.95)
PHKB	Q93100	1	2	Phosphorylase b kinase regulatory subunit beta (Phosphorylase kinase subunit beta)
PHRF1	Q9P1Y6	1	1	PHD and RING finger domain-containing protein 1
PHYH	O14832	1	1	Phytanoyl-CoA dioxygenase, peroxisomal (EC 1.14.11.18) (Phytanic acid oxidase) (Phytanoyl-CoA alpha-hydroxylase) (PhyH)
PHYHIPL	Q96FC7	1	1	Phytanoyl-CoA hydroxylase-interacting protein-like
PIAS1	O75925	1	1	E3 SUMO-protein ligase PIAS1 (EC 6.3.2.-) (DEAD/H box-binding protein 1) (Gu-binding protein) (GBP) (Protein inhibitor of activated STAT protein 1) (RNA helicase II-binding protein)
PICALM	Q13492	1	2	Phosphatidylinositol-binding clathrin assembly protein (Clathrin assembly lymphoid myeloid leukemia protein)
PIGT	Q969N2	1	1	GPI transamidase component PIG-T (Phosphatidylinositol-glycan biosynthesis class T protein)
PIK3CB	P42338	1	1	Phosphatidylinositol 4,5-bisphosphate 3-kinase catalytic subunit beta isoform (PI3-kinase subunit beta) (PI3K-beta) (PI3Kbeta) (PtdIns-3-kinase subunit beta) (EC 2.7.1.153) (Phosphatidylinositol 4,5-bisphosphate 3-kinase 110 kDa catalytic subunit beta) (PtdIns-3-kinase subunit p110-beta) (p110beta)
PIN4	Q9Y237	1	1	Peptidyl-prolyl cis-trans isomerase NIMA-interacting 4 (EC 5.2.1.8) (Parvulin-14) (Par14) (hPar14) (Parvulin-17) (Par17) (hPar17) (Peptidyl-prolyl cis-trans isomerase Pin4) (PPIase Pin4) (Peptidyl-prolyl cis/trans isomerase EPVH) (hEPVH) (Rotamase Pin4)
PIPOX	Q9P0Z9	1	1	Peroxisomal sarcosine oxidase (PSO) (EC 1.5.3.1) (EC 1.5.3.7) (L-pipecolate oxidase) (L-pipecolic acid oxidase)
PITPNB	P48739	1	1	Phosphatidylinositol transfer protein beta isoform (PI-TP-beta) (PtdIns transfer protein beta) (PtdInsTP beta)
PKLR	P30613	1	5	Pyruvate kinase PKLR (EC 2.7.1.40) (Pyruvate kinase 1) (Pyruvate kinase isozymes L/R) (R-type/L-type pyruvate kinase) (Red cell/liver pyruvate kinase)
PKM	P14618	8	13	Pyruvate kinase PKM (EC 2.7.1.40) (Cytosolic thyroid hormone-binding protein) (CTHBP) (Opa-interacting protein 3) (OIP-3) (Pyruvate kinase 2/3) (Pyruvate kinase muscle isozyme) (Thyroid hormone-binding protein 1) (THBP1) (Tumor M2-PK) (p58)
PLCG1	P19174	1	1	1-phosphatidylinositol 4,5-bisphosphate phosphodiesterase gamma-1 (EC 3.1.4.11) (PLC-148) (Phosphoinositide phospholipase C-gamma-1) (Phospholipase C-II) (PLC-II) (Phospholipase C-gamma-1) (PLC-gamma-1)
PLD1	Q13393	1	1	Phospholipase D1 (PLD 1) (hPLD1) (EC 3.1.4.4) (Choline phosphatase 1) (Phosphatidylcholine-hydrolyzing phospholipase D1)
PLIN2	Q99541	4	6	Perilipin-2 (Adipophilin) (Adipose differentiation-related protein) (ADRP)
PLK1	P53350	2	2	Serine/threonine-protein kinase PLK1 (EC 2.7.11.21) (Polo-like kinase 1) (PLK-1) (Serine/threonine-protein kinase 13) (STPK13)
PLOD1	Q02809	3	4	Procollagen-lysine,2-oxoglutarate 5-dioxygenase 1 (EC 1.14.11.4) (Lysyl hydroxylase 1) (LH1)
PLOD2	O00469	4	7	Procollagen-lysine,2-oxoglutarate 5-dioxygenase 2 (EC 1.14.11.4) (Lysyl hydroxylase 2) (LH2)
PLXNB2	O15031	1	1	Plexin-B2 (MM1)
POLDIP3	Q9BY77	1	1	Polymerase delta-interacting protein 3 (46 kDa DNA polymerase delta interaction protein) (p46) (S6K1 Aly/REF-like target) (SKAR)
POLR1A	O95602	1	1	DNA-directed RNA polymerase I subunit RPA1 (RNA polymerase I subunit A1) (EC 2.7.7.6) (A190) (DNA-directed RNA polymerase I largest subunit) (DNA-directed RNA polymerase I subunit A) (RNA polymerase I 194 kDa subunit) (RPA194)
POLR2A	P24928	2	2	DNA-directed RNA polymerase II subunit RPB1 (RNA polymerase II subunit B1) (EC 2.7.7.6) (DNA-directed RNA polymerase II subunit A) (DNA-directed RNA polymerase III largest subunit) (RNA-directed RNA polymerase II subunit RPB1) (EC 2.7.7.48)
POLR2B	P30876	1	2	DNA-directed RNA polymerase II subunit RPB2 (EC 2.7.7.6) (DNA-directed RNA polymerase II 140 kDa polypeptide) (DNA-directed RNA polymerase II subunit B) (RNA polymerase II subunit 2) (RNA polymerase II subunit B2)
POLR2G	P62487	1	1	DNA-directed RNA polymerase II subunit RPB7 (RNA polymerase II subunit B7) (DNA-directed RNA polymerase II subunit G) (RNA polymerase II 19 kDa subunit) (RPB19)
POLR3C	Q9BUI4	1	1	DNA-directed RNA polymerase III subunit RPC3 (RNA polymerase III subunit C3) (DNA-directed RNA polymerase III subunit C) (RNA polymerase III 62 kDa subunit) (RPC62)
PON1	P27169	1	1	Serum paraoxonase/arylesterase 1 (PON 1) (EC 3.1.1.2) (EC 3.1.1.81) (EC 3.1.8.1) (Aromatic esterase 1) (A-esterase 1) (K-45) (Serum aryldialkylphosphatase 1)
POR	P16435	3	5	NADPH--cytochrome P450 reductase (CPR) (P450R) (EC 1.6.2.4)
POTEE	Q6S8J3	2	6	POTE ankyrin domain family member E (ANKRD26-like family C member 1A) (Prostate, ovary, testis-expressed protein on chromosome 2) (POTE-2)
PPCS	Q9HAB8	1	1	Phosphopantothenate--cysteine ligase (EC 6.3.2.5) (Phosphopantothenoylcysteine synthetase) (PPC synthetase)
PPIA	P62937	2	2	Peptidyl-prolyl cis-trans isomerase A (PPIase A) (EC 5.2.1.8) (Cyclophilin A) (Cyclosporin A-binding protein) (Rotamase A) [Cleaved into: Peptidyl-prolyl cis-trans isomerase A, N-terminally processed]
PPIAL4D	F5H2F4	1	1	Peptidyl-prolyl cis-trans isomerase A-like 4D (PPIase A-like 4D) (EC 5.2.1.8)
PPIB	P23284	4	8	Peptidyl-prolyl cis-trans isomerase B (PPIase B) (EC 5.2.1.8) (CYP-S1) (Cyclophilin B) (Rotamase B) (S-cyclophilin) (SCYLP)
PPP1R10	Q96QC0	2	2	Serine/threonine-protein phosphatase 1 regulatory subunit 10 (MHC class I region proline-rich protein CAT53) (PP1-binding protein of 114 kDa) (Phosphatase 1 nuclear targeting subunit) (Protein FB19) (p99)
PPP2CA	P67775	1	1	Serine/threonine-protein phosphatase 2A catalytic subunit alpha isoform (PP2A-alpha) (EC 3.1.3.16) (Replication protein C) (RP-C)
PPP2R4	Q15257	1	1	Serine/threonine-protein phosphatase 2A activator (EC 5.2.1.8) (PP2A, subunit B', PR53 isoform) (Phosphotyrosyl phosphatase activator) (PTPA) (Serine/threonine-protein phosphatase 2A regulatory subunit 4) (Serine/threonine-protein phosphatase 2A regulatory subunit B')
PPP4R2	Q9NY27	1	1	Serine/threonine-protein phosphatase 4 regulatory subunit 2
PPP6R2	O75170	1	1	Serine/threonine-protein phosphatase 6 regulatory subunit 2 (SAPS domain family member 2)
PRDM10	Q9NQV6	2	2	PR domain zinc finger protein 10 (EC 2.1.1.-) (PR domain-containing protein 10) (Tristanin)
PRDX1	Q06830	1	1	Peroxiredoxin-1 (EC 1.11.1.15) (Natural killer cell-enhancing factor A) (NKEF-A) (Proliferation-associated gene protein) (PAG) (Thioredoxin peroxidase 2) (Thioredoxin-dependent peroxide reductase 2)
PREP	P48147	1	1	Prolyl endopeptidase (PE) (EC 3.4.21.26) (Post-proline cleaving enzyme)
PRIM2	P49643	1	1	DNA primase large subunit (EC 2.7.7.-) (DNA primase 58 kDa subunit) (p58)
PRKCA	P17252	3	3	Protein kinase C alpha type (PKC-A) (PKC-alpha) (EC 2.7.11.13)
PRKDC	P78527	6	7	DNA-dependent protein kinase catalytic subunit (DNA-PK catalytic subunit) (DNA-PKcs) (EC 2.7.11.1) (DNPK1) (p460)
PRMT1	Q99873	2	3	Protein arginine N-methyltransferase 1 (EC 2.1.1.-) (Histone-arginine N-methyltransferase PRMT1) (EC 2.1.1.125) (Interferon receptor 1-bound protein 4)
PRPF31	Q8WWY3	2	2	U4/U6 small nuclear ribonucleoprotein Prp31 (Pre-mRNA-processing factor 31) (Serologically defined breast cancer antigen NY-BR-99) (U4/U6 snRNP 61 kDa protein) (Protein 61K) (hPrp31)
PRPF4	O43172	2	2	U4/U6 small nuclear ribonucleoprotein Prp4 (PRP4 homolog) (hPrp4) (U4/U6 snRNP 60 kDa protein) (WD splicing factor Prp4)
PRPF40A	O75400	1	1	Pre-mRNA-processing factor 40 homolog A (Fas ligand-associated factor 1) (Formin-binding protein 11) (Formin-binding protein 3) (Huntingtin yeast partner A) (Huntingtin-interacting protein 10) (HIP-10) (Huntingtin-interacting protein A) (Renal carcinoma antigen NY-REN-6)
PRPF8	Q6P2Q9	7	7	Pre-mRNA-processing-splicing factor 8 (220 kDa U5 snRNP-specific protein) (PRP8 homolog) (Splicing factor Prp8) (p220)
PRR14	Q9BWN1	1	1	Proline-rich protein 14
PRRC2C	Q9Y520	1	1	Protein PRRC2C (BAT2 domain-containing protein 1) (HBV X-transactivated gene 2 protein) (HBV XAg-transactivated protein 2) (HLA-B-associated transcript 2-like 2) (Proline-rich and coiled-coil-containing protein 2C)
PSAT1	Q9Y617	4	4	Phosphoserine aminotransferase (EC 2.6.1.52) (Phosphohydroxythreonine aminotransferase) (PSAT)
PSIP1	O75475	1	1	PC4 and SFRS1-interacting protein (CLL-associated antigen KW-7) (Dense fine speckles 70 kDa protein) (DFS 70) (Lens epithelium-derived growth factor) (Transcriptional coactivator p75/p52)
PSMA1	P25786	2	3	Proteasome subunit alpha type-1 (EC 3.4.25.1) (30 kDa prosomal protein) (PROS-30) (Macropain subunit C2) (Multicatalytic endopeptidase complex subunit C2) (Proteasome component C2) (Proteasome nu chain)
PSMA3	P25788	2	2	Proteasome subunit alpha type-3 (EC 3.4.25.1) (Macropain subunit C8) (Multicatalytic endopeptidase complex subunit C8) (Proteasome component C8)
PSMA4	P25789	1	2	Proteasome subunit alpha type-4 (EC 3.4.25.1) (Macropain subunit C9) (Multicatalytic endopeptidase complex subunit C9) (Proteasome component C9) (Proteasome subunit L)
PSMA8	Q8TAA3	1	1	Proteasome subunit alpha type-7-like (EC 3.4.25.1)
PSMB1	P20618	2	2	Proteasome subunit beta type-1 (EC 3.4.25.1) (Macropain subunit C5) (Multicatalytic endopeptidase complex subunit C5) (Proteasome component C5) (Proteasome gamma chain)
PSMC1	P62191	4	6	26S protease regulatory subunit 4 (P26s4) (26S proteasome AAA-ATPase subunit RPT2) (Proteasome 26S subunit ATPase 1)
PSMC2	P35998	2	3	26S protease regulatory subunit 7 (26S proteasome AAA-ATPase subunit RPT1) (Proteasome 26S subunit ATPase 2) (Protein MSS1)
PSMC6	P62333	1	1	26S protease regulatory subunit 10B (26S proteasome AAA-ATPase subunit RPT4) (Proteasome 26S subunit ATPase 6) (Proteasome subunit p42)
PSMD11	O00231	1	1	26S proteasome non-ATPase regulatory subunit 11 (26S proteasome regulatory subunit RPN6) (26S proteasome regulatory subunit S9) (26S proteasome regulatory subunit p44.5)
PSMD2	Q13200	2	2	26S proteasome non-ATPase regulatory subunit 2 (26S proteasome regulatory subunit RPN1) (26S proteasome regulatory subunit S2) (26S proteasome subunit p97) (Protein 55.11) (Tumor necrosis factor type 1 receptor-associated protein 2)
PSME2	Q9UL46	1	1	Proteasome activator complex subunit 2 (11S regulator complex subunit beta) (REG-beta) (Activator of multicatalytic protease subunit 2) (Proteasome activator 28 subunit beta) (PA28b) (PA28beta)
PSMG2	Q969U7	1	1	Proteasome assembly chaperone 2 (PAC-2) (Hepatocellular carcinoma-susceptibility protein 3) (Tumor necrosis factor superfamily member 5-induced protein 1)
PSPC1	Q8WXF1	1	1	Paraspeckle component 1 (Paraspeckle protein 1)
PTBP1	P26599	1	1	Polypyrimidine tract-binding protein 1 (PTB) (57 kDa RNA-binding protein PPTB-1) (Heterogeneous nuclear ribonucleoprotein I) (hnRNP I)
PTBP3	O95758	4	4	Polypyrimidine tract-binding protein 3 (Regulator of differentiation 1) (Rod1)
PTCD3	Q96EY7	1	1	Pentatricopeptide repeat domain-containing protein 3, mitochondrial (28S ribosomal protein S39, mitochondrial) (MRP-S39) (Transformation-related gene 15 protein) (TRG-15)
PTEN	P60484	1	1	Phosphatidylinositol 3,4,5-trisphosphate 3-phosphatase and dual-specificity protein phosphatase PTEN (EC 3.1.3.16) (EC 3.1.3.48) (EC 3.1.3.67) (Mutated in multiple advanced cancers 1) (Phosphatase and tensin homolog)
PTGES2	Q9H7Z7	1	1	Prostaglandin E synthase 2 (EC 4.1.2.-) (EC 5.3.99.3) (Microsomal prostaglandin E synthase 2) (mPGES-2) [Cleaved into: Prostaglandin E synthase 2 truncated form]
PTGES3	Q15185	1	2	Prostaglandin E synthase 3 (EC 5.3.99.3) (Cytosolic prostaglandin E2 synthase) (cPGES) (Hsp90 co-chaperone) (Progesterone receptor complex p23) (Telomerase-binding protein p23)
PTPN1	P18031	2	2	Tyrosine-protein phosphatase non-receptor type 1 (EC 3.1.3.48) (Protein-tyrosine phosphatase 1B) (PTP-1B)
PTPN11	Q06124	2	2	Tyrosine-protein phosphatase non-receptor type 11 (EC 3.1.3.48) (Protein-tyrosine phosphatase 1D) (PTP-1D) (Protein-tyrosine phosphatase 2C) (PTP-2C) (SH-PTP2) (SHP-2) (Shp2) (SH-PTP3)
PTPN9	P43378	1	1	Tyrosine-protein phosphatase non-receptor type 9 (EC 3.1.3.48) (Protein-tyrosine phosphatase MEG2) (PTPase MEG2)
PTPRK	Q15262	1	1	Receptor-type tyrosine-protein phosphatase kappa (Protein-tyrosine phosphatase kappa) (R-PTP-kappa) (EC 3.1.3.48)
PTTG1IP	P53801	1	2	Pituitary tumor-transforming gene 1 protein-interacting protein (Pituitary tumor-transforming gene protein-binding factor) (PBF) (PTTG-binding factor)
PUF60	Q9UHX1	3	3	Poly(U)-binding-splicing factor PUF60 (60 kDa poly(U)-binding-splicing factor) (FUSE-binding protein-interacting repressor) (FBP-interacting repressor) (Ro-binding protein 1) (RoBP1) (Siah-binding protein 1) (Siah-BP1)
PUM2	Q8TB72	1	1	Pumilio homolog 2 (Pumilio-2)
PUS1	Q9Y606	1	2	tRNA pseudouridine synthase A, mitochondrial (EC 5.4.99.12) (tRNA pseudouridine(38-40) synthase) (tRNA pseudouridylate synthase I) (tRNA-uridine isomerase I)
PXN	P49023	1	1	Paxillin
PYCR1	P32322	1	6	Pyrroline-5-carboxylate reductase 1, mitochondrial (P5C reductase 1) (P5CR 1) (EC 1.5.1.2)
PYCR2	Q96C36	1	1	Pyrroline-5-carboxylate reductase 2 (P5C reductase 2) (P5CR 2) (EC 1.5.1.2)
PYGB	P11216	1	1	Glycogen phosphorylase, brain form (EC 2.4.1.1)
PYGL	P06737	2	3	Glycogen phosphorylase, liver form (EC 2.4.1.1)
QARS	P47897	2	2	Glutamine--tRNA ligase (EC 6.1.1.18) (Glutaminyl-tRNA synthetase) (GlnRS)
QPRT	Q15274	1	1	Nicotinate-nucleotide pyrophosphorylase [carboxylating] (EC 2.4.2.19) (Quinolinate phosphoribosyltransferase [decarboxylating]) (QAPRTase) (QPRTase)
QRICH2	Q9H0J4	1	1	Glutamine-rich protein 2
RAB10	P61026	1	1	Ras-related protein Rab-10
RAB14	P61106	2	3	Ras-related protein Rab-14
RAB17	Q9H0T7	1	1	Ras-related protein Rab-17
RAB1A	P62820	1	1	Ras-related protein Rab-1A (YPT1-related protein)
RAB21	Q9UL25	1	1	Ras-related protein Rab-21
RAB2B	Q8WUD1	1	1	Ras-related protein Rab-2B
RAB35	Q15286	1	1	Ras-related protein Rab-35 (GTP-binding protein RAY) (Ras-related protein Rab-1C)
RAB3C	Q96E17	1	1	Ras-related protein Rab-3C
RAB3GAP2	Q9H2M9	2	2	Rab3 GTPase-activating protein non-catalytic subunit (RGAP-iso) (Rab3 GTPase-activating protein 150 kDa subunit) (Rab3-GAP p150) (Rab3-GAP150) (Rab3-GAP regulatory subunit)
RAB7A	P51149	2	2	Ras-related protein Rab-7a
RAB8A	P61006	3	3	Ras-related protein Rab-8A (Oncogene c-mel)
RAD50	Q92878	1	1	DNA repair protein RAD50 (hRAD50) (EC 3.6.-.-)
RAE1	P78406	1	1	mRNA export factor (Rae1 protein homolog) (mRNA-associated protein mrnp 41)
RALB	P11234	2	2	Ras-related protein Ral-B
RALY	Q9UKM9	1	1	RNA-binding protein Raly (Autoantigen p542) (Heterogeneous nuclear ribonucleoprotein C-like 2) (hnRNP core protein C-like 2) (hnRNP associated with lethal yellow protein homolog)
RAN	P62826	3	4	GTP-binding nuclear protein Ran (Androgen receptor-associated protein 24) (GTPase Ran) (Ras-like protein TC4) (Ras-related nuclear protein)
RANBP2	P49792	3	3	E3 SUMO-protein ligase RanBP2 (EC 6.3.2.-) (358 kDa nucleoporin) (Nuclear pore complex protein Nup358) (Nucleoporin Nup358) (Ran-binding protein 2) (RanBP2) (p270)
RANBP3	Q9H6Z4	1	1	Ran-binding protein 3 (RanBP3)
RAP1A	P62834	1	3	Ras-related protein Rap-1A (C21KG) (G-22K) (GTP-binding protein smg p21A) (Ras-related protein Krev-1)
RAP2B	P61225	1	1	Ras-related protein Rap-2b
RAP2C	Q9Y3L5	1	1	Ras-related protein Rap-2c
RAPGEFL1	Q9UHV5	1	2	Rap guanine nucleotide exchange factor-like 1 (Link guanine nucleotide exchange factor II) (Link GEFII)
RARS	P54136	1	1	Arginine--tRNA ligase, cytoplasmic (EC 6.1.1.19) (Arginyl-tRNA synthetase) (ArgRS)
RBBP6	Q7Z6E9	1	1	E3 ubiquitin-protein ligase RBBP6 (EC 6.3.2.-) (Proliferation potential-related protein) (Protein P2P-R) (Retinoblastoma-binding Q protein 1) (RBQ-1) (Retinoblastoma-binding protein 6) (p53-associated cellular protein of testis)
RBM14	Q96PK6	1	1	RNA-binding protein 14 (Paraspeckle protein 2) (PSP2) (RNA-binding motif protein 14) (RRM-containing coactivator activator/modulator) (Synaptotagmin-interacting protein) (SYT-interacting protein)
RBM19	Q9Y4C8	1	1	Probable RNA-binding protein 19 (RNA-binding motif protein 19)
RBM25	P49756	3	3	RNA-binding protein 25 (Arg/Glu/Asp-rich protein of 120 kDa) (RED120) (Protein S164) (RNA-binding motif protein 25) (RNA-binding region-containing protein 7)
RBM28	Q9NW13	6	6	RNA-binding protein 28 (RNA-binding motif protein 28)
RBM5	P52756	1	1	RNA-binding protein 5 (Protein G15) (Putative tumor suppressor LUCA15) (RNA-binding motif protein 5) (Renal carcinoma antigen NY-REN-9)
RBM6	P78332	1	2	RNA-binding protein 6 (Lung cancer antigen NY-LU-12) (Protein G16) (RNA-binding motif protein 6) (RNA-binding protein DEF-3)
RBM8A	Q9Y5S9	2	2	RNA-binding protein 8A (Binder of OVCA1-1) (BOV-1) (RNA-binding motif protein 8A) (RNA-binding protein Y14) (Ribonucleoprotein RBM8A)
RBMX	P38159	2	2	RNA-binding motif protein, X chromosome (Glycoprotein p43) (Heterogeneous nuclear ribonucleoprotein G) (hnRNP G) [Cleaved into: RNA-binding motif protein, X chromosome, N-terminally processed]
RCC2	Q9P258	2	2	Protein RCC2 (RCC1-like protein TD-60) (Telophase disk protein of 60 kDa)
RDH11	Q8TC12	3	4	Retinol dehydrogenase 11 (EC 1.1.1.300) (Androgen-regulated short-chain dehydrogenase/reductase 1) (HCV core-binding protein HCBP12) (Prostate short-chain dehydrogenase/reductase 1) (Retinal reductase 1) (RalR1)
RDX	P35241	6	7	Radixin
REEP3	Q6NUK4	2	2	Receptor expression-enhancing protein 3
REEP5	Q00765	1	1	Receptor expression-enhancing protein 5 (Polyposis locus protein 1) (Protein TB2)
RETSAT	Q6NUM9	5	7	All-trans-retinol 13,14-reductase (EC 1.3.99.23) (All-trans-13,14-dihydroretinol saturase) (RetSat) (PPAR-alpha-regulated and starvation-induced gene protein)
RFC1	P35251	4	4	Replication factor C subunit 1 (Activator 1 140 kDa subunit) (A1 140 kDa subunit) (Activator 1 large subunit) (Activator 1 subunit 1) (DNA-binding protein PO-GA) (Replication factor C 140 kDa subunit) (RF-C 140 kDa subunit) (RFC140) (Replication factor C large subunit)
RHOB	P62745	1	1	Rho-related GTP-binding protein RhoB (Rho cDNA clone 6) (h6)
RHOC	P08134	2	3	Rho-related GTP-binding protein RhoC (Rho cDNA clone 9) (h9)
RIF1	Q5UIP0	2	2	Telomere-associated protein RIF1 (Rap1-interacting factor 1 homolog)
RNF114	Q9Y508	1	1	RING finger protein 114 (Zinc finger protein 228) (Zinc finger protein 313)
RNF213	Q63HN8	1	1	E3 ubiquitin-protein ligase RNF213 (EC 6.3.2.-) (ALK lymphoma oligomerization partner on chromosome 17) (Mysterin) (RING finger protein 213)
RNF25	Q96BH1	1	1	E3 ubiquitin-protein ligase RNF25 (EC 6.3.2.-) (RING finger protein 25)
RNMT	O43148	3	5	mRNA cap guanine-N7 methyltransferase (EC 2.1.1.56) (RG7MT1) (mRNA (guanine-N(7)-)-methyltransferase) (mRNA cap methyltransferase) (hCMT1) (hMet) (hcm1p)
RNPS1	Q15287	1	1	RNA-binding protein with serine-rich domain 1 (SR-related protein LDC2)
ROCK2	O75116	1	1	Rho-associated protein kinase 2 (EC 2.7.11.1) (Rho kinase 2) (Rho-associated, coiled-coil-containing protein kinase 2) (Rho-associated, coiled-coil-containing protein kinase II) (ROCK-II) (p164 ROCK-2)
RPA1	P27694	2	3	Replication protein A 70 kDa DNA-binding subunit (RP-A p70) (Replication factor A protein 1) (RF-A protein 1) (Single-stranded DNA-binding protein) [Cleaved into: Replication protein A 70 kDa DNA-binding subunit, N-terminally processed]
RPL10A	P62906	1	3	60S ribosomal protein L10a (CSA-19) (Neural precursor cell expressed developmentally down-regulated protein 6) (NEDD-6)
RPL12	P30050	3	3	60S ribosomal protein L12
RPL13	P26373	4	7	60S ribosomal protein L13 (Breast basic conserved protein 1)
RPL13A	P40429	3	3	60S ribosomal protein L13a (23 kDa highly basic protein)
RPL14	P50914	1	1	60S ribosomal protein L14 (CAG-ISL 7)
RPL18	Q07020	1	1	60S ribosomal protein L18
RPL18A	Q02543	1	1	60S ribosomal protein L18a
RPL23	P62829	1	1	60S ribosomal protein L23 (60S ribosomal protein L17)
RPL23A	P62750	4	7	60S ribosomal protein L23a
RPL24	P83731	1	2	60S ribosomal protein L24 (60S ribosomal protein L30)
RPL26	P61254	1	1	60S ribosomal protein L26
RPL27	P61353	1	1	60S ribosomal protein L27
RPL28	P46779	1	2	60S ribosomal protein L28
RPL29	P47914	1	4	60S ribosomal protein L29 (Cell surface heparin-binding protein HIP)
RPL3	P39023	5	7	60S ribosomal protein L3 (HIV-1 TAR RNA-binding protein B) (TARBP-B)
RPL30	P62888	1	1	60S ribosomal protein L30
RPL32	P62910	1	3	60S ribosomal protein L32
RPL34	P49207	1	2	60S ribosomal protein L34
RPL35	P42766	2	2	60S ribosomal protein L35
RPL35A	P18077	1	5	60S ribosomal protein L35a (Cell growth-inhibiting gene 33 protein)
RPL37	P61927	1	2	60S ribosomal protein L37 (G1.16)
RPL4	P36578	7	15	60S ribosomal protein L4 (60S ribosomal protein L1)
RPL5	P46777	2	2	60S ribosomal protein L5
RPL6	Q02878	5	8	60S ribosomal protein L6 (Neoplasm-related protein C140) (Tax-responsive enhancer element-binding protein 107) (TaxREB107)
RPL7	P18124	3	3	60S ribosomal protein L7
RPL7A	P62424	4	5	60S ribosomal protein L7a (PLA-X polypeptide) (Surfeit locus protein 3)
RPL7L1	Q6DKI1	2	2	60S ribosomal protein L7-like 1
RPL8	P62917	1	2	60S ribosomal protein L8
RPL9	P32969	1	2	60S ribosomal protein L9
RPLP0	P05388	1	1	60S acidic ribosomal protein P0 (60S ribosomal protein L10E)
RPLP0P6	Q8NHW5	1	1	60S acidic ribosomal protein P0-like
RPN1	P04843	4	9	Dolichyl-diphosphooligosaccharide--protein glycosyltransferase subunit 1 (EC 2.4.99.18) (Dolichyl-diphosphooligosaccharide--protein glycosyltransferase 67 kDa subunit) (Ribophorin I) (RPN-I) (Ribophorin-1)
RPS11	P62280	2	5	40S ribosomal protein S11
RPS13	P62277	1	1	40S ribosomal protein S13
RPS15A	P62244	1	1	40S ribosomal protein S15a
RPS16	P62249	3	5	40S ribosomal protein S16
RPS17L	P0CW22	1	1	40S ribosomal protein S17-like
RPS18	P62269	3	3	40S ribosomal protein S18 (Ke-3) (Ke3)
RPS19	P39019	1	1	40S ribosomal protein S19
RPS2	P15880	4	6	40S ribosomal protein S2 (40S ribosomal protein S4) (Protein LLRep3)
RPS20	P60866	1	1	40S ribosomal protein S20
RPS23	P62266	2	2	40S ribosomal protein S23
RPS24	P62847	1	2	40S ribosomal protein S24
RPS29	P62273	1	1	40S ribosomal protein S29
RPS3	P23396	2	2	40S ribosomal protein S3
RPS3A	P61247	6	9	40S ribosomal protein S3a (v-fos transformation effector protein) (Fte-1)
RPS4X	P62701	3	3	40S ribosomal protein S4, X isoform (SCR10) (Single copy abundant mRNA protein)
RPS5	P46782	3	3	40S ribosomal protein S5 [Cleaved into: 40S ribosomal protein S5, N-terminally processed]
RPS6	P62753	3	7	40S ribosomal protein S6 (Phosphoprotein NP33)
RPS6KA1	Q15418	1	2	Ribosomal protein S6 kinase alpha-1 (S6K-alpha-1) (EC 2.7.11.1) (90 kDa ribosomal protein S6 kinase 1) (p90-RSK 1) (p90RSK1) (p90S6K) (MAP kinase-activated protein kinase 1a) (MAPK-activated protein kinase 1a) (MAPKAP kinase 1a) (MAPKAPK-1a) (Ribosomal S6 kinase 1) (RSK-1)
RPS6KA2	Q15349	2	2	Ribosomal protein S6 kinase alpha-2 (S6K-alpha-2) (EC 2.7.11.1) (90 kDa ribosomal protein S6 kinase 2) (p90-RSK 2) (p90RSK2) (MAP kinase-activated protein kinase 1c) (MAPK-activated protein kinase 1c) (MAPKAP kinase 1c) (MAPKAPK-1c) (Ribosomal S6 kinase 3) (RSK-3) (pp90RSK3)
RPS6KA6	Q9UK32	1	1	Ribosomal protein S6 kinase alpha-6 (S6K-alpha-6) (EC 2.7.11.1) (90 kDa ribosomal protein S6 kinase 6) (p90-RSK 6) (p90RSK6) (Ribosomal S6 kinase 4) (RSK-4) (pp90RSK4)
RPS7	P62081	3	7	40S ribosomal protein S7
RPS9	P46781	1	1	40S ribosomal protein S9
RPSA	P08865	1	1	40S ribosomal protein SA (37 kDa laminin receptor precursor) (37LRP) (37/67 kDa laminin receptor) (LRP/LR) (67 kDa laminin receptor) (67LR) (Colon carcinoma laminin-binding protein) (Laminin receptor 1) (LamR) (Laminin-binding protein precursor p40) (LBP/p40) (Multidrug resistance-associated protein MGr1-Ag) (NEM/1CHD4)
RPTOR	Q8N122	1	1	Regulatory-associated protein of mTOR (Raptor) (p150 target of rapamycin (TOR)-scaffold protein)
RRBP1	Q9P2E9	45	75	Ribosome-binding protein 1 (180 kDa ribosome receptor homolog) (RRp) (ES/130-related protein) (Ribosome receptor protein)
RREB1	Q92766	2	2	Ras-responsive element-binding protein 1 (RREB-1) (Finger protein in nuclear bodies) (Raf-responsive zinc finger protein LZ321) (Zinc finger motif enhancer-binding protein 1) (Zep-1)
RRM1	P23921	2	2	Ribonucleoside-diphosphate reductase large subunit (EC 1.17.4.1) (Ribonucleoside-diphosphate reductase subunit M1) (Ribonucleotide reductase large subunit)
RRM2	P31350	1	1	Ribonucleoside-diphosphate reductase subunit M2 (EC 1.17.4.1) (Ribonucleotide reductase small chain) (Ribonucleotide reductase small subunit)
RRN3	Q9NYV6	2	2	RNA polymerase I-specific transcription initiation factor RRN3 (Transcription initiation factor IA) (TIF-IA)
RRP12	Q5JTH9	2	2	RRP12-like protein
RSF1	Q96T23	1	1	Remodeling and spacing factor 1 (Rsf-1) (HBV pX-associated protein 8) (Hepatitis B virus X-associated protein) (p325 subunit of RSF chromatin-remodeling complex)
RSL1D1	O76021	7	9	Ribosomal L1 domain-containing protein 1 (CATX-11) (Cellular senescence-inhibited gene protein) (Protein PBK1)
RSRC2	Q7L4I2	1	1	Arginine/serine-rich coiled-coil protein 2
RTCB	Q9Y3I0	1	1	tRNA-splicing ligase RtcB homolog (EC 6.5.1.3)
RTFDC1	Q9BY42	2	2	Protein RTF2 homolog (Replication termination factor 2 domain-containing protein 1)
RTN3	O95197	1	2	Reticulon-3 (Homolog of ASY protein) (HAP) (Neuroendocrine-specific protein-like 2) (NSP-like protein 2) (Neuroendocrine-specific protein-like II) (NSP-like protein II) (NSPLII)
RTN4	Q9NQC3	1	2	Reticulon-4 (Foocen) (Neurite outgrowth inhibitor) (Nogo protein) (Neuroendocrine-specific protein) (NSP) (Neuroendocrine-specific protein C homolog) (RTN-x) (Reticulon-5)
RTTN	Q86VV8	1	1	Rotatin
RXRB	P28702	1	2	Retinoic acid receptor RXR-beta (Nuclear receptor subfamily 2 group B member 2) (Retinoid X receptor beta)
S100A10	P60903	2	3	Protein S100-A10 (Calpactin I light chain) (Calpactin-1 light chain) (Cellular ligand of annexin II) (S100 calcium-binding protein A10) (p10 protein) (p11)
S100P	P25815	1	1	Protein S100-P (Migration-inducing gene 9 protein) (MIG9) (Protein S100-E) (S100 calcium-binding protein P)
S100PBP	Q96BU1	1	1	S100P-binding protein (S100P-binding protein Riken)
SACM1L	Q9NTJ5	1	1	Phosphatidylinositide phosphatase SAC1 (EC 3.1.3.-) (Suppressor of actin mutations 1-like protein)
SAE1	Q9UBE0	5	6	SUMO-activating enzyme subunit 1 (Ubiquitin-like 1-activating enzyme E1A) [Cleaved into: SUMO-activating enzyme subunit 1, N-terminally processed]
SAFB	Q15424	2	2	Scaffold attachment factor B1 (SAF-B) (SAF-B1) (HSP27 estrogen response element-TATA box-binding protein) (HSP27 ERE-TATA-binding protein)
SAFB2	Q14151	1	1	Scaffold attachment factor B2 (SAF-B2)
SAP18	O00422	2	2	Histone deacetylase complex subunit SAP18 (18 kDa Sin3-associated polypeptide) (2HOR0202) (Cell growth-inhibiting gene 38 protein) (Sin3-associated polypeptide p18)
SAR1B	Q9Y6B6	2	2	GTP-binding protein SAR1b (GTP-binding protein B) (GTBPB)
SARS	P49591	1	2	Serine--tRNA ligase, cytoplasmic (EC 6.1.1.11) (Seryl-tRNA synthetase) (SerRS) (Seryl-tRNA(Ser/Sec) synthetase)
SART3	Q15020	3	3	Squamous cell carcinoma antigen recognized by T-cells 3 (SART-3) (hSART-3) (Tat-interacting protein of 110 kDa) (Tip110)
SBDS	Q9Y3A5	3	4	Ribosome maturation protein SBDS (Shwachman-Bodian-Diamond syndrome protein)
SC5D	O75845	2	2	Lathosterol oxidase (EC 1.14.21.6) (C-5 sterol desaturase) (Delta(7)-sterol 5-desaturase) (Lathosterol 5-desaturase) (Sterol-C5-desaturase)
SCAF11	Q99590	2	2	Protein SCAF11 (CTD-associated SR protein 11) (Renal carcinoma antigen NY-REN-40) (SC35-interacting protein 1) (SR-related and CTD-associated factor 11) (SRSF2-interacting protein) (Serine/arginine-rich splicing factor 2-interacting protein) (Splicing factor, arginine/serine-rich 2-interacting protein) (Splicing regulatory protein 129) (SRrp129)
SCAF4	O95104	1	1	Splicing factor, arginine/serine-rich 15 (CTD-binding SR-like protein RA4) (SR-related and CTD-associated factor 4)
SCARB1	Q8WTV0	1	1	Scavenger receptor class B member 1 (SRB1) (CD36 and LIMPII analogous 1) (CLA-1) (CD36 antigen-like 1) (Collagen type I receptor, thrombospondin receptor-like 1) (SR-BI) (CD antigen CD36)
SCCPDH	Q8NBX0	1	1	Saccharopine dehydrogenase-like oxidoreductase (EC 1.-.-.-)
SCD	O00767	3	5	Acyl-CoA desaturase (EC 1.14.19.1) (Delta(9)-desaturase) (Delta-9 desaturase) (Fatty acid desaturase) (Stearoyl-CoA desaturase)
SCFD1	Q8WVM8	1	1	Sec1 family domain-containing protein 1 (SLY1 homolog) (Sly1p) (Syntaxin-binding protein 1-like 2)
SCP2	P22307	3	3	Non-specific lipid-transfer protein (NSL-TP) (EC 2.3.1.176) (Propanoyl-CoA C-acyltransferase) (SCP-chi) (SCPX) (Sterol carrier protein 2) (SCP-2) (Sterol carrier protein X) (SCP-X)
SCYL1	Q96KG9	2	2	N-terminal kinase-like protein (Coated vesicle-associated kinase of 90 kDa) (SCY1-like protein 1) (Telomerase regulation-associated protein) (Telomerase transcriptional element-interacting factor) (Teratoma-associated tyrosine kinase)
SDHB	P21912	1	1	Succinate dehydrogenase [ubiquinone] iron-sulfur subunit, mitochondrial (EC 1.3.5.1) (Iron-sulfur subunit of complex II) (Ip)
SDHC	Q99643	1	2	Succinate dehydrogenase cytochrome b560 subunit, mitochondrial (Integral membrane protein CII-3) (QPs-1) (QPs1) (Succinate dehydrogenase complex subunit C) (Succinate-ubiquinone oxidoreductase cytochrome B large subunit) (CYBL)
SEC11C	Q9BY50	1	1	Signal peptidase complex catalytic subunit SEC11C (EC 3.4.21.89) (Microsomal signal peptidase 21 kDa subunit) (SPase 21 kDa subunit) (SEC11 homolog C) (SEC11-like protein 3) (SPC21)
SEC23A	Q15436	2	2	Protein transport protein Sec23A (SEC23-related protein A)
SEC23B	Q15437	1	2	Protein transport protein Sec23B (SEC23-related protein B)
SEC23IP	Q9Y6Y8	2	2	SEC23-interacting protein (p125)
SEC24C	P53992	2	3	Protein transport protein Sec24C (SEC24-related protein C)
SEC24D	O94855	2	3	Protein transport protein Sec24D (SEC24-related protein D)
SEC31A	O94979	4	6	Protein transport protein Sec31A (ABP125) (ABP130) (SEC31-like protein 1) (SEC31-related protein A) (Web1-like protein)
SEC61A1	P61619	2	2	Protein transport protein Sec61 subunit alpha isoform 1 (Sec61 alpha-1)
SEC62	Q99442	1	1	Translocation protein SEC62 (Translocation protein 1) (TP-1) (hTP-1)
SEC63	Q9UGP8	3	3	Translocation protein SEC63 homolog
SEPT7	Q16181	2	2	Septin-7 (CDC10 protein homolog)
SEPT8	Q92599	1	1	Septin-8
SEPT9	Q9UHD8	5	6	Septin-9 (MLL septin-like fusion protein MSF-A) (MLL septin-like fusion protein) (Ovarian/Breast septin) (Ov/Br septin) (Septin D1)
SERBP1	Q8NC51	1	1	Plasminogen activator inhibitor 1 RNA-binding protein (PAI1 RNA-binding protein 1) (PAI-RBP1) (SERPINE1 mRNA-binding protein 1)
SERF2	P84101	1	1	Small EDRK-rich factor 2 (Gastric cancer-related protein VRG107) (Protein 4F5-related) (4F5rel) (h4F5rel)
SERINC3	Q13530	1	2	Serine incorporator 3 (Tumor differentially expressed protein 1)
SERPINA1	P01009	4	6	Alpha-1-antitrypsin (Alpha-1 protease inhibitor) (Alpha-1-antiproteinase) (Serpin A1) [Cleaved into: Short peptide from AAT (SPAAT)]
SERPINB1	P30740	1	1	Leukocyte elastase inhibitor (LEI) (Monocyte/neutrophil elastase inhibitor) (EI) (M/NEI) (Peptidase inhibitor 2) (PI-2) (Serpin B1)
SERPIND1	P05546	1	1	Heparin cofactor 2 (Heparin cofactor II) (HC-II) (Protease inhibitor leuserpin-2) (HLS2) (Serpin D1)
SERPINE1	P05121	3	3	Plasminogen activator inhibitor 1 (PAI) (PAI-1) (Endothelial plasminogen activator inhibitor) (Serpin E1)
SERPINF2	P08697	1	1	Alpha-2-antiplasmin (Alpha-2-AP) (Alpha-2-plasmin inhibitor) (Alpha-2-PI) (Serpin F2)
SERPINH1	P50454	4	6	Serpin H1 (47 kDa heat shock protein) (Arsenic-transactivated protein 3) (AsTP3) (Cell proliferation-inducing gene 14 protein) (Collagen-binding protein) (Colligin) (Rheumatoid arthritis-related antigen RA-A47)
SESTD1	Q86VW0	1	1	SEC14 domain and spectrin repeat-containing protein 1 (Huntingtin-interacting protein-like protein) (Protein Solo)
SF1	Q15637	1	1	Splicing factor 1 (Mammalian branch point-binding protein) (BBP) (mBBP) (Transcription factor ZFM1) (Zinc finger gene in MEN1 locus) (Zinc finger protein 162)
SF3A1	Q15459	1	1	Splicing factor 3A subunit 1 (SF3a120) (Spliceosome-associated protein 114) (SAP 114)
SF3A2	Q15428	1	1	Splicing factor 3A subunit 2 (SF3a66) (Spliceosome-associated protein 62) (SAP 62)
SF3A3	Q12874	1	1	Splicing factor 3A subunit 3 (SF3a60) (Spliceosome-associated protein 61) (SAP 61)
SF3B1	O75533	5	6	Splicing factor 3B subunit 1 (Pre-mRNA-splicing factor SF3b 155 kDa subunit) (SF3b155) (Spliceosome-associated protein 155) (SAP 155)
SFN	P31947	1	1	14-3-3 protein sigma (Epithelial cell marker protein 1) (Stratifin)
SFPQ	P23246	3	4	Splicing factor, proline- and glutamine-rich (100 kDa DNA-pairing protein) (hPOMp100) (DNA-binding p52/p100 complex, 100 kDa subunit) (Polypyrimidine tract-binding protein-associated-splicing factor) (PSF) (PTB-associated-splicing factor)
SFSWAP	Q12872	1	1	Splicing factor, suppressor of white-apricot homolog (Splicing factor, arginine/serine-rich 8) (Suppressor of white apricot protein homolog)
SGPL1	O95470	1	2	Sphingosine-1-phosphate lyase 1 (S1PL) (SP-lyase 1) (SPL 1) (hSPL) (EC 4.1.2.27) (Sphingosine-1-phosphate aldolase)
SH3BP4	Q9P0V3	1	1	SH3 domain-binding protein 4 (EH-binding protein 10) (Transferrin receptor-trafficking protein)
SH3GL1	Q99961	1	1	Endophilin-A2 (EEN fusion partner of MLL) (Endophilin-2) (Extra eleven-nineteen leukemia fusion gene protein) (EEN) (SH3 domain protein 2B) (SH3 domain-containing GRB2-like protein 1)
SHMT2	P34897	3	3	Serine hydroxymethyltransferase, mitochondrial (SHMT) (EC 2.1.2.1) (Glycine hydroxymethyltransferase) (Serine methylase)
SIN3A	Q96ST3	1	2	Paired amphipathic helix protein Sin3a (Histone deacetylase complex subunit Sin3a) (Transcriptional corepressor Sin3a)
SIRT5	Q9NXA8	1	1	NAD-dependent protein deacylase sirtuin-5, mitochondrial (EC 3.5.1.-) (Regulatory protein SIR2 homolog 5) (SIR2-like protein 5)
SKIV2L2	P42285	1	1	Superkiller viralicidic activity 2-like 2 (EC 3.6.4.13) (ATP-dependent RNA helicase SKIV2L2) (TRAMP-like complex helicase)
SKP1	P63208	2	2	S-phase kinase-associated protein 1 (Cyclin-A/CDK2-associated protein p19) (Organ of Corti protein 2) (OCP-2) (Organ of Corti protein II) (OCP-II) (RNA polymerase II elongation factor-like protein) (SIII) (Transcription elongation factor B) (p19A) (p19skp1)
SLC12A4	Q9UP95	1	2	Solute carrier family 12 member 4 (Electroneutral potassium-chloride cotransporter 1) (Erythroid K-Cl cotransporter 1) (hKCC1)
SLC12A6	Q9UHW9	1	1	Solute carrier family 12 member 6 (Electroneutral potassium-chloride cotransporter 3) (K-Cl cotransporter 3)
SLC16A1	P53985	2	2	Monocarboxylate transporter 1 (MCT 1) (Solute carrier family 16 member 1)
SLC16A3	O15427	2	7	Monocarboxylate transporter 4 (MCT 4) (Solute carrier family 16 member 3)
SLC20A1	Q8WUM9	1	2	Sodium-dependent phosphate transporter 1 (Gibbon ape leukemia virus receptor 1) (GLVR-1) (Leukemia virus receptor 1 homolog) (Phosphate transporter 1) (PiT-1) (Solute carrier family 20 member 1)
SLC22A3	O75751	1	2	Solute carrier family 22 member 3 (Extraneuronal monoamine transporter) (EMT) (Organic cation transporter 3)
SLC25A1	P53007	2	3	Tricarboxylate transport protein, mitochondrial (Citrate transport protein) (CTP) (Solute carrier family 25 member 1) (Tricarboxylate carrier protein)
SLC25A10	Q9UBX3	1	1	Mitochondrial dicarboxylate carrier (Solute carrier family 25 member 10)
SLC25A3	Q00325	2	2	Phosphate carrier protein, mitochondrial (Phosphate transport protein) (PTP) (Solute carrier family 25 member 3)
SLC25A42	Q86VD7	1	2	Mitochondrial coenzyme A transporter SLC25A42 (Solute carrier family 25 member 42)
SLC25A5	P05141	2	3	ADP/ATP translocase 2 (ADP,ATP carrier protein 2) (ADP,ATP carrier protein, fibroblast isoform) (Adenine nucleotide translocator 2) (ANT 2) (Solute carrier family 25 member 5) [Cleaved into: ADP/ATP translocase 2, N-terminally processed]
SLC25A6	P12236	3	9	ADP/ATP translocase 3 (ADP,ATP carrier protein 3) (ADP,ATP carrier protein, isoform T2) (ANT 2) (Adenine nucleotide translocator 3) (ANT 3) (Solute carrier family 25 member 6)
SLC27A2	O14975	1	1	Very long-chain acyl-CoA synthetase (VLACS) (VLCS) (EC 6.2.1.-) (Fatty acid transport protein 2) (FATP-2) (Fatty-acid-coenzyme A ligase, very long-chain 1) (Long-chain-fatty-acid--CoA ligase) (EC 6.2.1.3) (Solute carrier family 27 member 2) (THCA-CoA ligase) (Very long-chain-fatty-acid-CoA ligase)
SLC29A1	Q99808	2	2	Equilibrative nucleoside transporter 1 (Equilibrative nitrobenzylmercaptopurine riboside-sensitive nucleoside transporter) (Equilibrative NBMPR-sensitive nucleoside transporter) (Nucleoside transporter, es-type) (Solute carrier family 29 member 1)
SLC2A3	P11169	1	2	Solute carrier family 2, facilitated glucose transporter member 3 (Glucose transporter type 3, brain) (GLUT-3)
SLC30A7	Q8NEW0	1	1	Zinc transporter 7 (ZnT-7) (Solute carrier family 30 member 7) (Znt-like transporter 2)
SLC35B2	Q8TB61	1	1	Adenosine 3'-phospho 5'-phosphosulfate transporter 1 (PAPS transporter 1) (Putative MAPK-activating protein PM15) (Putative NF-kappa-B-activating protein 48) (Solute carrier family 35 member B2)
SLC38A2	Q96QD8	2	4	Sodium-coupled neutral amino acid transporter 2 (Amino acid transporter A2) (Protein 40-9-1) (Solute carrier family 38 member 2) (System A amino acid transporter 2) (System A transporter 1) (System N amino acid transporter 2)
SLC39A14	Q15043	1	1	Zinc transporter ZIP14 (LIV-1 subfamily of ZIP zinc transporter 4) (LZT-Hs4) (Solute carrier family 39 member 14) (Zrt- and Irt-like protein 14) (ZIP-14)
SLC39A7	Q92504	1	1	Zinc transporter SLC39A7 (Histidine-rich membrane protein Ke4) (Really interesting new gene 5 protein) (Solute carrier family 39 member 7) (Zrt-, Irt-like protein 7) (ZIP7)
SLC3A2	P08195	2	3	4F2 cell-surface antigen heavy chain (4F2hc) (4F2 heavy chain antigen) (Lymphocyte activation antigen 4F2 large subunit) (Solute carrier family 3 member 2) (CD antigen CD98)
SLC43A2	Q8N370	2	3	Large neutral amino acids transporter small subunit 4 (L-type amino acid transporter 4) (Solute carrier family 43 member 2)
SLC6A8	P48029	1	1	Sodium- and chloride-dependent creatine transporter 1 (CT1) (Creatine transporter 1) (Solute carrier family 6 member 8)
SLC7A5	Q01650	1	1	Large neutral amino acids transporter small subunit 1 (4F2 light chain) (4F2 LC) (4F2LC) (CD98 light chain) (Integral membrane protein E16) (L-type amino acid transporter 1) (hLAT1) (Solute carrier family 7 member 5) (y+ system cationic amino acid transporter)
SLCO1B7	G3V203	1	2	Putative solute carrier organic anion transporter family member 1B7 (Liver-specific organic anion transporter 3) (LST-3)
SLTM	Q9NWH9	2	2	SAFB-like transcription modulator (Modulator of estrogen-induced transcription)
SLU7	O95391	1	1	Pre-mRNA-splicing factor SLU7 (hSlu7)
SMARCA1	P28370	6	6	Probable global transcription activator SNF2L1 (EC 3.6.4.-) (ATP-dependent helicase SMARCA1) (Nucleosome-remodeling factor subunit SNF2L) (SWI/SNF-related matrix-associated actin-dependent regulator of chromatin subfamily A member 1)
SMARCA4	P51532	1	1	Transcription activator BRG1 (EC 3.6.4.-) (ATP-dependent helicase SMARCA4) (BRG1-associated factor 190A) (BAF190A) (Mitotic growth and transcription activator) (Protein BRG-1) (Protein brahma homolog 1) (SNF2-beta) (SWI/SNF-related matrix-associated actin-dependent regulator of chromatin subfamily A member 4)
SMARCA5	O60264	2	2	SWI/SNF-related matrix-associated actin-dependent regulator of chromatin subfamily A member 5 (SWI/SNF-related matrix-associated actin-dependent regulator of chromatin A5) (EC 3.6.4.-) (Sucrose nonfermenting protein 2 homolog) (hSNF2H)
SMARCC1	Q92922	4	5	SWI/SNF complex subunit SMARCC1 (BRG1-associated factor 155) (BAF155) (SWI/SNF complex 155 kDa subunit) (SWI/SNF-related matrix-associated actin-dependent regulator of chromatin subfamily C member 1)
SMARCC2	Q8TAQ2	1	1	SWI/SNF complex subunit SMARCC2 (BRG1-associated factor 170) (BAF170) (SWI/SNF complex 170 kDa subunit) (SWI/SNF-related matrix-associated actin-dependent regulator of chromatin subfamily C member 2)
SMARCD2	Q92925	1	1	SWI/SNF-related matrix-associated actin-dependent regulator of chromatin subfamily D member 2 (60 kDa BRG-1/Brm-associated factor subunit B) (BRG1-associated factor 60B) (BAF60B)
SMC2	O95347	2	2	Structural maintenance of chromosomes protein 2 (SMC protein 2) (SMC-2) (Chromosome-associated protein E) (hCAP-E) (XCAP-E homolog)
SMC4	Q9NTJ3	1	1	Structural maintenance of chromosomes protein 4 (SMC protein 4) (SMC-4) (Chromosome-associated polypeptide C) (hCAP-C) (XCAP-C homolog)
SMCHD1	A6NHR9	1	1	Structural maintenance of chromosomes flexible hinge domain-containing protein 1 (SMC hinge domain-containing protein 1)
SMNDC1	O75940	1	1	Survival of motor neuron-related-splicing factor 30 (30 kDa splicing factor SMNrp) (SMN-related protein) (Survival motor neuron domain-containing protein 1)
SMU1	Q2TAY7	1	1	WD40 repeat-containing protein SMU1 (Smu-1 suppressor of mec-8 and unc-52 protein homolog) [Cleaved into: WD40 repeat-containing protein SMU1, N-terminally processed]
SND1	Q7KZF4	1	1	Staphylococcal nuclease domain-containing protein 1 (100 kDa coactivator) (EBNA2 coactivator p100) (Tudor domain-containing protein 11) (p100 co-activator)
SNRNP200	O75643	5	7	U5 small nuclear ribonucleoprotein 200 kDa helicase (EC 3.6.4.13) (Activating signal cointegrator 1 complex subunit 3-like 1) (BRR2 homolog) (U5 snRNP-specific 200 kDa protein) (U5-200KD)
SNRNP48	Q6IEG0	1	1	U11/U12 small nuclear ribonucleoprotein 48 kDa protein (U11/U12 snRNP 48 kDa protein) (U11/U12-48K)
SNRPB2	P08579	1	1	U2 small nuclear ribonucleoprotein B'' (U2 snRNP B'')
SNRPD2	P62316	1	1	Small nuclear ribonucleoprotein Sm D2 (Sm-D2) (snRNP core protein D2)
SON	P18583	1	1	Protein SON (Bax antagonist selected in saccharomyces 1) (BASS1) (Negative regulatory element-binding protein) (NRE-binding protein) (Protein DBP-5) (SON3)
SORBS3	O60504	1	2	Vinexin (SH3-containing adapter molecule 1) (SCAM-1) (Sorbin and SH3 domain-containing protein 3)
SP100	P23497	1	1	Nuclear autoantigen Sp-100 (Nuclear dot-associated Sp100 protein) (Speckled 100 kDa)
SPATS2L	Q9NUQ6	4	4	SPATS2-like protein (DNA polymerase-transactivated protein 6) (Stress granule and nucleolar protein) (SGNP)
SPEN	Q96T58	1	2	Msx2-interacting protein (SMART/HDAC1-associated repressor protein) (SPEN homolog)
SPG20	Q8N0X7	1	1	Spartin (Spastic paraplegia 20 protein) (Trans-activated by hepatitis C virus core protein 1)
SPPL2A	Q8TCT8	1	1	Signal peptide peptidase-like 2A (SPP-like 2A) (SPPL2a) (EC 3.4.23.-) (Intramembrane protease 3) (IMP-3) (Presenilin-like protein 2)
SPTBN1	Q01082	11	15	Spectrin beta chain, non-erythrocytic 1 (Beta-II spectrin) (Fodrin beta chain) (Spectrin, non-erythroid beta chain 1)
SPTBN2	O15020	1	1	Spectrin beta chain, non-erythrocytic 2 (Beta-III spectrin) (Spinocerebellar ataxia 5 protein)
SPTBN4	Q9H254	2	2	Spectrin beta chain, non-erythrocytic 4 (Beta-IV spectrin) (Spectrin, non-erythroid beta chain 3)
SPTLC1	O15269	2	3	Serine palmitoyltransferase 1 (EC 2.3.1.50) (Long chain base biosynthesis protein 1) (LCB 1) (Serine-palmitoyl-CoA transferase 1) (SPT 1) (SPT1)
SQLE	Q14534	2	2	Squalene monooxygenase (EC 1.14.13.132) (Squalene epoxidase) (SE)
SQRDL	Q9Y6N5	1	1	Sulfide:quinone oxidoreductase, mitochondrial (EC 1.-.-.-)
SQSTM1	Q13501	1	1	Sequestosome-1 (EBI3-associated protein of 60 kDa) (EBIAP) (p60) (Phosphotyrosine-independent ligand for the Lck SH2 domain of 62 kDa) (Ubiquitin-binding protein p62)
SRP14	P37108	2	4	Signal recognition particle 14 kDa protein (SRP14) (18 kDa Alu RNA-binding protein)
SRP54	P61011	4	4	Signal recognition particle 54 kDa protein (SRP54)
SRP72	O76094	2	4	Signal recognition particle subunit SRP72 (SRP72) (Signal recognition particle 72 kDa protein)
SRP9	P49458	2	2	Signal recognition particle 9 kDa protein (SRP9)
SRPR	P08240	1	1	Signal recognition particle receptor subunit alpha (SR-alpha) (Docking protein alpha) (DP-alpha)
SRRT	Q9BXP5	2	3	Serrate RNA effector molecule homolog (Arsenite-resistance protein 2)
SRSF1	Q07955	1	1	Serine/arginine-rich splicing factor 1 (Alternative-splicing factor 1) (ASF-1) (Splicing factor, arginine/serine-rich 1) (pre-mRNA-splicing factor SF2, P33 subunit)
SRSF3	P84103	1	1	Serine/arginine-rich splicing factor 3 (Pre-mRNA-splicing factor SRP20) (Splicing factor, arginine/serine-rich 3)
SRSF7	Q16629	1	1	Serine/arginine-rich splicing factor 7 (Splicing factor 9G8) (Splicing factor, arginine/serine-rich 7)
SSB	P05455	1	1	Lupus La protein (La autoantigen) (La ribonucleoprotein) (Sjoegren syndrome type B antigen) (SS-B)
SSR1	P43307	2	2	Translocon-associated protein subunit alpha (TRAP-alpha) (Signal sequence receptor subunit alpha) (SSR-alpha)
SSR3	Q9UNL2	2	2	Translocon-associated protein subunit gamma (TRAP-gamma) (Signal sequence receptor subunit gamma) (SSR-gamma)
SSRP1	Q08945	3	3	FACT complex subunit SSRP1 (Chromatin-specific transcription elongation factor 80 kDa subunit) (Facilitates chromatin transcription complex 80 kDa subunit) (FACT 80 kDa subunit) (FACTp80) (Facilitates chromatin transcription complex subunit SSRP1) (Recombination signal sequence recognition protein 1) (Structure-specific recognition protein 1) (hSSRP1) (T160)
ST13	P50502	1	1	Hsc70-interacting protein (Hip) (Aging-associated protein 2) (Progesterone receptor-associated p48 protein) (Protein FAM10A1) (Putative tumor suppressor ST13) (Renal carcinoma antigen NY-REN-33) (Suppression of tumorigenicity 13 protein)
ST6GAL1	P15907	2	2	Beta-galactoside alpha-2,6-sialyltransferase 1 (Alpha 2,6-ST 1) (EC 2.4.99.1) (B-cell antigen CD75) (CMP-N-acetylneuraminate-beta-galactosamide-alpha-2,6-sialyltransferase 1) (ST6Gal I) (ST6GalI) (Sialyltransferase 1)
STARD7	Q9NQZ5	1	1	StAR-related lipid transfer protein 7, mitochondrial (Gestational trophoblastic tumor protein 1) (START domain-containing protein 7) (StARD7)
STAT3	P40763	1	1	Signal transducer and activator of transcription 3 (Acute-phase response factor)
STAT6	P42226	1	1	Signal transducer and activator of transcription 6 (IL-4 Stat)
STAU1	O95793	3	5	Double-stranded RNA-binding protein Staufen homolog 1
STIM1	Q13586	3	3	Stromal interaction molecule 1
STMN2	Q93045	1	3	Stathmin-2 (Superior cervical ganglion-10 protein) (Protein SCG10)
STRAP	Q9Y3F4	1	2	Serine-threonine kinase receptor-associated protein (MAP activator with WD repeats) (UNR-interacting protein) (WD-40 repeat protein PT-WD)
STRIP1	Q5VSL9	1	1	Striatin-interacting protein 1 (Protein FAM40A)
STX18	Q9P2W9	1	2	Syntaxin-18 (Cell growth-inhibiting gene 9 protein)
STXBP3	O00186	1	1	Syntaxin-binding protein 3 (Platelet Sec1 protein) (PSP) (Protein unc-18 homolog 3) (Unc18-3) (Protein unc-18 homolog C) (Unc-18C)
SUCLG1	P53597	1	3	Succinyl-CoA ligase [ADP/GDP-forming] subunit alpha, mitochondrial (EC 6.2.1.4) (EC 6.2.1.5) (Succinyl-CoA synthetase subunit alpha) (SCS-alpha)
SULT1A1	P50225	1	3	Sulfotransferase 1A1 (ST1A1) (EC 2.8.2.1) (Aryl sulfotransferase 1) (HAST1/HAST2) (Phenol sulfotransferase 1) (Phenol-sulfating phenol sulfotransferase 1) (P-PST 1) (ST1A3) (Thermostable phenol sulfotransferase) (Ts-PST)
SULT1A3	P50224	4	5	Sulfotransferase 1A3/1A4 (ST1A3/ST1A4) (EC 2.8.2.1) (Aryl sulfotransferase 1A3/1A4) (Catecholamine-sulfating phenol sulfotransferase) (HAST3) (M-PST) (Monoamine-sulfating phenol sulfotransferase) (Placental estrogen sulfotransferase) (Sulfotransferase, monoamine-preferring) (Thermolabile phenol sulfotransferase) (TL-PST)
SULT2A1	Q06520	2	2	Bile salt sulfotransferase (EC 2.8.2.14) (Dehydroepiandrosterone sulfotransferase) (DHEA-ST) (Hydroxysteroid Sulfotransferase) (HST) (ST2) (ST2A3) (Sulfotransferase 2A1) (ST2A1)
SUMO3	P55854	1	1	Small ubiquitin-related modifier 3 (SUMO-3) (SMT3 homolog 1) (SUMO-2) (Ubiquitin-like protein SMT3B) (Smt3B)
SUN2	Q9UH99	1	1	SUN domain-containing protein 2 (Protein unc-84 homolog B) (Rab5-interacting protein) (Rab5IP) (Sad1/unc-84 protein-like 2)
SUPT16H	Q9Y5B9	3	3	FACT complex subunit SPT16 (Chromatin-specific transcription elongation factor 140 kDa subunit) (FACT 140 kDa subunit) (FACTp140) (Facilitates chromatin transcription complex subunit SPT16) (hSPT16)
SUPT6H	Q7KZ85	2	3	Transcription elongation factor SPT6 (hSPT6) (Histone chaperone suppressor of Ty6) (Tat-cotransactivator 2 protein) (Tat-CT2 protein)
SUPV3L1	Q8IYB8	2	2	ATP-dependent RNA helicase SUPV3L1, mitochondrial (EC 3.6.4.13) (Suppressor of var1 3-like protein 1) (SUV3-like protein 1)
SYMPK	Q92797	2	2	Symplekin
SYNCRIP	O60506	1	1	Heterogeneous nuclear ribonucleoprotein Q (hnRNP Q) (Glycine- and tyrosine-rich RNA-binding protein) (GRY-RBP) (NS1-associated protein 1) (Synaptotagmin-binding, cytoplasmic RNA-interacting protein)
TAF15	Q92804	3	5	TATA-binding protein-associated factor 2N (68 kDa TATA-binding protein-associated factor) (TAF(II)68) (TAFII68) (RNA-binding protein 56)
TAGLN	Q01995	1	1	Transgelin (22 kDa actin-binding protein) (Protein WS3-10) (Smooth muscle protein 22-alpha) (SM22-alpha)
TALDO1	P37837	3	3	Transaldolase (EC 2.2.1.2)
TARDBP	Q13148	1	1	TAR DNA-binding protein 43 (TDP-43)
TARS	P26639	2	3	Threonine--tRNA ligase, cytoplasmic (EC 6.1.1.3) (Threonyl-tRNA synthetase) (ThrRS)
TBCA	O75347	1	1	Tubulin-specific chaperone A (TCP1-chaperonin cofactor A) (Tubulin-folding cofactor A) (CFA)
TBL2	Q9Y4P3	1	1	Transducin beta-like protein 2 (WS beta-transducin repeats protein) (WS-betaTRP) (Williams-Beuren syndrome chromosomal region 13 protein)
TBX3	O15119	1	1	T-box transcription factor TBX3 (T-box protein 3)
TCEA1	P23193	1	1	Transcription elongation factor A protein 1 (Transcription elongation factor S-II protein 1) (Transcription elongation factor TFIIS.o)
TCEA3	O75764	2	2	Transcription elongation factor A protein 3 (Transcription elongation factor S-II protein 3) (Transcription elongation factor TFIIS.h)
TCOF1	Q13428	3	3	Treacle protein (Treacher Collins syndrome protein)
TCP1	P17987	1	1	T-complex protein 1 subunit alpha (TCP-1-alpha) (CCT-alpha)
TECR	Q9NZ01	3	7	Very-long-chain enoyl-CoA reductase (EC 1.3.1.93) (Synaptic glycoprotein SC2) (Trans-2,3-enoyl-CoA reductase) (TER)
TELO2	Q9Y4R8	1	2	Telomere length regulation protein TEL2 homolog (Protein clk-2 homolog) (hCLK2)
TERF2	Q15554	1	1	Telomeric repeat-binding factor 2 (TTAGGG repeat-binding factor 2) (Telomeric DNA-binding protein)
TES	Q9UGI8	2	2	Testin (TESS)
TF	P02787	11	12	Serotransferrin (Transferrin) (Beta-1 metal-binding globulin) (Siderophilin)
TFAM	Q00059	3	4	Transcription factor A, mitochondrial (mtTFA) (Mitochondrial transcription factor 1) (MtTF1) (Transcription factor 6) (TCF-6) (Transcription factor 6-like 2)
TFB2M	Q9H5Q4	1	1	Dimethyladenosine transferase 2, mitochondrial (EC 2.1.1.-) (Hepatitis C virus NS5A-transactivated protein 5) (HCV NS5A-transactivated protein 5) (Mitochondrial 12S rRNA dimethylase 2) (Mitochondrial transcription factor B2) (h-mtTFB) (h-mtTFB2) (hTFB2M) (mtTFB2) (S-adenosylmethionine-6-N', N'-adenosyl(rRNA) dimethyltransferase 2)
TFPI	P10646	3	4	Tissue factor pathway inhibitor (TFPI) (Extrinsic pathway inhibitor) (EPI) (Lipoprotein-associated coagulation inhibitor) (LACI)
TFRC	P02786	7	9	Transferrin receptor protein 1 (TR) (TfR) (TfR1) (Trfr) (T9) (p90) (CD antigen CD71) [Cleaved into: Transferrin receptor protein 1, serum form (sTfR)]
TGFBR3L	H7BXC5	1	1	Transforming growth factor-beta receptor type 3-like protein (TGF-beta receptor type-3-like protein) (TGFR-3L) (Transforming growth factor-beta receptor type III-like protein) (TGF-beta receptor type III-like protein)
THAP11	Q96EK4	1	1	THAP domain-containing protein 11
THOC2	Q8NI27	2	2	THO complex subunit 2 (Tho2) (hTREX120)
THOC5	Q13769	1	1	THO complex subunit 5 homolog (Functional spliceosome-associated protein 79) (fSAP79) (NF2/meningioma region protein pK1.3) (Placental protein 39.2) (PP39.2) (hTREX90)
THRAP3	Q9Y2W1	3	4	Thyroid hormone receptor-associated protein 3 (Thyroid hormone receptor-associated protein complex 150 kDa component) (Trap150)
THUMPD1	Q9NXG2	1	1	THUMP domain-containing protein 1
THYN1	Q9P016	1	1	Thymocyte nuclear protein 1 (Thymocyte protein Thy28)
TIAL1	Q01085	1	2	Nucleolysin TIAR (TIA-1-related protein)
TIMELESS	Q9UNS1	2	2	Protein timeless homolog (hTIM)
TIMM44	O43615	1	1	Mitochondrial import inner membrane translocase subunit TIM44
TKT	P29401	1	2	Transketolase (TK) (EC 2.2.1.1)
TLE4	Q04727	1	2	Transducin-like enhancer protein 4
TLN1	Q9Y490	3	4	Talin-1
TLN2	Q9Y4G6	1	1	Talin-2
TM7SF2	O76062	1	1	Delta(14)-sterol reductase (Delta-14-SR) (EC 1.3.1.70) (Another new gene 1 protein) (C-14 sterol reductase) (Putative sterol reductase SR-1) (Sterol C14-reductase) (Transmembrane 7 superfamily member 2)
TM9SF3	Q9HD45	1	2	Transmembrane 9 superfamily member 3 (EP70-P-iso) (SM-11044-binding protein)
TM9SF4	Q92544	2	2	Transmembrane 9 superfamily member 4
TMA7	Q9Y2S6	1	2	Translation machinery-associated protein 7 (Coiled-coil domain-containing protein 72)
TMCO1	Q9UM00	1	1	Transmembrane and coiled-coil domain-containing protein 1 (Transmembrane and coiled-coil domains protein 4) (Xenogeneic cross-immune protein PCIA3)
TMED10	P49755	1	3	Transmembrane emp24 domain-containing protein 10 (21 kDa transmembrane-trafficking protein) (S31III125) (S31I125) (Tmp-21-I) (Transmembrane protein Tmp21) (p23) (p24 family protein delta-1) (p24delta1) (p24delta)
TMED2	Q15363	1	2	Transmembrane emp24 domain-containing protein 2 (Membrane protein p24A) (p24) (p24 family protein beta-1) (p24beta1)
TMEM178B	H3BSE1	1	1	Transmembrane protein 178B
TMEM2	Q9UHN6	1	1	Transmembrane protein 2
TMEM209	Q96SK2	1	2	Transmembrane protein 209
TMEM214	Q6NUQ4	3	4	Transmembrane protein 214
TMEM33	P57088	1	1	Transmembrane protein 33 (Protein DB83)
TMSB10	P63313	1	1	Thymosin beta-10
TMX2	Q9Y320	1	3	Thioredoxin-related transmembrane protein 2 (Cell proliferation-inducing gene 26 protein) (Thioredoxin domain-containing protein 14)
TOMM40	O96008	1	1	Mitochondrial import receptor subunit TOM40 homolog (Protein Haymaker) (Translocase of outer membrane 40 kDa subunit homolog) (p38.5)
TOMM70A	O94826	3	3	Mitochondrial import receptor subunit TOM70 (Mitochondrial precursor proteins import receptor) (Translocase of outer membrane 70 kDa subunit)
TOP1	P11387	3	4	DNA topoisomerase 1 (EC 5.99.1.2) (DNA topoisomerase I)
TOP2A	P11388	6	8	DNA topoisomerase 2-alpha (EC 5.99.1.3) (DNA topoisomerase II, alpha isozyme)
TOP2B	Q02880	3	4	DNA topoisomerase 2-beta (EC 5.99.1.3) (DNA topoisomerase II, beta isozyme)
TOPBP1	Q92547	1	1	DNA topoisomerase 2-binding protein 1 (DNA topoisomerase II-beta-binding protein 1) (TopBP1) (DNA topoisomerase II-binding protein 1)
TPI1	P60174	5	8	Triosephosphate isomerase (TIM) (EC 5.3.1.1) (Triose-phosphate isomerase)
TPP2	P29144	1	1	Tripeptidyl-peptidase 2 (TPP-2) (EC 3.4.14.10) (Tripeptidyl aminopeptidase) (Tripeptidyl-peptidase II) (TPP-II)
TPRG1L	Q5T0D9	1	1	Tumor protein p63-regulated gene 1-like protein (Mossy fiber terminal-associated vertebrate-specific presynaptic protein) (Protein FAM79A)
TPT1	P13693	1	2	Translationally-controlled tumor protein (TCTP) (Fortilin) (Histamine-releasing factor) (HRF) (p23)
TPX2	Q9ULW0	6	7	Targeting protein for Xklp2 (Differentially expressed in cancerous and non-cancerous lung cells 2) (DIL-2) (Hepatocellular carcinoma-associated antigen 519) (Protein fls353) (Restricted expression proliferation-associated protein 100) (p100)
TRAM1	Q15629	1	1	Translocating chain-associated membrane protein 1
TRAP1	Q12931	2	2	Heat shock protein 75 kDa, mitochondrial (HSP 75) (TNFR-associated protein 1) (Tumor necrosis factor type 1 receptor-associated protein) (TRAP-1)
TRIAP1	O43715	1	1	TP53-regulated inhibitor of apoptosis 1 (Protein 15E1.1) (WF-1) (p53-inducible cell-survival factor) (p53CSV)
TRIM24	O15164	1	1	Transcription intermediary factor 1-alpha (TIF1-alpha) (EC 6.3.2.-) (E3 ubiquitin-protein ligase TRIM24) (RING finger protein 82) (Tripartite motif-containing protein 24)
TRIM25	Q14258	3	4	E3 ubiquitin/ISG15 ligase TRIM25 (EC 6.3.2.19) (EC 6.3.2.n3) (Estrogen-responsive finger protein) (RING finger protein 147) (Tripartite motif-containing protein 25) (Ubiquitin/ISG15-conjugating enzyme TRIM25) (Zinc finger protein 147)
TRIM33	Q9UPN9	1	1	E3 ubiquitin-protein ligase TRIM33 (EC 6.3.2.-) (Ectodermin homolog) (RET-fused gene 7 protein) (Protein Rfg7) (Transcription intermediary factor 1-gamma) (TIF1-gamma) (Tripartite motif-containing protein 33)
TRIP12	Q14669	1	1	E3 ubiquitin-protein ligase TRIP12 (EC 6.3.2.-) (E3 ubiquitin-protein ligase for Arf) (ULF) (Thyroid receptor-interacting protein 12) (TR-interacting protein 12) (TRIP-12)
TROVE2	P10155	1	1	60 kDa SS-A/Ro ribonucleoprotein (60 kDa Ro protein) (60 kDa ribonucleoprotein Ro) (RoRNP) (Ro 60 kDa autoantigen) (Sjoegren syndrome antigen A2) (Sjoegren syndrome type A antigen) (SS-A) (TROVE domain family member 2)
TSFM	P43897	2	2	Elongation factor Ts, mitochondrial (EF-Ts) (EF-TsMt)
TSTD2	Q5T7W7	1	1	Thiosulfate sulfurtransferase/rhodanese-like domain-containing protein 2 (Rhodanese domain-containing protein 2)
TTC1	Q99614	1	1	Tetratricopeptide repeat protein 1 (TPR repeat protein 1)
TTC21B	Q7Z4L5	1	1	Tetratricopeptide repeat protein 21B (TPR repeat protein 21B)
TTC37	Q6PGP7	2	2	Tetratricopeptide repeat protein 37 (TPR repeat protein 37) (SKI3 homolog) (Ski3) (Tricho-hepatic-enteric syndrome protein) (Thespin)
TTC39C	Q8N584	1	1	Tetratricopeptide repeat protein 39C (TPR repeat protein 39C)
TTF2	Q9UNY4	1	1	Transcription termination factor 2 (EC 3.6.4.-) (Lodestar homolog) (RNA polymerase II termination factor) (Transcription release factor 2) (F2) (HuF2)
TTK	P33981	1	1	Dual specificity protein kinase TTK (EC 2.7.12.1) (Phosphotyrosine picked threonine-protein kinase) (PYT)
TTLL5	Q6EMB2	1	1	Tubulin polyglutamylase TTLL5 (EC 6.-.-.-) (SRC1 and TIF2-associated modulatory protein) (Tubulin--tyrosine ligase-like protein 5)
TTN	Q8WZ42	2	2	Titin
TUBA1B	P68363	2	3	Tubulin alpha-1B chain (Alpha-tubulin ubiquitous) (Tubulin K-alpha-1) (Tubulin alpha-ubiquitous chain)
TUBB2A	Q13885	1	3	Tubulin beta-2A chain (Tubulin beta class IIa)
TUBB3	Q13509	1	2	Tubulin beta-3 chain (Tubulin beta-4 chain) (Tubulin beta-III)
TUBGCP2	Q9BSJ2	1	1	Gamma-tubulin complex component 2 (GCP-2) (hGCP2) (Gamma-ring complex protein 103 kDa) (h103p) (hGrip103) (Spindle pole body protein Spc97 homolog) (hSpc97)
TUFM	P49411	1	1	Elongation factor Tu, mitochondrial (EF-Tu) (P43)
TWF2	Q6IBS0	1	1	Twinfilin-2 (A6-related protein) (hA6RP) (Protein tyrosine kinase 9-like) (Twinfilin-1-like protein)
TXLNA	P40222	2	2	Alpha-taxilin
TXN	P10599	1	1	Thioredoxin (Trx) (ATL-derived factor) (ADF) (Surface-associated sulphydryl protein) (SASP)
TXNDC9	O14530	1	1	Thioredoxin domain-containing protein 9 (ATP-binding protein associated with cell differentiation) (Protein 1-4)
TXNIP	Q9H3M7	1	1	Thioredoxin-interacting protein (Thioredoxin-binding protein 2) (Vitamin D3 up-regulated protein 1)
TYMS	P04818	1	1	Thymidylate synthase (TS) (TSase) (EC 2.1.1.45)
U2AF2	P26368	2	2	Splicing factor U2AF 65 kDa subunit (U2 auxiliary factor 65 kDa subunit) (hU2AF(65)) (hU2AF65) (U2 snRNP auxiliary factor large subunit)
U2SURP	O15042	1	1	U2 snRNP-associated SURP motif-containing protein (140 kDa Ser/Arg-rich domain protein) (U2-associated protein SR140)
UAP1	Q16222	1	1	UDP-N-acetylhexosamine pyrophosphorylase (Antigen X) (AGX) (Sperm-associated antigen 2) [Includes: UDP-N-acetylgalactosamine pyrophosphorylase (EC 2.7.7.83) (AGX-1); UDP-N-acetylglucosamine pyrophosphorylase (EC 2.7.7.23) (AGX-2)]
UBA1	P22314	4	4	Ubiquitin-like modifier-activating enzyme 1 (Protein A1S9) (Ubiquitin-activating enzyme E1)
UBA2	Q9UBT2	2	4	SUMO-activating enzyme subunit 2 (EC 6.3.2.-) (Anthracycline-associated resistance ARX) (Ubiquitin-like 1-activating enzyme E1B) (Ubiquitin-like modifier-activating enzyme 2)
UBAP2L	Q14157	2	2	Ubiquitin-associated protein 2-like (Protein NICE-4)
UBC	P0CG48	3	4	Polyubiquitin-C [Cleaved into: Ubiquitin]
UBE2D1	P51668	1	1	Ubiquitin-conjugating enzyme E2 D1 (EC 6.3.2.19) (Stimulator of Fe transport) (SFT) (UBC4/5 homolog) (UbcH5) (Ubiquitin carrier protein D1) (Ubiquitin-conjugating enzyme E2(17)KB 1) (Ubiquitin-conjugating enzyme E2-17 kDa 1) (Ubiquitin-protein ligase D1)
UBE2I	P63279	1	1	SUMO-conjugating enzyme UBC9 (EC 6.3.2.-) (SUMO-protein ligase) (Ubiquitin carrier protein 9) (Ubiquitin carrier protein I) (Ubiquitin-conjugating enzyme E2 I) (Ubiquitin-protein ligase I) (p18)
UBE2M	P61081	1	1	NEDD8-conjugating enzyme Ubc12 (EC 6.3.2.-) (NEDD8 carrier protein) (NEDD8 protein ligase) (Ubiquitin-conjugating enzyme E2 M)
UBE2T	Q9NPD8	1	2	Ubiquitin-conjugating enzyme E2 T (EC 6.3.2.19) (Cell proliferation-inducing gene 50 protein) (Ubiquitin carrier protein T) (Ubiquitin-protein ligase T)
UBL5	Q9BZL1	1	2	Ubiquitin-like protein 5
UBR2	Q8IWV8	1	1	E3 ubiquitin-protein ligase UBR2 (EC 6.3.2.-) (N-recognin-2) (Ubiquitin-protein ligase E3-alpha-2) (Ubiquitin-protein ligase E3-alpha-II)
UBR4	Q5T4S7	9	12	E3 ubiquitin-protein ligase UBR4 (EC 6.3.2.-) (600 kDa retinoblastoma protein-associated factor) (N-recognin-4) (Retinoblastoma-associated factor of 600 kDa) (RBAF600) (p600) (Zinc finger UBR1-type protein 1)
UBR5	O95071	1	1	E3 ubiquitin-protein ligase UBR5 (EC 6.3.2.-) (E3 ubiquitin-protein ligase, HECT domain-containing 1) (Hyperplastic discs protein homolog) (hHYD) (Progestin-induced protein)
UBXN4	Q92575	2	2	UBX domain-containing protein 4 (Erasin) (UBX domain-containing protein 2)
UGDH	O60701	4	5	UDP-glucose 6-dehydrogenase (UDP-Glc dehydrogenase) (UDP-GlcDH) (UDPGDH) (EC 1.1.1.22)
UGGT1	Q9NYU2	3	4	UDP-glucose:glycoprotein glucosyltransferase 1 (UGT1) (hUGT1) (EC 2.4.1.-) (UDP--Glc:glycoprotein glucosyltransferase) (UDP-glucose ceramide glucosyltransferase-like 1)
UGGT2	Q9NYU1	1	1	UDP-glucose:glycoprotein glucosyltransferase 2 (UGT2) (hUGT2) (EC 2.4.1.-) (UDP--Glc:glycoprotein glucosyltransferase 2) (UDP-glucose ceramide glucosyltransferase-like 1)
UGP2	Q16851	1	1	UTP--glucose-1-phosphate uridylyltransferase (EC 2.7.7.9) (UDP-glucose pyrophosphorylase) (UDPGP) (UGPase)
UGT2B15	P54855	1	1	UDP-glucuronosyltransferase 2B15 (UDPGT 2B15) (EC 2.4.1.17) (HLUG4) (UDP-glucuronosyltransferase 2B8) (UDPGT 2B8) (UDPGTh-3)
UPF1	Q92900	3	3	Regulator of nonsense transcripts 1 (EC 3.6.4.-) (ATP-dependent helicase RENT1) (Nonsense mRNA reducing factor 1) (NORF1) (Up-frameshift suppressor 1 homolog) (hUpf1)
USO1	O60763	3	4	General vesicular transport factor p115 (Protein USO1 homolog) (Transcytosis-associated protein) (TAP) (Vesicle-docking protein)
USP14	P54578	4	5	Ubiquitin carboxyl-terminal hydrolase 14 (EC 3.4.19.12) (Deubiquitinating enzyme 14) (Ubiquitin thioesterase 14) (Ubiquitin-specific-processing protease 14)
USP24	Q9UPU5	1	1	Ubiquitin carboxyl-terminal hydrolase 24 (EC 3.4.19.12) (Deubiquitinating enzyme 24) (Ubiquitin thioesterase 24) (Ubiquitin-specific-processing protease 24)
USP25	Q9UHP3	1	1	Ubiquitin carboxyl-terminal hydrolase 25 (EC 3.4.19.12) (Deubiquitinating enzyme 25) (USP on chromosome 21) (Ubiquitin thioesterase 25) (Ubiquitin-specific-processing protease 25)
USP3	Q9Y6I4	1	1	Ubiquitin carboxyl-terminal hydrolase 3 (EC 3.4.19.12) (Deubiquitinating enzyme 3) (Ubiquitin thioesterase 3) (Ubiquitin-specific-processing protease 3)
USP34	Q70CQ2	1	1	Ubiquitin carboxyl-terminal hydrolase 34 (EC 3.4.19.12) (Deubiquitinating enzyme 34) (Ubiquitin thioesterase 34) (Ubiquitin-specific-processing protease 34)
USP36	Q9P275	1	1	Ubiquitin carboxyl-terminal hydrolase 36 (EC 3.4.19.12) (Deubiquitinating enzyme 36) (Ubiquitin thioesterase 36) (Ubiquitin-specific-processing protease 36)
USP48	Q86UV5	1	1	Ubiquitin carboxyl-terminal hydrolase 48 (EC 3.4.19.12) (Deubiquitinating enzyme 48) (Ubiquitin thioesterase 48) (Ubiquitin-specific-processing protease 48)
USP7	Q93009	2	2	Ubiquitin carboxyl-terminal hydrolase 7 (EC 3.4.19.12) (Deubiquitinating enzyme 7) (Herpesvirus-associated ubiquitin-specific protease) (Ubiquitin thioesterase 7) (Ubiquitin-specific-processing protease 7)
USP8	P40818	1	1	Ubiquitin carboxyl-terminal hydrolase 8 (EC 3.4.19.12) (Deubiquitinating enzyme 8) (Ubiquitin isopeptidase Y) (hUBPy) (Ubiquitin thioesterase 8) (Ubiquitin-specific-processing protease 8)
USP9X	Q93008	3	3	Probable ubiquitin carboxyl-terminal hydrolase FAF-X (EC 3.4.19.12) (Deubiquitinating enzyme FAF-X) (Fat facets in mammals) (hFAM) (Fat facets protein-related, X-linked) (Ubiquitin thioesterase FAF-X) (Ubiquitin-specific protease 9, X chromosome) (Ubiquitin-specific-processing protease FAF-X)
UTP20	O75691	1	1	Small subunit processome component 20 homolog (Down-regulated in metastasis protein) (Novel nucleolar protein 73) (NNP73) (Protein Key-1A6)
UTP3	Q9NQZ2	1	1	Something about silencing protein 10 (Charged amino acid-rich leucine zipper 1) (CRL1) (Disrupter of silencing SAS10) (UTP3 homolog)
VAMP8	Q9BV40	1	1	Vesicle-associated membrane protein 8 (VAMP-8) (Endobrevin) (EDB)
VAPB	O95292	1	1	Vesicle-associated membrane protein-associated protein B/C (VAMP-B/VAMP-C) (VAMP-associated protein B/C) (VAP-B/VAP-C)
VARS	P26640	3	4	Valine--tRNA ligase (EC 6.1.1.9) (Protein G7a) (Valyl-tRNA synthetase) (ValRS)
VARS2	Q5STZ8	1	2	Valine--tRNA ligase, mitochondrial (EC 6.1.1.9) (Valyl-tRNA synthetase) (ValRS) (Valyl-tRNA synthetase-like)
VASP	P50552	1	1	Vasodilator-stimulated phosphoprotein (VASP)
VAT1	Q99536	1	2	Synaptic vesicle membrane protein VAT-1 homolog (EC 1.-.-.-)
VBP1	P61758	1	2	Prefoldin subunit 3 (HIBBJ46) (Von Hippel-Lindau-binding protein 1) (VBP-1) (VHL-binding protein 1)
VCL	P18206	2	2	Vinculin (Metavinculin) (MV)
VCP	P55072	4	5	Transitional endoplasmic reticulum ATPase (TER ATPase) (EC 3.6.4.6) (15S Mg(2+)-ATPase p97 subunit) (Valosin-containing protein) (VCP)
VCPIP1	Q96JH7	1	1	Deubiquitinating protein VCIP135 (EC 3.4.19.12) (Valosin-containing protein p97/p47 complex-interacting protein 1) (Valosin-containing protein p97/p47 complex-interacting protein p135) (VCP/p47 complex-interacting 135-kDa protein)
VDAC2	P45880	2	2	Voltage-dependent anion-selective channel protein 2 (VDAC-2) (hVDAC2) (Outer mitochondrial membrane protein porin 2)
VDAC3	Q9Y277	1	2	Voltage-dependent anion-selective channel protein 3 (VDAC-3) (hVDAC3) (Outer mitochondrial membrane protein porin 3)
VIL1	P09327	7	8	Villin-1
VPS16	Q9H269	1	1	Vacuolar protein sorting-associated protein 16 homolog (hVPS16)
VPS26A	O75436	1	1	Vacuolar protein sorting-associated protein 26A (Vesicle protein sorting 26A) (hVPS26)
VPS29	Q9UBQ0	2	2	Vacuolar protein sorting-associated protein 29 (hVPS29) (EC 3.1.3.3) (PEP11 homolog) (Vesicle protein sorting 29)
VPS4B	O75351	1	1	Vacuolar protein sorting-associated protein 4B (EC 3.6.4.6) (Cell migration-inducing gene 1 protein) (Suppressor of K(+) transport growth defect 1) (Protein SKD1)
VPS52	Q8N1B4	2	2	Vacuolar protein sorting-associated protein 52 homolog (SAC2 suppressor of actin mutations 2-like protein)
VRK1	Q99986	1	1	Serine/threonine-protein kinase VRK1 (EC 2.7.11.1) (Vaccinia-related kinase 1)
VWA3A	A6NCI4	1	1	von Willebrand factor A domain-containing protein 3A
WARS	P23381	2	2	Tryptophan--tRNA ligase, cytoplasmic (EC 6.1.1.2) (Interferon-induced protein 53) (IFP53) (Tryptophanyl-tRNA synthetase) (TrpRS) (hWRS) [Cleaved into: T1-TrpRS; T2-TrpRS]
WBP11	Q9Y2W2	2	2	WW domain-binding protein 11 (WBP-11) (Npw38-binding protein) (NpwBP) (SH3 domain-binding protein SNP70) (Splicing factor that interacts with PQBP-1 and PP1)
WBP2	Q969T9	1	1	WW domain-binding protein 2 (WBP-2)
WBP5	Q9UHQ7	1	1	WW domain-binding protein 5 (WBP-5)
WDHD1	O75717	1	1	WD repeat and HMG-box DNA-binding protein 1 (Acidic nucleoplasmic DNA-binding protein 1) (And-1)
WDR26	Q9H7D7	1	1	WD repeat-containing protein 26 (CUL4- and DDB1-associated WDR protein 2) (Myocardial ischemic preconditioning up-regulated protein 2)
WDR43	Q15061	1	2	WD repeat-containing protein 43
WDR45B	Q5MNZ6	1	1	WD repeat domain phosphoinositide-interacting protein 3 (WIPI-3) (WD repeat-containing protein 45-like) (WDR45-like protein) (WD repeat-containing protein 45B) (WIPI49-like protein)
WDR48	Q8TAF3	1	1	WD repeat-containing protein 48 (USP1-associated factor 1) (WD repeat endosomal protein) (p80)
WNK1	Q9H4A3	1	1	Serine/threonine-protein kinase WNK1 (EC 2.7.11.1) (Erythrocyte 65 kDa protein) (p65) (Kinase deficient protein) (Protein kinase lysine-deficient 1) (Protein kinase with no lysine 1) (hWNK1)
XDH	P47989	1	2	Xanthine dehydrogenase/oxidase [Includes: Xanthine dehydrogenase (XD) (EC 1.17.1.4); Xanthine oxidase (XO) (EC 1.17.3.2) (Xanthine oxidoreductase) (XOR)]
XPO1	O14980	3	3	Exportin-1 (Exp1) (Chromosome region maintenance 1 protein homolog)
XRCC5	P13010	3	3	X-ray repair cross-complementing protein 5 (EC 3.6.4.-) (86 kDa subunit of Ku antigen) (ATP-dependent DNA helicase 2 subunit 2) (ATP-dependent DNA helicase II 80 kDa subunit) (CTC box-binding factor 85 kDa subunit) (CTC85) (CTCBF) (DNA repair protein XRCC5) (Ku80) (Ku86) (Lupus Ku autoantigen protein p86) (Nuclear factor IV) (Thyroid-lupus autoantigen) (TLAA) (X-ray repair complementing defective…
XRCC6	P12956	6	10	X-ray repair cross-complementing protein 6 (EC 3.6.4.-) (EC 4.2.99.-) (5'-deoxyribose-5-phosphate lyase Ku70) (5'-dRP lyase Ku70) (70 kDa subunit of Ku antigen) (ATP-dependent DNA helicase 2 subunit 1) (ATP-dependent DNA helicase II 70 kDa subunit) (CTC box-binding factor 75 kDa subunit) (CTC75) (CTCBF) (DNA repair protein XRCC6) (Lupus Ku autoantigen protein p70) (Ku70) (Thyroid-lupus autoantige…
XRN2	Q9H0D6	2	2	5'-3' exoribonuclease 2 (EC 3.1.13.-) (DHM1-like protein) (DHP protein)
YARS	P54577	2	3	Tyrosine--tRNA ligase, cytoplasmic (EC 6.1.1.1) (Tyrosyl-tRNA synthetase) (TyrRS) [Cleaved into: Tyrosine--tRNA ligase, cytoplasmic, N-terminally processed]
YBX1	P67809	1	2	Nuclease-sensitive element-binding protein 1 (CCAAT-binding transcription factor I subunit A) (CBF-A) (DNA-binding protein B) (DBPB) (Enhancer factor I subunit A) (EFI-A) (Y-box transcription factor) (Y-box-binding protein 1) (YB-1)
YBX3	P16989	2	3	Y-box-binding protein 3 (Cold shock domain-containing protein A) (DNA-binding protein A) (Single-strand DNA-binding protein NF-GMB)
YIPF5	Q969M3	1	1	Protein YIPF5 (Five-pass transmembrane protein localizing in the Golgi apparatus and the endoplasmic reticulum 5) (Smooth muscle cell-associated protein 5) (SMAP-5) (YIP1 family member 5) (YPT-interacting protein 1 A)
YTHDC1	Q96MU7	1	1	YTH domain-containing protein 1 (Putative splicing factor YT521) (YT521-B)
YTHDF3	Q7Z739	1	2	YTH domain-containing family protein 3
YWHAB	P31946	1	1	14-3-3 protein beta/alpha (Protein 1054) (Protein kinase C inhibitor protein 1) (KCIP-1) [Cleaved into: 14-3-3 protein beta/alpha, N-terminally processed]
YWHAE	P62258	1	1	14-3-3 protein epsilon (14-3-3E)
YWHAG	P61981	2	2	14-3-3 protein gamma (Protein kinase C inhibitor protein 1) (KCIP-1) [Cleaved into: 14-3-3 protein gamma, N-terminally processed]
YWHAZ	P63104	1	1	14-3-3 protein zeta/delta (Protein kinase C inhibitor protein 1) (KCIP-1)
ZC3H15	Q8WU90	1	1	Zinc finger CCCH domain-containing protein 15 (DRG family-regulatory protein 1) (Likely ortholog of mouse immediate early response erythropoietin 4)
ZC3H18	Q86VM9	2	2	Zinc finger CCCH domain-containing protein 18 (Nuclear protein NHN1)
ZCCHC11	Q5TAX3	1	2	Terminal uridylyltransferase 4 (TUTase 4) (EC 2.7.7.52) (Zinc finger CCHC domain-containing protein 11)
ZCCHC3	Q9NUD5	1	1	Zinc finger CCHC domain-containing protein 3
ZFAND6	Q6FIF0	1	1	AN1-type zinc finger protein 6 (Associated with PRK1 protein) (Zinc finger A20 domain-containing protein 3)
ZFR	Q96KR1	2	2	Zinc finger RNA-binding protein (hZFR) (M-phase phosphoprotein homolog)
ZFX	P17010	1	1	Zinc finger X-chromosomal protein
ZFYVE26	Q68DK2	1	1	Zinc finger FYVE domain-containing protein 26 (FYVE domain-containing centrosomal protein) (FYVE-CENT) (Spastizin)
ZMPSTE24	O75844	1	2	CAAX prenyl protease 1 homolog (EC 3.4.24.84) (Farnesylated proteins-converting enzyme 1) (FACE-1) (Prenyl protein-specific endoprotease 1) (Zinc metalloproteinase Ste24 homolog)
ZNF207	O43670	1	1	Zinc finger protein 207
ZNF334	Q9HCZ1	1	1	Zinc finger protein 334
ZNF41	P51814	1	1	Zinc finger protein 41
ZNF512B	Q96KM6	1	1	Zinc finger protein 512B
ZNF621	Q6ZSS3	1	1	Zinc finger protein 621
ZNF675	Q8TD23	1	1	Zinc finger protein 675 (TRAF6-binding zinc finger protein) (TRAF6-inhibitory zinc finger protein)
ZRANB2	O95218	2	2	Zinc finger Ran-binding domain-containing protein 2 (Zinc finger protein 265) (Zinc finger, splicing)
