# Supplementary material for: Systematic study of the dynamics and half-lives of newly synthesized proteins in human cells
Source: Chem Sci. 2015 Nov 16;7(2):1393–400. doi: 10.1039/c5sc03826j (PMC5975921; doi:10.1039/c5sc03826j)
Supplement: Supplementary file 3 [file SC-007-C5SC03826J-s003.xlsx]

## Sheet: Ident
Table S2 - 137 newly synthesized transcription factors were identified in the S phase
Gene Symbol	Uniprot ID	Unique_peptide_hit	Total_peptide_hit	Annotation
ADNP	Q9H2P0	1	2	Activity-dependent neuroprotector homeobox protein (Activity-dependent neuroprotective protein)
AFF1	P51825	1	1	AF4/FMR2 family member 1 (ALL1-fused gene from chromosome 4 protein) (Protein AF-4) (Protein FEL) (Proto-oncogene AF4)
APEX1	P27695	1	1	DNA-(apurinic or apyrimidinic site) lyase (EC 3.1.-.-) (EC 4.2.99.18) (APEX nuclease) (APEN) (Apurinic-apyrimidinic endonuclease 1) (AP endonuclease 1) (APE-1) (REF-1) (Redox factor-1) [Cleaved into: DNA-(apurinic or apyrimidinic site) lyase, mitochondrial]
ARID1A	O14497	1	1	AT-rich interactive domain-containing protein 1A (ARID domain-containing protein 1A) (B120) (BRG1-associated factor 250) (BAF250) (BRG1-associated factor 250a) (BAF250A) (Osa homolog 1) (hOSA1) (SWI-like protein) (SWI/SNF complex protein p270) (SWI/SNF-related, matrix-associated, actin-dependent regulator of chromatin subfamily F member 1) (hELD)
ARID1B	Q8NFD5	1	1	AT-rich interactive domain-containing protein 1B (ARID domain-containing protein 1B) (BRG1-associated factor 250b) (BAF250B) (BRG1-binding protein hELD/OSA1) (Osa homolog 2) (hOsa2) (p250R)
ASCC3	Q8N3C0	2	3	Activating signal cointegrator 1 complex subunit 3 (EC 3.6.4.12) (ASC-1 complex subunit p200) (ASC1p200) (Helicase, ATP binding 1) (Trip4 complex subunit p200)
ASH2L	Q9UBL3	1	1	Set1/Ash2 histone methyltransferase complex subunit ASH2 (ASH2-like protein)
BARD1	Q99728	1	1	BRCA1-associated RING domain protein 1 (BARD-1) (EC 6.3.2.-)
BAZ1B	Q9UIG0	1	1	Tyrosine-protein kinase BAZ1B (EC 2.7.10.2) (Bromodomain adjacent to zinc finger domain protein 1B) (Williams syndrome transcription factor) (Williams-Beuren syndrome chromosomal region 10 protein) (Williams-Beuren syndrome chromosomal region 9 protein) (hWALp2)
BCLAF1	Q9NYF8	4	4	Bcl-2-associated transcription factor 1 (Btf)
BTF3	P20290	3	4	Transcription factor BTF3 (Nascent polypeptide-associated complex subunit beta) (NAC-beta) (RNA polymerase B transcription factor 3)
BZW1	Q7L1Q6	5	6	Basic leucine zipper and W2 domain-containing protein 1 (Protein Orf)
CEBPZ	Q03701	1	1	CCAAT/enhancer-binding protein zeta (CCAAT-box-binding transcription factor) (CBF) (CCAAT-binding factor)
CENPB	P07199	1	1	Major centromere autoantigen B (Centromere protein B) (CENP-B)
CHD2	O14647	1	1	Chromodomain-helicase-DNA-binding protein 2 (CHD-2) (EC 3.6.4.12) (ATP-dependent helicase CHD2)
CHD4	Q14839	3	5	Chromodomain-helicase-DNA-binding protein 4 (CHD-4) (EC 3.6.4.12) (ATP-dependent helicase CHD4) (Mi-2 autoantigen 218 kDa protein) (Mi2-beta)
CHD7	Q9P2D1	1	1	Chromodomain-helicase-DNA-binding protein 7 (CHD-7) (EC 3.6.4.12) (ATP-dependent helicase CHD7)
CSDE1	O75534	2	2	Cold shock domain-containing protein E1 (N-ras upstream gene protein) (Protein UNR)
CTNNB1	P35222	3	5	Catenin beta-1 (Beta-catenin)
CTNNBIP1	Q9NSA3	1	1	Beta-catenin-interacting protein 1 (Inhibitor of beta-catenin and Tcf-4)
DDB2	Q92466	2	3	DNA damage-binding protein 2 (DDB p48 subunit) (DDBb) (Damage-specific DNA-binding protein 2) (UV-damaged DNA-binding protein 2) (UV-DDB 2)
DDX5	P17844	1	1	Probable ATP-dependent RNA helicase DDX5 (EC 3.6.4.13) (DEAD box protein 5) (RNA helicase p68)
DEK	P35659	2	2	Protein DEK
DENND4A	Q7Z401	1	1	C-myc promoter-binding protein (DENN domain-containing protein 4A)
DHX38	Q92620	1	1	Pre-mRNA-splicing factor ATP-dependent RNA helicase PRP16 (EC 3.6.4.13) (ATP-dependent RNA helicase DHX38) (DEAH box protein 38)
DIDO1	Q9BTC0	1	1	Death-inducer obliterator 1 (DIO-1) (hDido1) (Death-associated transcription factor 1) (DATF-1)
DNMT1	P26358	2	2	DNA (cytosine-5)-methyltransferase 1 (Dnmt1) (EC 2.1.1.37) (CXXC-type zinc finger protein 9) (DNA methyltransferase HsaI) (DNA MTase HsaI) (M.HsaI) (MCMT)
EIF5B	O60841	4	4	Eukaryotic translation initiation factor 5B (eIF-5B) (Translation initiation factor IF-2)
ENO1	P06733	8	14	Alpha-enolase (EC 4.2.1.11) (2-phospho-D-glycerate hydro-lyase) (C-myc promoter-binding protein) (Enolase 1) (MBP-1) (MPB-1) (Non-neural enolase) (NNE) (Phosphopyruvate hydratase) (Plasminogen-binding protein)
ESRRA	P11474	1	1	Steroid hormone receptor ERR1 (Estrogen receptor-like 1) (Estrogen-related receptor alpha) (ERR-alpha) (Nuclear receptor subfamily 3 group B member 1)
EWSR1	Q01844	2	2	RNA-binding protein EWS (EWS oncogene) (Ewing sarcoma breakpoint region 1 protein)
FOXK2	Q01167	1	1	Forkhead box protein K2 (Cellular transcription factor ILF-1) (FOXK1) (Interleukin enhancer-binding factor 1)
FOXP4	Q8IVH2	1	1	Forkhead box protein P4 (Fork head-related protein-like A)
FUBP1	Q96AE4	1	1	Far upstream element-binding protein 1 (FBP) (FUSE-binding protein 1) (DNA helicase V) (hDH V)
GTF2F1	P35269	1	1	General transcription factor IIF subunit 1 (General transcription factor IIF 74 kDa subunit) (Transcription initiation factor IIF subunit alpha) (TFIIF-alpha) (Transcription initiation factor RAP74)
GTF2I	P78347	1	1	General transcription factor II-I (GTFII-I) (TFII-I) (Bruton tyrosine kinase-associated protein 135) (BAP-135) (BTK-associated protein 135) (SRF-Phox1-interacting protein) (SPIN) (Williams-Beuren syndrome chromosomal region 6 protein)
GTF3C1	Q12789	1	1	General transcription factor 3C polypeptide 1 (TF3C-alpha) (TFIIIC box B-binding subunit) (Transcription factor IIIC 220 kDa subunit) (TFIIIC 220 kDa subunit) (TFIIIC220) (Transcription factor IIIC subunit alpha)
GTF3C2	Q8WUA4	1	1	General transcription factor 3C polypeptide 2 (TF3C-beta) (Transcription factor IIIC 110 kDa subunit) (TFIIIC 110 kDa subunit) (TFIIIC110) (Transcription factor IIIC subunit beta)
H1F0	P07305	3	10	Histone H1.0 (Histone H1') (Histone H1(0)) [Cleaved into: Histone H1.0, N-terminally processed]
H1FX	Q92522	2	2	Histone H1x
HCFC1	P51610	2	3	Host cell factor 1 (HCF) (HCF-1) (C1 factor) (CFF) (VCAF) (VP16 accessory protein) [Cleaved into: HCF N-terminal chain 1; HCF N-terminal chain 2; HCF N-terminal chain 3; HCF N-terminal chain 4; HCF N-terminal chain 5; HCF N-terminal chain 6; HCF C-terminal chain 1; HCF C-terminal chain 2; HCF C-terminal chain 3; HCF C-terminal chain 4; HCF C-terminal chain 5; HCF C-terminal chain 6]
HDGF	P51858	4	4	Hepatoma-derived growth factor (HDGF) (High mobility group protein 1-like 2) (HMG-1L2)
HIST1H1B	P16401	7	17	Histone H1.5 (Histone H1a) (Histone H1b) (Histone H1s-3)
HIST1H1C	P16403	2	9	Histone H1.2 (Histone H1c) (Histone H1d) (Histone H1s-1)
HIST1H1D	P16402	4	16	Histone H1.3 (Histone H1c) (Histone H1s-2)
HIST1H1E	P10412	3	10	Histone H1.4 (Histone H1b) (Histone H1s-4)
HMGA1	P17096	1	1	High mobility group protein HMG-I/HMG-Y (HMG-I(Y)) (High mobility group AT-hook protein 1) (High mobility group protein A1) (High mobility group protein R)
HMGA2	P52926	1	1	High mobility group protein HMGI-C (High mobility group AT-hook protein 2)
HMGB2	P26583	2	3	High mobility group protein B2 (High mobility group protein 2) (HMG-2)
HMGN1	P05114	1	1	Non-histone chromosomal protein HMG-14 (High mobility group nucleosome-binding domain-containing protein 1)
HMGN2	P05204	2	2	Non-histone chromosomal protein HMG-17 (High mobility group nucleosome-binding domain-containing protein 2)
ILF2	Q12905	2	3	Interleukin enhancer-binding factor 2 (Nuclear factor of activated T-cells 45 kDa)
ILF3	Q12906	2	3	Interleukin enhancer-binding factor 3 (Double-stranded RNA-binding protein 76) (DRBP76) (M-phase phosphoprotein 4) (MPP4) (Nuclear factor associated with dsRNA) (NFAR) (Nuclear factor of activated T-cells 90 kDa) (NF-AT-90) (Translational control protein 80) (TCP80)
JARID2	Q92833	1	1	Protein Jumonji (Jumonji/ARID domain-containing protein 2)
KHDRBS1	Q07666	2	2	KH domain-containing, RNA-binding, signal transduction-associated protein 1 (GAP-associated tyrosine phosphoprotein p62) (Src-associated in mitosis 68 kDa protein) (Sam68) (p21 Ras GTPase-activating protein-associated p62) (p68)
KHSRP	Q92945	1	2	Far upstream element-binding protein 2 (FUSE-binding protein 2) (KH type-splicing regulatory protein) (KSRP) (p75)
MATR3	P43243	4	4	Matrin-3
MCM3	P25205	3	5	DNA replication licensing factor MCM3 (EC 3.6.4.12) (DNA polymerase alpha holoenzyme-associated protein P1) (P1-MCM3) (RLF subunit beta) (p102)
MCM5	P33992	1	1	DNA replication licensing factor MCM5 (EC 3.6.4.12) (CDC46 homolog) (P1-CDC46)
MKL2	Q9ULH7	1	1	MKL/myocardin-like protein 2 (Megakaryoblastic leukemia 2) (Myocardin-related transcription factor B) (MRTF-B)
MTA1	Q13330	1	1	Metastasis-associated protein MTA1
MYBBP1A	Q9BQG0	1	1	Myb-binding protein 1A
NAP1L4	Q99733	1	1	Nucleosome assembly protein 1-like 4 (Nucleosome assembly protein 2) (NAP-2)
NFXL1	Q6ZNB6	1	2	NF-X1-type zinc finger protein NFXL1 (Ovarian zinc finger protein) (hOZFP)
NME2	P22392	2	2	Nucleoside diphosphate kinase B (NDK B) (NDP kinase B) (EC 2.7.4.6) (C-myc purine-binding transcription factor PUF) (Histidine protein kinase NDKB) (EC 2.7.13.3) (nm23-H2)
NPM1	P06748	6	6	Nucleophosmin (NPM) (Nucleolar phosphoprotein B23) (Nucleolar protein NO38) (Numatrin)
PA2G4	Q9UQ80	1	1	Proliferation-associated protein 2G4 (Cell cycle protein p38-2G4 homolog) (hG4-1) (ErbB3-binding protein 1)
PAPOLA	P51003	1	2	Poly(A) polymerase alpha (PAP-alpha) (EC 2.7.7.19) (Polynucleotide adenylyltransferase alpha)
PARP1	P09874	11	13	Poly [ADP-ribose] polymerase 1 (PARP-1) (EC 2.4.2.30) (ADP-ribosyltransferase diphtheria toxin-like 1) (ARTD1) (NAD(+) ADP-ribosyltransferase 1) (ADPRT 1) (Poly[ADP-ribose] synthase 1)
PDCD11	Q14690	1	1	Protein RRP5 homolog (NF-kappa-B-binding protein) (NFBP) (Programmed cell death protein 11)
PEG3	Q9GZU2	6	8	Paternally-expressed gene 3 protein (Zinc finger and SCAN domain-containing protein 24)
PHB2	Q99623	1	1	Prohibitin-2 (B-cell receptor-associated protein BAP37) (D-prohibitin) (Repressor of estrogen receptor activity)
PHF14	O94880	1	1	PHD finger protein 14
PHF3	Q92576	1	1	PHD finger protein 3
PHF8	Q9UPP1	1	1	Histone lysine demethylase PHF8 (EC 1.14.11.27) (PHD finger protein 8)
PIAS1	O75925	1	1	E3 SUMO-protein ligase PIAS1 (EC 6.3.2.-) (DEAD/H box-binding protein 1) (Gu-binding protein) (GBP) (Protein inhibitor of activated STAT protein 1) (RNA helicase II-binding protein)
POLR1A	O95602	1	1	DNA-directed RNA polymerase I subunit RPA1 (RNA polymerase I subunit A1) (EC 2.7.7.6) (A190) (DNA-directed RNA polymerase I largest subunit) (DNA-directed RNA polymerase I subunit A) (RNA polymerase I 194 kDa subunit) (RPA194)
POLR2A	P24928	2	2	DNA-directed RNA polymerase II subunit RPB1 (RNA polymerase II subunit B1) (EC 2.7.7.6) (DNA-directed RNA polymerase II subunit A) (DNA-directed RNA polymerase III largest subunit) (RNA-directed RNA polymerase II subunit RPB1) (EC 2.7.7.48)
POLR2B	P30876	1	2	DNA-directed RNA polymerase II subunit RPB2 (EC 2.7.7.6) (DNA-directed RNA polymerase II 140 kDa polypeptide) (DNA-directed RNA polymerase II subunit B) (RNA polymerase II subunit 2) (RNA polymerase II subunit B2)
POLR2G	P62487	1	1	DNA-directed RNA polymerase II subunit RPB7 (RNA polymerase II subunit B7) (DNA-directed RNA polymerase II subunit G) (RNA polymerase II 19 kDa subunit) (RPB19)
POLR3C	Q9BUI4	1	1	DNA-directed RNA polymerase III subunit RPC3 (RNA polymerase III subunit C3) (DNA-directed RNA polymerase III subunit C) (RNA polymerase III 62 kDa subunit) (RPC62)
PRDM10	Q9NQV6	2	2	PR domain zinc finger protein 10 (EC 2.1.1.-) (PR domain-containing protein 10) (Tristanin)
PSIP1	O75475	1	1	PC4 and SFRS1-interacting protein (CLL-associated antigen KW-7) (Dense fine speckles 70 kDa protein) (DFS 70) (Lens epithelium-derived growth factor) (Transcriptional coactivator p75/p52)
RBM14	Q96PK6	1	1	RNA-binding protein 14 (Paraspeckle protein 2) (PSP2) (RNA-binding motif protein 14) (RRM-containing coactivator activator/modulator) (Synaptotagmin-interacting protein) (SYT-interacting protein)
RBMX	P38159	2	2	RNA-binding motif protein, X chromosome (Glycoprotein p43) (Heterogeneous nuclear ribonucleoprotein G) (hnRNP G) [Cleaved into: RNA-binding motif protein, X chromosome, N-terminally processed]
RFC1	P35251	4	4	Replication factor C subunit 1 (Activator 1 140 kDa subunit) (A1 140 kDa subunit) (Activator 1 large subunit) (Activator 1 subunit 1) (DNA-binding protein PO-GA) (Replication factor C 140 kDa subunit) (RF-C 140 kDa subunit) (RFC140) (Replication factor C large subunit)
RNPS1	Q15287	1	1	RNA-binding protein with serine-rich domain 1 (SR-related protein LDC2)
RREB1	Q92766	2	2	Ras-responsive element-binding protein 1 (RREB-1) (Finger protein in nuclear bodies) (Raf-responsive zinc finger protein LZ321) (Zinc finger motif enhancer-binding protein 1) (Zep-1)
RXRB	P28702	1	2	Retinoic acid receptor RXR-beta (Nuclear receptor subfamily 2 group B member 2) (Retinoid X receptor beta)
SAFB	Q15424	2	2	Scaffold attachment factor B1 (SAF-B) (SAF-B1) (HSP27 estrogen response element-TATA box-binding protein) (HSP27 ERE-TATA-binding protein)
SAFB2	Q14151	1	1	Scaffold attachment factor B2 (SAF-B2)
SAP18	O00422	2	2	Histone deacetylase complex subunit SAP18 (18 kDa Sin3-associated polypeptide) (2HOR0202) (Cell growth-inhibiting gene 38 protein) (Sin3-associated polypeptide p18)
SF1	Q15637	1	1	Splicing factor 1 (Mammalian branch point-binding protein) (BBP) (mBBP) (Transcription factor ZFM1) (Zinc finger gene in MEN1 locus) (Zinc finger protein 162)
SFPQ	P23246	3	4	Splicing factor, proline- and glutamine-rich (100 kDa DNA-pairing protein) (hPOMp100) (DNA-binding p52/p100 complex, 100 kDa subunit) (Polypyrimidine tract-binding protein-associated-splicing factor) (PSF) (PTB-associated-splicing factor)
SIN3A	Q96ST3	1	2	Paired amphipathic helix protein Sin3a (Histone deacetylase complex subunit Sin3a) (Transcriptional corepressor Sin3a)
SIRT5	Q9NXA8	1	1	NAD-dependent protein deacylase sirtuin-5, mitochondrial (EC 3.5.1.-) (Regulatory protein SIR2 homolog 5) (SIR2-like protein 5)
SMARCA1	P28370	6	6	Probable global transcription activator SNF2L1 (EC 3.6.4.-) (ATP-dependent helicase SMARCA1) (Nucleosome-remodeling factor subunit SNF2L) (SWI/SNF-related matrix-associated actin-dependent regulator of chromatin subfamily A member 1)
SMARCA4	P51532	1	1	Transcription activator BRG1 (EC 3.6.4.-) (ATP-dependent helicase SMARCA4) (BRG1-associated factor 190A) (BAF190A) (Mitotic growth and transcription activator) (Protein BRG-1) (Protein brahma homolog 1) (SNF2-beta) (SWI/SNF-related matrix-associated actin-dependent regulator of chromatin subfamily A member 4)
SMARCA5	O60264	2	2	SWI/SNF-related matrix-associated actin-dependent regulator of chromatin subfamily A member 5 (SWI/SNF-related matrix-associated actin-dependent regulator of chromatin A5) (EC 3.6.4.-) (Sucrose nonfermenting protein 2 homolog) (hSNF2H)
SMARCC1	Q92922	4	5	SWI/SNF complex subunit SMARCC1 (BRG1-associated factor 155) (BAF155) (SWI/SNF complex 155 kDa subunit) (SWI/SNF-related matrix-associated actin-dependent regulator of chromatin subfamily C member 1)
SMARCC2	Q8TAQ2	1	1	SWI/SNF complex subunit SMARCC2 (BRG1-associated factor 170) (BAF170) (SWI/SNF complex 170 kDa subunit) (SWI/SNF-related matrix-associated actin-dependent regulator of chromatin subfamily C member 2)
SMARCD2	Q92925	1	1	SWI/SNF-related matrix-associated actin-dependent regulator of chromatin subfamily D member 2 (60 kDa BRG-1/Brm-associated factor subunit B) (BRG1-associated factor 60B) (BAF60B)
SND1	Q7KZF4	1	1	Staphylococcal nuclease domain-containing protein 1 (100 kDa coactivator) (EBNA2 coactivator p100) (Tudor domain-containing protein 11) (p100 co-activator)
SP100	P23497	1	1	Nuclear autoantigen Sp-100 (Nuclear dot-associated Sp100 protein) (Speckled 100 kDa)
SPEN	Q96T58	1	2	Msx2-interacting protein (SMART/HDAC1-associated repressor protein) (SPEN homolog)
SSB	P05455	1	1	Lupus La protein (La autoantigen) (La ribonucleoprotein) (Sjoegren syndrome type B antigen) (SS-B)
SSRP1	Q08945	3	3	FACT complex subunit SSRP1 (Chromatin-specific transcription elongation factor 80 kDa subunit) (Facilitates chromatin transcription complex 80 kDa subunit) (FACT 80 kDa subunit) (FACTp80) (Facilitates chromatin transcription complex subunit SSRP1) (Recombination signal sequence recognition protein 1) (Structure-specific recognition protein 1) (hSSRP1) (T160)
STAT3	P40763	1	1	Signal transducer and activator of transcription 3 (Acute-phase response factor)
STAT6	P42226	1	1	Signal transducer and activator of transcription 6 (IL-4 Stat)
SUPT16H	Q9Y5B9	3	3	FACT complex subunit SPT16 (Chromatin-specific transcription elongation factor 140 kDa subunit) (FACT 140 kDa subunit) (FACTp140) (Facilitates chromatin transcription complex subunit SPT16) (hSPT16)
SUPT6H	Q7KZ85	2	3	Transcription elongation factor SPT6 (hSPT6) (Histone chaperone suppressor of Ty6) (Tat-cotransactivator 2 protein) (Tat-CT2 protein)
TAF15	Q92804	3	5	TATA-binding protein-associated factor 2N (68 kDa TATA-binding protein-associated factor) (TAF(II)68) (TAFII68) (RNA-binding protein 56)
TARDBP	Q13148	1	1	TAR DNA-binding protein 43 (TDP-43)
TBX3	O15119	1	1	T-box transcription factor TBX3 (T-box protein 3)
TCEA1	P23193	1	1	Transcription elongation factor A protein 1 (Transcription elongation factor S-II protein 1) (Transcription elongation factor TFIIS.o)
TCEA3	O75764	2	2	Transcription elongation factor A protein 3 (Transcription elongation factor S-II protein 3) (Transcription elongation factor TFIIS.h)
TCOF1	Q13428	3	3	Treacle protein (Treacher Collins syndrome protein)
THRAP3	Q9Y2W1	3	4	Thyroid hormone receptor-associated protein 3 (Thyroid hormone receptor-associated protein complex 150 kDa component) (Trap150)
TIAL1	Q01085	1	2	Nucleolysin TIAR (TIA-1-related protein)
TIMELESS	Q9UNS1	2	2	Protein timeless homolog (hTIM)
TOP2B	Q02880	3	4	DNA topoisomerase 2-beta (EC 5.99.1.3) (DNA topoisomerase II, beta isozyme)
TRIM24	O15164	1	1	Transcription intermediary factor 1-alpha (TIF1-alpha) (EC 6.3.2.-) (E3 ubiquitin-protein ligase TRIM24) (RING finger protein 82) (Tripartite motif-containing protein 24)
TRIM25	Q14258	3	4	E3 ubiquitin/ISG15 ligase TRIM25 (EC 6.3.2.19) (EC 6.3.2.n3) (Estrogen-responsive finger protein) (RING finger protein 147) (Tripartite motif-containing protein 25) (Ubiquitin/ISG15-conjugating enzyme TRIM25) (Zinc finger protein 147)
TRIM33	Q9UPN9	1	1	E3 ubiquitin-protein ligase TRIM33 (EC 6.3.2.-) (Ectodermin homolog) (RET-fused gene 7 protein) (Protein Rfg7) (Transcription intermediary factor 1-gamma) (TIF1-gamma) (Tripartite motif-containing protein 33)
TTF2	Q9UNY4	1	1	Transcription termination factor 2 (EC 3.6.4.-) (Lodestar homolog) (RNA polymerase II termination factor) (Transcription release factor 2) (F2) (HuF2)
UPF1	Q92900	3	3	Regulator of nonsense transcripts 1 (EC 3.6.4.-) (ATP-dependent helicase RENT1) (Nonsense mRNA reducing factor 1) (NORF1) (Up-frameshift suppressor 1 homolog) (hUpf1)
WBP11	Q9Y2W2	2	2	WW domain-binding protein 11 (WBP-11) (Npw38-binding protein) (NpwBP) (SH3 domain-binding protein SNP70) (Splicing factor that interacts with PQBP-1 and PP1)
WDHD1	O75717	1	1	WD repeat and HMG-box DNA-binding protein 1 (Acidic nucleoplasmic DNA-binding protein 1) (And-1)
XRCC5	P13010	3	3	X-ray repair cross-complementing protein 5 (EC 3.6.4.-) (86 kDa subunit of Ku antigen) (ATP-dependent DNA helicase 2 subunit 2) (ATP-dependent DNA helicase II 80 kDa subunit) (CTC box-binding factor 85 kDa subunit) (CTC85) (CTCBF) (DNA repair protein XRCC5) (Ku80) (Ku86) (Lupus Ku autoantigen protein p86) (Nuclear factor IV) (Thyroid-lupus autoantigen) (TLAA) (X-ray repair complementing defective…
XRCC6	P12956	6	10	X-ray repair cross-complementing protein 6 (EC 3.6.4.-) (EC 4.2.99.-) (5'-deoxyribose-5-phosphate lyase Ku70) (5'-dRP lyase Ku70) (70 kDa subunit of Ku antigen) (ATP-dependent DNA helicase 2 subunit 1) (ATP-dependent DNA helicase II 70 kDa subunit) (CTC box-binding factor 75 kDa subunit) (CTC75) (CTCBF) (DNA repair protein XRCC6) (Lupus Ku autoantigen protein p70) (Ku70) (Thyroid-lupus autoantige…
YBX1	P67809	1	2	Nuclease-sensitive element-binding protein 1 (CCAAT-binding transcription factor I subunit A) (CBF-A) (DNA-binding protein B) (DBPB) (Enhancer factor I subunit A) (EFI-A) (Y-box transcription factor) (Y-box-binding protein 1) (YB-1)
YTHDC1	Q96MU7	1	1	YTH domain-containing protein 1 (Putative splicing factor YT521) (YT521-B)
ZFX	P17010	1	1	Zinc finger X-chromosomal protein
ZNF207	O43670	1	1	Zinc finger protein 207
ZNF334	Q9HCZ1	1	1	Zinc finger protein 334
ZNF41	P51814	1	1	Zinc finger protein 41
ZNF675	Q8TD23	1	1	Zinc finger protein 675 (TRAF6-binding zinc finger protein) (TRAF6-inhibitory zinc finger protein)
