# Supplementary material for: Systematic study of the dynamics and half-lives of newly synthesized proteins in human cells
Source: Chem Sci. 2015 Nov 16;7(2):1393–400. doi: 10.1039/c5sc03826j (PMC5975921; doi:10.1039/c5sc03826j)
Supplement: Supplementary file 4 [file SC-007-C5SC03826J-s004.xlsx]

## Sheet: Quant
Table S3 - The half-lives of 803 newly synthesized proteins in the S phase were quantified
Gene Symbol	Uniprot ID	# of Unique peptide for quantification	# of total peptide for quantification	t1/2 (hour)	Annotation
A2M	P01023	2	3	1.02868	Alpha-2-macroglobulin (Alpha-2-M) (C3 and PZP-like alpha-2-macroglobulin domain-containing protein 5)
AARS	P49588	6	6	8.75075	Alanine--tRNA ligase, cytoplasmic (EC 6.1.1.7) (Alanyl-tRNA synthetase) (AlaRS) (Renal carcinoma antigen NY-REN-42)
ABAT	P80404	1	2	11.3668	4-aminobutyrate aminotransferase, mitochondrial (EC 2.6.1.19) ((S)-3-amino-2-methylpropionate transaminase) (EC 2.6.1.22) (GABA aminotransferase) (GABA-AT) (Gamma-amino-N-butyrate transaminase) (GABA transaminase) (GABA-T) (L-AIBAT)
ABCC2	Q92887	2	2	13.0635	Canalicular multispecific organic anion transporter 1 (ATP-binding cassette sub-family C member 2) (Canalicular multidrug resistance protein) (Multidrug resistance-associated protein 2)
ABCE1	P61221	1	1	11.1906	ATP-binding cassette sub-family E member 1 (2'-5'-oligoadenylate-binding protein) (HuHP68) (RNase L inhibitor) (Ribonuclease 4 inhibitor) (RNS4I)
ABCF1	Q8NE71	3	3	12.5684	ATP-binding cassette sub-family F member 1 (ATP-binding cassette 50) (TNF-alpha-stimulated ABC protein)
ABCF2	Q9UG63	2	2	8.78291	ATP-binding cassette sub-family F member 2 (Iron-inhibited ABC transporter 2)
ABHD10	Q9NUJ1	1	2	13.4801	Mycophenolic acid acyl-glucuronide esterase, mitochondrial (EC 3.1.1.93) (Alpha/beta hydrolase domain-containing protein 10) (Abhydrolase domain-containing protein 10)
ABI2	Q9NYB9	1	2	9.04302	Abl interactor 2 (Abelson interactor 2) (Abi-2) (Abl-binding protein 3) (AblBP3) (Arg-binding protein 1) (ArgBP1)
ACAA2	P42765	1	1	7.23158	3-ketoacyl-CoA thiolase, mitochondrial (EC 2.3.1.16) (Acetyl-CoA acyltransferase) (Beta-ketothiolase) (Mitochondrial 3-oxoacyl-CoA thiolase) (T1)
ACAD9	Q9H845	1	1	8.97975	Acyl-CoA dehydrogenase family member 9, mitochondrial (ACAD-9) (EC 1.3.99.-)
ACADSB	P45954	2	2	10.654	Short/branched chain specific acyl-CoA dehydrogenase, mitochondrial (SBCAD) (EC 1.3.8.5) (2-methyl branched chain acyl-CoA dehydrogenase) (2-MEBCAD) (2-methylbutyryl-coenzyme A dehydrogenase) (2-methylbutyryl-CoA dehydrogenase)
ACADVL	P49748	5	6	7.82333	Very long-chain specific acyl-CoA dehydrogenase, mitochondrial (VLCAD) (EC 1.3.8.9)
ACAT2	Q9BWD1	1	1	7.4548	Acetyl-CoA acetyltransferase, cytosolic (EC 2.3.1.9) (Acetyl-CoA transferase-like protein) (Cytosolic acetoacetyl-CoA thiolase)
ACBD5	Q5T8D3	1	1	7.42525	Acyl-CoA-binding domain-containing protein 5
ACIN1	Q9UKV3	3	3	15.9638	Apoptotic chromatin condensation inducer in the nucleus (Acinus)
ACLY	P53396	4	4	6.9073	ATP-citrate synthase (EC 2.3.3.8) (ATP-citrate (pro-S-)-lyase) (ACL) (Citrate cleavage enzyme)
ACOT13	Q9NPJ3	1	1	11.9118	Acyl-coenzyme A thioesterase 13 (Acyl-CoA thioesterase 13) (EC 3.1.2.-) (Thioesterase superfamily member 2) [Cleaved into: Acyl-coenzyme A thioesterase 13, N-terminally processed]
ACOT2	P49753	2	4	6.76571	Acyl-coenzyme A thioesterase 2, mitochondrial (Acyl-CoA thioesterase 2) (EC 3.1.2.2) (Acyl-coenzyme A thioester hydrolase 2a) (CTE-Ia) (Long-chain acyl-CoA thioesterase 2) (ZAP128)
ACSF2	Q96CM8	3	4	8.73421	Acyl-CoA synthetase family member 2, mitochondrial (EC 6.2.1.-)
ACSL3	O95573	4	5	7.89911	Long-chain-fatty-acid--CoA ligase 3 (EC 6.2.1.3) (Long-chain acyl-CoA synthetase 3) (LACS 3)
ACSL4	O60488	2	2	4.21264	Long-chain-fatty-acid--CoA ligase 4 (EC 6.2.1.3) (Long-chain acyl-CoA synthetase 4) (LACS 4)
ACSS2	Q9NR19	1	2	4.81553	Acetyl-coenzyme A synthetase, cytoplasmic (EC 6.2.1.1) (Acetate--CoA ligase) (Acetyl-CoA synthetase) (ACS) (AceCS) (Acyl-CoA synthetase short-chain family member 2) (Acyl-activating enzyme)
ACSS3	Q9H6R3	2	3	9.64177	Acyl-CoA synthetase short-chain family member 3, mitochondrial (EC 6.2.1.1) (Acyl-CoA synthetase short-chain family member 3)
ACTA2	P62736	2	8	10.5438	Actin, aortic smooth muscle (Alpha-actin-2) (Cell growth-inhibiting gene 46 protein)
ACTN4	O43707	2	2	13.5248	Alpha-actinin-4 (F-actin cross-linking protein) (Non-muscle alpha-actinin 4)
ADNP	Q9H2P0	1	1	18.0272	Activity-dependent neuroprotector homeobox protein (Activity-dependent neuroprotective protein)
ADPGK	Q9BRR6	1	1	11.4286	ADP-dependent glucokinase (ADP-GK) (ADPGK) (EC 2.7.1.147) (RbBP-35)
AFG3L2	Q9Y4W6	3	3	13.2991	AFG3-like protein 2 (EC 3.4.24.-) (Paraplegin-like protein)
AFP	P02771	5	8	0.761717	Alpha-fetoprotein (Alpha-1-fetoprotein) (Alpha-fetoglobulin)
AGK	Q53H12	1	1	20.7281	Acylglycerol kinase, mitochondrial (hAGK) (EC 2.7.1.107) (EC 2.7.1.94) (Multiple substrate lipid kinase) (HsMuLK) (MuLK) (Multi-substrate lipid kinase)
AHCY	P23526	2	3	9.03006	Adenosylhomocysteinase (AdoHcyase) (EC 3.3.1.1) (S-adenosyl-L-homocysteine hydrolase)
AHNAK	Q09666	20	22	6.48165	Neuroblast differentiation-associated protein AHNAK (Desmoyokin)
AHSA1	O95433	1	2	9.023	Activator of 90 kDa heat shock protein ATPase homolog 1 (AHA1) (p38)
AIFM1	O95831	3	4	11.4646	Apoptosis-inducing factor 1, mitochondrial (EC 1.1.1.-) (Programmed cell death protein 8)
AK2	P54819	1	3	10.0238	Adenylate kinase 2, mitochondrial (AK 2) (EC 2.7.4.3) (ATP-AMP transphosphorylase 2) (ATP:AMP phosphotransferase) (Adenylate monophosphate kinase) [Cleaved into: Adenylate kinase 2, mitochondrial, N-terminally processed]
AK3	Q9UIJ7	1	2	8.54682	GTP:AMP phosphotransferase AK3, mitochondrial (EC 2.7.4.10) (Adenylate kinase 3) (AK 3) (Adenylate kinase 3 alpha-like 1)
AKAP1	Q92667	2	2	10.0036	A-kinase anchor protein 1, mitochondrial (A-kinase anchor protein 149 kDa) (AKAP 149) (Dual specificity A-kinase-anchoring protein 1) (D-AKAP-1) (Protein kinase A-anchoring protein 1) (PRKA1) (Spermatid A-kinase anchor protein 84) (S-AKAP84)
AKR1C3	P42330	3	3	7.21202	Aldo-keto reductase family 1 member C3 (EC 1.-.-.-) (17-beta-hydroxysteroid dehydrogenase type 5) (17-beta-HSD 5) (3-alpha-HSD type II, brain) (3-alpha-hydroxysteroid dehydrogenase type 2) (3-alpha-HSD type 2) (EC 1.1.1.357) (Chlordecone reductase homolog HAKRb) (Dihydrodiol dehydrogenase 3) (DD-3) (DD3) (Dihydrodiol dehydrogenase type I) (HA1753) (Indanol dehydrogenase) (EC 1.1.1.112) (Prostagla…
ALDH1A1	P00352	2	2	8.15659	Retinal dehydrogenase 1 (RALDH 1) (RalDH1) (EC 1.2.1.36) (ALDH-E1) (ALHDII) (Aldehyde dehydrogenase family 1 member A1) (Aldehyde dehydrogenase, cytosolic)
ALDH1B1	P30837	2	2	10.3162	Aldehyde dehydrogenase X, mitochondrial (EC 1.2.1.3) (Aldehyde dehydrogenase 5) (Aldehyde dehydrogenase family 1 member B1)
ALDH2	P05091	1	1	6.31627	Aldehyde dehydrogenase, mitochondrial (EC 1.2.1.3) (ALDH class 2) (ALDH-E2) (ALDHI)
ALDH3A2	P51648	1	2	6.80824	Fatty aldehyde dehydrogenase (EC 1.2.1.3) (Aldehyde dehydrogenase 10) (Aldehyde dehydrogenase family 3 member A2) (Microsomal aldehyde dehydrogenase)
ALDH4A1	P30038	3	4	8.89677	Delta-1-pyrroline-5-carboxylate dehydrogenase, mitochondrial (P5C dehydrogenase) (EC 1.2.1.88) (Aldehyde dehydrogenase family 4 member A1) (L-glutamate gamma-semialdehyde dehydrogenase)
ALDH5A1	P51649	2	2	9.26543	Succinate-semialdehyde dehydrogenase, mitochondrial (EC 1.2.1.24) (Aldehyde dehydrogenase family 5 member A1) (NAD(+)-dependent succinic semialdehyde dehydrogenase)
ALDH6A1	Q02252	2	4	9.00776	Methylmalonate-semialdehyde dehydrogenase [acylating], mitochondrial (MMSDH) (Malonate-semialdehyde dehydrogenase [acylating]) (EC 1.2.1.18) (EC 1.2.1.27) (Aldehyde dehydrogenase family 6 member A1)
ALDH7A1	P49419	2	3	9.09523	Alpha-aminoadipic semialdehyde dehydrogenase (Alpha-AASA dehydrogenase) (EC 1.2.1.31) (Aldehyde dehydrogenase family 7 member A1) (EC 1.2.1.3) (Antiquitin-1) (Betaine aldehyde dehydrogenase) (EC 1.2.1.8) (Delta1-piperideine-6-carboxylate dehydrogenase) (P6c dehydrogenase)
ALDOA	P04075	6	8	10.7298	Fructose-bisphosphate aldolase A (EC 4.1.2.13) (Lung cancer antigen NY-LU-1) (Muscle-type aldolase)
ANXA4	P09525	2	2	10.5102	Annexin A4 (35-beta calcimedin) (Annexin IV) (Annexin-4) (Carbohydrate-binding protein p33/p41) (Chromobindin-4) (Endonexin I) (Lipocortin IV) (P32.5) (PP4-X) (Placental anticoagulant protein II) (PAP-II) (Protein II)
ANXA5	P08758	1	1	8.80634	Annexin A5 (Anchorin CII) (Annexin V) (Annexin-5) (Calphobindin I) (CBP-I) (Endonexin II) (Lipocortin V) (Placental anticoagulant protein 4) (PP4) (Placental anticoagulant protein I) (PAP-I) (Thromboplastin inhibitor) (Vascular anticoagulant-alpha) (VAC-alpha)
ANXA6	P08133	4	4	8.41198	Annexin A6 (67 kDa calelectrin) (Annexin VI) (Annexin-6) (Calphobindin-II) (CPB-II) (Chromobindin-20) (Lipocortin VI) (Protein III) (p68) (p70)
AP1B1	Q10567	1	2	9.97191	AP-1 complex subunit beta-1 (Adapter-related protein complex 1 subunit beta-1) (Adaptor protein complex AP-1 subunit beta-1) (Beta-1-adaptin) (Beta-adaptin 1) (Clathrin assembly protein complex 1 beta large chain) (Golgi adaptor HA1/AP1 adaptin beta subunit)
AP2A2	O94973	1	1	8.69804	AP-2 complex subunit alpha-2 (100 kDa coated vesicle protein C) (Adapter-related protein complex 2 subunit alpha-2) (Adaptor protein complex AP-2 subunit alpha-2) (Alpha-adaptin C) (Alpha2-adaptin) (Clathrin assembly protein complex 2 alpha-C large chain) (Huntingtin yeast partner J) (Huntingtin-interacting protein 9) (HIP-9) (Huntingtin-interacting protein J) (Plasma membrane adaptor HA2/AP2 ada…
AP2B1	P63010	1	1	5.7394	AP-2 complex subunit beta (AP105B) (Adapter-related protein complex 2 subunit beta) (Adaptor protein complex AP-2 subunit beta) (Beta-2-adaptin) (Beta-adaptin) (Clathrin assembly protein complex 2 beta large chain) (Plasma membrane adaptor HA2/AP2 adaptin beta subunit)
AP2M1	Q96CW1	1	1	10.5727	AP-2 complex subunit mu (AP-2 mu chain) (Adapter-related protein complex 2 subunit mu) (Adaptin-mu2) (Adaptor protein complex AP-2 subunit mu) (Clathrin assembly protein complex 2 mu medium chain) (Clathrin coat assembly protein AP50) (Clathrin coat-associated protein AP50) (HA2 50 kDa subunit) (Plasma membrane adaptor AP-2 50 kDa protein)
AP3B1	O00203	2	2	9.24813	AP-3 complex subunit beta-1 (Adapter-related protein complex 3 subunit beta-1) (Adaptor protein complex AP-3 subunit beta-1) (Beta-3A-adaptin) (Clathrin assembly protein complex 3 beta-1 large chain)
AP3D1	O14617	2	2	10.7415	AP-3 complex subunit delta-1 (AP-3 complex subunit delta) (Adapter-related protein complex 3 subunit delta-1) (Delta-adaptin)
APMAP	Q9HDC9	2	3	12.0568	Adipocyte plasma membrane-associated protein (Protein BSCv)
APOB	P04114	11	11	1.34287	Apolipoprotein B-100 (Apo B-100) [Cleaved into: Apolipoprotein B-48 (Apo B-48)]
ARCN1	P48444	1	1	9.94615	Coatomer subunit delta (Archain) (Delta-coat protein) (Delta-COP)
ARFGAP3	Q9NP61	1	3	6.9691	ADP-ribosylation factor GTPase-activating protein 3 (ARF GAP 3)
ARFGEF1	Q9Y6D6	1	1	12.6118	Brefeldin A-inhibited guanine nucleotide-exchange protein 1 (Brefeldin A-inhibited GEP 1) (ADP-ribosylation factor guanine nucleotide-exchange factor 1) (p200 ARF guanine nucleotide exchange factor) (p200 ARF-GEP1)
ARHGAP1	Q07960	2	3	8.11743	Rho GTPase-activating protein 1 (CDC42 GTPase-activating protein) (GTPase-activating protein rhoOGAP) (Rho-related small GTPase protein activator) (Rho-type GTPase-activating protein 1) (p50-RhoGAP)
ARHGAP18	Q8N392	2	2	9.53435	Rho GTPase-activating protein 18 (MacGAP) (Rho-type GTPase-activating protein 18)
ARL5B	Q96KC2	1	1	3.46799	ADP-ribosylation factor-like protein 5B (ADP-ribosylation factor-like protein 8)
ARL6IP1	Q15041	1	1	7.10046	ADP-ribosylation factor-like protein 6-interacting protein 1 (ARL-6-interacting protein 1) (Aip-1)
ARMC1	Q9NVT9	1	1	6.61022	Armadillo repeat-containing protein 1
ARPC1B	O15143	2	2	9.74616	Actin-related protein 2/3 complex subunit 1B (Arp2/3 complex 41 kDa subunit) (p41-ARC)
ARPC2	O15144	2	2	6.40913	Actin-related protein 2/3 complex subunit 2 (Arp2/3 complex 34 kDa subunit) (p34-ARC)
ARPC3	O15145	2	2	5.64176	Actin-related protein 2/3 complex subunit 3 (Arp2/3 complex 21 kDa subunit) (p21-ARC)
ASCC3	Q8N3C0	1	1	8.0636	Activating signal cointegrator 1 complex subunit 3 (EC 3.6.4.12) (ASC-1 complex subunit p200) (ASC1p200) (Helicase, ATP binding 1) (Trip4 complex subunit p200)
ASNS	P08243	2	2	11.4061	Asparagine synthetase [glutamine-hydrolyzing] (EC 6.3.5.4) (Cell cycle control protein TS11) (Glutamine-dependent asparagine synthetase)
ASPH	Q12797	1	1	10.3316	Aspartyl/asparaginyl beta-hydroxylase (EC 1.14.11.16) (Aspartate beta-hydroxylase) (ASP beta-hydroxylase) (Peptide-aspartate beta-dioxygenase)
ATAD1	Q8NBU5	1	1	12.0715	ATPase family AAA domain-containing protein 1 (EC 3.6.1.3) (Thorase)
ATIC	P31939	3	3	10.6934	Bifunctional purine biosynthesis protein PURH [Includes: Phosphoribosylaminoimidazolecarboxamide formyltransferase (EC 2.1.2.3) (5-aminoimidazole-4-carboxamide ribonucleotide formyltransferase) (AICAR transformylase); IMP cyclohydrolase (EC 3.5.4.10) (ATIC) (IMP synthase) (Inosinicase)]
ATP1A1	P05023	4	5	10.8542	Sodium/potassium-transporting ATPase subunit alpha-1 (Na(+)/K(+) ATPase alpha-1 subunit) (EC 3.6.3.9) (Sodium pump subunit alpha-1)
ATP1B1	P05026	4	6	6.43471	Sodium/potassium-transporting ATPase subunit beta-1 (Sodium/potassium-dependent ATPase subunit beta-1)
ATP2A2	P16615	1	1	13.509	Sarcoplasmic/endoplasmic reticulum calcium ATPase 2 (SERCA2) (SR Ca(2+)-ATPase 2) (EC 3.6.3.8) (Calcium pump 2) (Calcium-transporting ATPase sarcoplasmic reticulum type, slow twitch skeletal muscle isoform) (Endoplasmic reticulum class 1/2 Ca(2+) ATPase)
ATP5B	P06576	1	1	3.76874	ATP synthase subunit beta, mitochondrial (EC 3.6.3.14)
ATP5L	O75964	1	1	11.1564	ATP synthase subunit g, mitochondrial (ATPase subunit g)
ATP5O	P48047	1	3	11.7882	ATP synthase subunit O, mitochondrial (Oligomycin sensitivity conferral protein) (OSCP)
ATP6V1A	P38606	2	2	5.1766	V-type proton ATPase catalytic subunit A (V-ATPase subunit A) (EC 3.6.3.14) (V-ATPase 69 kDa subunit) (Vacuolar ATPase isoform VA68) (Vacuolar proton pump subunit alpha)
ATP6V1E1	P36543	1	2	7.86684	V-type proton ATPase subunit E 1 (V-ATPase subunit E 1) (V-ATPase 31 kDa subunit) (p31) (Vacuolar proton pump subunit E 1)
ATXN2L	Q8WWM7	1	1	6.34808	Ataxin-2-like protein (Ataxin-2 domain protein) (Ataxin-2-related protein)
BAIAP2	Q9UQB8	1	1	7.69565	Brain-specific angiogenesis inhibitor 1-associated protein 2 (BAI-associated protein 2) (BAI1-associated protein 2) (Protein BAP2) (Fas ligand-associated factor 3) (FLAF3) (Insulin receptor substrate p53/p58) (IRS-58) (IRSp53/58) (Insulin receptor substrate protein of 53 kDa) (IRSp53) (Insulin receptor substrate p53)
BCAP31	P51572	3	3	11.5717	B-cell receptor-associated protein 31 (BCR-associated protein 31) (Bap31) (6C6-AG tumor-associated antigen) (Protein CDM) (p28)
BCL2L2	Q92843	1	2	7.99754	Bcl-2-like protein 2 (Bcl2-L-2) (Apoptosis regulator Bcl-W)
BCLAF1	Q9NYF8	2	2	4.8772	Bcl-2-associated transcription factor 1 (Btf)
BPTF	Q12830	1	1	13.1402	Nucleosome-remodeling factor subunit BPTF (Bromodomain and PHD finger-containing transcription factor) (Fetal Alz-50 clone 1 protein) (Fetal Alzheimer antigen)
BTF3	P20290	1	1	6.83982	Transcription factor BTF3 (Nascent polypeptide-associated complex subunit beta) (NAC-beta) (RNA polymerase B transcription factor 3)
BUB3	O43684	1	1	7.2695	Mitotic checkpoint protein BUB3
BZW1	Q7L1Q6	4	5	5.96512	Basic leucine zipper and W2 domain-containing protein 1 (Protein Orf)
C19orf43	Q9BQ61	1	2	13.4435	Uncharacterized protein C19orf43
C3	P01024	9	11	0.974836	Complement C3 (C3 and PZP-like alpha-2-macroglobulin domain-containing protein 1) [Cleaved into: Complement C3 beta chain; Complement C3 alpha chain; C3a anaphylatoxin; Acylation stimulating protein (ASP) (C3adesArg); Complement C3b alpha' chain; Complement C3c alpha' chain fragment 1; Complement C3dg fragment; Complement C3g fragment; Complement C3d fragment; Complement C3f fragment; Complement …
C4A	P0C0L4	2	2	2.28197	Complement C4-A (Acidic complement C4) (C3 and PZP-like alpha-2-macroglobulin domain-containing protein 2) [Cleaved into: Complement C4 beta chain; Complement C4-A alpha chain; C4a anaphylatoxin; C4b-A; C4d-A; Complement C4 gamma chain]
C4BPA	P04003	2	2	4.97879	C4b-binding protein alpha chain (C4bp) (Proline-rich protein) (PRP)
C7orf50	Q9BRJ6	1	2	9.15529	Uncharacterized protein C7orf50
C7orf55	Q96HJ9	2	2	12.4242	UPF0562 protein C7orf55
CAD	P27708	1	1	4.08479	CAD protein [Includes: Glutamine-dependent carbamoyl-phosphate synthase (EC 6.3.5.5); Aspartate carbamoyltransferase (EC 2.1.3.2); Dihydroorotase (EC 3.5.2.3)]
CALM1	P62158	1	2	11.539	Calmodulin (CaM)
CAND1	Q86VP6	3	4	10.6213	Cullin-associated NEDD8-dissociated protein 1 (Cullin-associated and neddylation-dissociated protein 1) (TBP-interacting protein of 120 kDa A) (TBP-interacting protein 120A) (p120 CAND1)
CANX	P27824	1	2	9.68624	Calnexin (IP90) (Major histocompatibility complex class I antigen-binding protein p88) (p90)
CAP1	Q01518	2	2	6.97542	Adenylyl cyclase-associated protein 1 (CAP 1)
CBLL1	Q75N03	1	1	22.1524	E3 ubiquitin-protein ligase Hakai (EC 6.3.2.-) (Casitas B-lineage lymphoma-transforming sequence-like protein 1) (RING finger protein 188) (c-Cbl-like protein 1)
CBX5	P45973	1	1	15.6114	Chromobox protein homolog 5 (Antigen p25) (Heterochromatin protein 1 homolog alpha) (HP1 alpha)
CCDC59	Q9P031	1	1	6.44788	Thyroid transcription factor 1-associated protein 26 (TTF-1-associated protein 26) (Coiled-coil domain-containing protein 59) (TTF-1-associated protein BR2)
CCNB1	P14635	2	2	6.93841	G2/mitotic-specific cyclin-B1
CCT3	P49368	1	1	4.36876	T-complex protein 1 subunit gamma (TCP-1-gamma) (CCT-gamma) (hTRiC5)
CCT4	P50991	4	4	10.8	T-complex protein 1 subunit delta (TCP-1-delta) (CCT-delta) (Stimulator of TAR RNA-binding)
CCT5	P48643	2	2	5.99712	T-complex protein 1 subunit epsilon (TCP-1-epsilon) (CCT-epsilon)
CCT6A	P40227	2	2	5.84096	T-complex protein 1 subunit zeta (TCP-1-zeta) (Acute morphine dependence-related protein 2) (CCT-zeta-1) (HTR3) (Tcp20)
CCT7	Q99832	3	3	6.16131	T-complex protein 1 subunit eta (TCP-1-eta) (CCT-eta) (HIV-1 Nef-interacting protein)
CCT8	P50990	2	3	9.82073	T-complex protein 1 subunit theta (TCP-1-theta) (CCT-theta) (Renal carcinoma antigen NY-REN-15)
CDC25C	P30307	1	1	6.86284	M-phase inducer phosphatase 3 (EC 3.1.3.48) (Dual specificity phosphatase Cdc25C)
CDK1	P06493	1	1	7.88474	Cyclin-dependent kinase 1 (CDK1) (EC 2.7.11.22) (EC 2.7.11.23) (Cell division control protein 2 homolog) (Cell division protein kinase 1) (p34 protein kinase)
CDK13	Q14004	1	2	14.6698	Cyclin-dependent kinase 13 (EC 2.7.11.22) (EC 2.7.11.23) (CDC2-related protein kinase 5) (Cell division cycle 2-like protein kinase 5) (Cell division protein kinase 13) (hCDK13) (Cholinesterase-related cell division controller)
CDV3	Q9UKY7	1	1	7.53175	Protein CDV3 homolog
CENPM	Q9NSP4	1	1	3.42989	Centromere protein M (CENP-M) (Interphase centromere complex protein 39) (Proliferation-associated nuclear element protein 1)
CFDP1	Q9UEE9	1	1	7.68456	Craniofacial development protein 1 (Bucentaur)
CFI	P05156	2	2	2.0545	Complement factor I (EC 3.4.21.45) (C3B/C4B inactivator) [Cleaved into: Complement factor I heavy chain; Complement factor I light chain]
CFL1	P23528	2	2	9.34287	Cofilin-1 (18 kDa phosphoprotein) (p18) (Cofilin, non-muscle isoform)
CHCHD2	Q9Y6H1	1	2	1.1872	Coiled-coil-helix-coiled-coil-helix domain-containing protein 2, mitochondrial (Aging-associated gene 10 protein) (HCV NS2 trans-regulated protein) (NS2TP)
CHCHD3	Q9NX63	1	1	15.2006	Coiled-coil-helix-coiled-coil-helix domain-containing protein 3, mitochondrial
CHD4	Q14839	3	4	6.28135	Chromodomain-helicase-DNA-binding protein 4 (CHD-4) (EC 3.6.4.12) (ATP-dependent helicase CHD4) (Mi-2 autoantigen 218 kDa protein) (Mi2-beta)
CKAP4	Q07065	3	3	10.0007	Cytoskeleton-associated protein 4 (63-kDa cytoskeleton-linking membrane protein) (Climp-63) (p63)
CKAP5	Q14008	1	1	7.70677	Cytoskeleton-associated protein 5 (Colonic and hepatic tumor overexpressed gene protein) (Ch-TOG)
CLIC1	O00299	3	5	10.0108	Chloride intracellular channel protein 1 (Chloride channel ABP) (Nuclear chloride ion channel 27) (NCC27) (Regulatory nuclear chloride ion channel protein) (hRNCC)
CLIC5	Q9NZA1	1	1	10.237	Chloride intracellular channel protein 5
CLINT1	Q14677	3	3	8.61588	Clathrin interactor 1 (Clathrin-interacting protein localized in the trans-Golgi region) (Clint) (Enthoprotin) (Epsin-4) (Epsin-related protein) (EpsinR)
CLPX	O76031	2	2	9.28529	ATP-dependent Clp protease ATP-binding subunit clpX-like, mitochondrial
CLTC	Q00610	2	2	9.48218	Clathrin heavy chain 1 (Clathrin heavy chain on chromosome 17) (CLH-17)
CNN2	Q99439	1	1	7.24519	Calponin-2 (Calponin H2, smooth muscle) (Neutral calponin)
CNN3	Q15417	1	1	9.86406	Calponin-3 (Calponin, acidic isoform)
CNP	P09543	1	1	6.73678	2',3'-cyclic-nucleotide 3'-phosphodiesterase (CNP) (CNPase) (EC 3.1.4.37)
COBLL1	Q53SF7	2	3	8.41811	Cordon-bleu protein-like 1
COLGALT1	Q8NBJ5	1	1	9.25677	Procollagen galactosyltransferase 1 (EC 2.4.1.50) (Collagen beta(1-O)galactosyltransferase 1) (Glycosyltransferase 25 family member 1) (Hydroxylysine galactosyltransferase 1)
COPA	P53621	3	4	7.87309	Coatomer subunit alpha (Alpha-coat protein) (Alpha-COP) (HEP-COP) (HEPCOP) [Cleaved into: Xenin (Xenopsin-related peptide); Proxenin]
COPB1	P53618	1	1	11.0058	Coatomer subunit beta (Beta-coat protein) (Beta-COP)
COPG1	Q9Y678	1	2	10.5214	Coatomer subunit gamma-1 (Gamma-1-coat protein) (Gamma-1-COP)
COX4I1	P13073	1	1	4.20522	Cytochrome c oxidase subunit 4 isoform 1, mitochondrial (Cytochrome c oxidase polypeptide IV) (Cytochrome c oxidase subunit IV isoform 1) (COX IV-1)
COX5B	P10606	1	1	7.04704	Cytochrome c oxidase subunit 5B, mitochondrial (Cytochrome c oxidase polypeptide Vb)
COX6C	P09669	1	1	5.75321	Cytochrome c oxidase subunit 6C (Cytochrome c oxidase polypeptide VIc)
CP	P00450	1	1	2.54487	Ceruloplasmin (EC 1.16.3.1) (Ferroxidase)
CPSF6	Q16630	2	2	11.6339	Cleavage and polyadenylation specificity factor subunit 6 (Cleavage and polyadenylation specificity factor 68 kDa subunit) (CFIm68) (CPSF 68 kDa subunit) (Pre-mRNA cleavage factor Im 68 kDa subunit) (Protein HPBRII-4/7)
CRAT	P43155	2	2	14.814	Carnitine O-acetyltransferase (Carnitine acetylase) (EC 2.3.1.7) (Carnitine acetyltransferase) (CAT) (CrAT)
CRKL	P46109	1	1	8.38349	Crk-like protein
CS	O75390	3	3	13.4985	Citrate synthase, mitochondrial (EC 2.3.3.1)
CSDE1	O75534	2	2	5.50292	Cold shock domain-containing protein E1 (N-ras upstream gene protein) (Protein UNR)
CSE1L	P55060	3	4	8.82653	Exportin-2 (Exp2) (Cellular apoptosis susceptibility protein) (Chromosome segregation 1-like protein) (Importin-alpha re-exporter)
CSNK1A1	P48729	2	2	8.48302	Casein kinase I isoform alpha (CKI-alpha) (EC 2.7.11.1) (CK1)
CSRP1	P21291	2	3	11.2689	Cysteine and glycine-rich protein 1 (Cysteine-rich protein 1) (CRP) (CRP1)
CTGF	P29279	2	2	0.905921	Connective tissue growth factor (CCN family member 2) (Hypertrophic chondrocyte-specific protein 24) (Insulin-like growth factor-binding protein 8) (IBP-8) (IGF-binding protein 8) (IGFBP-8)
CTNNA1	P35221	4	4	4.61145	Catenin alpha-1 (Alpha E-catenin) (Cadherin-associated protein) (Renal carcinoma antigen NY-REN-13)
CTNNA2	P26232	1	1	5.15504	Catenin alpha-2 (Alpha N-catenin) (Alpha-catenin-related protein)
CTNNB1	P35222	2	3	7.20153	Catenin beta-1 (Beta-catenin)
CTNND1	O60716	1	1	7.38805	Catenin delta-1 (Cadherin-associated Src substrate) (CAS) (p120 catenin) (p120(ctn)) (p120(cas))
CTPS1	P17812	1	1	13.5037	CTP synthase 1 (EC 6.3.4.2) (CTP synthetase 1) (UTP--ammonia ligase 1)
CTSA	P10619	1	2	8.11743	Lysosomal protective protein (EC 3.4.16.5) (Carboxypeptidase C) (Carboxypeptidase L) (Cathepsin A) (Protective protein cathepsin A) (PPCA) (Protective protein for beta-galactosidase) [Cleaved into: Lysosomal protective protein 32 kDa chain; Lysosomal protective protein 20 kDa chain]
CTSB	P07858	1	1	4.98273	Cathepsin B (EC 3.4.22.1) (APP secretase) (APPS) (Cathepsin B1) [Cleaved into: Cathepsin B light chain; Cathepsin B heavy chain]
CTSD	P07339	2	3	8.64705	Cathepsin D (EC 3.4.23.5) [Cleaved into: Cathepsin D light chain; Cathepsin D heavy chain]
CUL1	Q13616	1	1	10.6099	Cullin-1 (CUL-1)
CUL2	Q13617	1	1	11.7842	Cullin-2 (CUL-2)
CUL3	Q13618	2	3	11.117	Cullin-3 (CUL-3)
CUL4B	Q13620	3	3	8.82316	Cullin-4B (CUL-4B)
CUL7	Q14999	1	2	5.95948	Cullin-7 (CUL-7)
CYP27A1	Q02318	1	1	10.6819	Sterol 26-hydroxylase, mitochondrial (EC 1.14.13.15) (5-beta-cholestane-3-alpha,7-alpha,12-alpha-triol 27-hydroxylase) (Cytochrome P-450C27/25) (Cytochrome P450 27) (Sterol 27-hydroxylase) (Vitamin D(3) 25-hydroxylase)
CYP51A1	Q16850	1	1	3.24492	Lanosterol 14-alpha demethylase (LDM) (EC 1.14.13.70) (CYPLI) (Cytochrome P450 51A1) (Cytochrome P450-14DM) (Cytochrome P45014DM) (Cytochrome P450LI) (Sterol 14-alpha demethylase)
DAK	Q3LXA3	2	2	5.63122	Bifunctional ATP-dependent dihydroxyacetone kinase/FAD-AMP lyase (cyclizing) [Includes: ATP-dependent dihydroxyacetone kinase (DHA kinase) (EC 2.7.1.28) (EC 2.7.1.29) (Glycerone kinase) (Triokinase) (Triose kinase); FAD-AMP lyase (cyclizing) (EC 4.6.1.15) (FAD-AMP lyase (cyclic FMN forming)) (FMN cyclase)]
DCXR	Q7Z4W1	1	2	13.6446	L-xylulose reductase (XR) (EC 1.1.1.10) (Carbonyl reductase II) (Dicarbonyl/L-xylulose reductase) (Kidney dicarbonyl reductase) (kiDCR) (Sperm surface protein P34H)
DDB2	Q92466	1	2	12.2638	DNA damage-binding protein 2 (DDB p48 subunit) (DDBb) (Damage-specific DNA-binding protein 2) (UV-damaged DNA-binding protein 2) (UV-DDB 2)
DDOST	P39656	3	4	4.19073	Dolichyl-diphosphooligosaccharide--protein glycosyltransferase 48 kDa subunit (DDOST 48 kDa subunit) (Oligosaccharyl transferase 48 kDa subunit) (EC 2.4.99.18)
DDX1	Q92499	3	3	9.80268	ATP-dependent RNA helicase DDX1 (EC 3.6.4.13) (DEAD box protein 1) (DEAD box protein retinoblastoma) (DBP-RB)
DDX17	Q92841	3	4	8.88309	Probable ATP-dependent RNA helicase DDX17 (EC 3.6.4.13) (DEAD box protein 17) (DEAD box protein p72) (RNA-dependent helicase p72)
DDX18	Q9NVP1	2	2	10.4943	ATP-dependent RNA helicase DDX18 (EC 3.6.4.13) (DEAD box protein 18) (Myc-regulated DEAD box protein) (MrDb)
DDX21	Q9NR30	6	8	11.1492	Nucleolar RNA helicase 2 (EC 3.6.4.13) (DEAD box protein 21) (Gu-alpha) (Nucleolar RNA helicase Gu) (Nucleolar RNA helicase II) (RH II/Gu)
DDX24	Q9GZR7	5	7	6.73743	ATP-dependent RNA helicase DDX24 (EC 3.6.4.13) (DEAD box protein 24)
DDX3X	O00571	1	1	8.20293	ATP-dependent RNA helicase DDX3X (EC 3.6.4.13) (DEAD box protein 3, X-chromosomal) (DEAD box, X isoform) (Helicase-like protein 2) (HLP2)
DDX41	Q9UJV9	2	2	5.23604	Probable ATP-dependent RNA helicase DDX41 (EC 3.6.4.13) (DEAD box protein 41) (DEAD box protein abstrakt homolog)
DDX42	Q86XP3	2	2	14.8426	ATP-dependent RNA helicase DDX42 (EC 3.6.4.13) (DEAD box protein 42) (RNA helicase-like protein) (RHELP) (RNA helicase-related protein) (RNAHP) (SF3b DEAD box protein) (Splicing factor 3B-associated 125 kDa protein) (SF3b125)
DDX46	Q7L014	4	4	8.78959	Probable ATP-dependent RNA helicase DDX46 (EC 3.6.4.13) (DEAD box protein 46) (PRP5 homolog)
DDX56	Q9NY93	1	1	7.23838	Probable ATP-dependent RNA helicase DDX56 (EC 3.6.4.13) (ATP-dependent 61 kDa nucleolar RNA helicase) (DEAD box protein 21) (DEAD box protein 56)
DDX6	P26196	1	1	13.4539	Probable ATP-dependent RNA helicase DDX6 (EC 3.6.4.13) (ATP-dependent RNA helicase p54) (DEAD box protein 6) (Oncogene RCK)
DECR1	Q16698	2	2	11.4665	2,4-dienoyl-CoA reductase, mitochondrial (EC 1.3.1.34) (2,4-dienoyl-CoA reductase [NADPH]) (4-enoyl-CoA reductase [NADPH])
DEK	P35659	2	2	10.1634	Protein DEK
DENND4A	Q7Z401	1	1	4.04427	C-myc promoter-binding protein (DENN domain-containing protein 4A)
DHCR24	Q15392	1	2	6.64507	Delta(24)-sterol reductase (EC 1.3.1.72) (24-dehydrocholesterol reductase) (3-beta-hydroxysterol delta-24-reductase) (Diminuto/dwarf1 homolog) (Seladin-1)
DHRS2	Q13268	3	3	7.2248	Dehydrogenase/reductase SDR family member 2, mitochondrial (EC 1.1.1.-) (Dicarbonyl reductase HEP27) (Protein D)
DHRS3	O75911	1	1	4.67616	Short-chain dehydrogenase/reductase 3 (EC 1.1.1.300) (DD83.1) (Retinal short-chain dehydrogenase/reductase 1) (retSDR1)
DHX30	Q7L2E3	2	2	9.319	Putative ATP-dependent RNA helicase DHX30 (EC 3.6.4.13) (DEAH box protein 30)
DHX37	Q8IY37	1	1	6.74465	Probable ATP-dependent RNA helicase DHX37 (EC 3.6.4.13) (DEAH box protein 37)
DHX38	Q92620	1	1	7.31014	Pre-mRNA-splicing factor ATP-dependent RNA helicase PRP16 (EC 3.6.4.13) (ATP-dependent RNA helicase DHX38) (DEAH box protein 38)
DHX9	Q08211	1	1	9.55933	ATP-dependent RNA helicase A (RHA) (EC 3.6.4.13) (DEAH box protein 9) (Leukophysin) (LKP) (Nuclear DNA helicase II) (NDH II)
DIP2B	Q9P265	3	4	13.6098	Disco-interacting protein 2 homolog B (DIP2 homolog B)
DKC1	O60832	2	2	7.53667	H/ACA ribonucleoprotein complex subunit 4 (EC 5.4.99.-) (CBF5 homolog) (Dyskerin) (Nopp140-associated protein of 57 kDa) (Nucleolar protein NAP57) (Nucleolar protein family A member 4) (snoRNP protein DKC1)
DNAJA1	P31689	1	1	5.43645	DnaJ homolog subfamily A member 1 (DnaJ protein homolog 2) (HSDJ) (Heat shock 40 kDa protein 4) (Heat shock protein J2) (HSJ-2) (Human DnaJ protein 2) (hDj-2)
DNAJA2	O60884	2	2	10.5937	DnaJ homolog subfamily A member 2 (Cell cycle progression restoration gene 3 protein) (Dnj3) (Dj3) (HIRA-interacting protein 4) (Renal carcinoma antigen NY-REN-14)
DNAJA3	Q96EY1	1	1	15.5345	DnaJ homolog subfamily A member 3, mitochondrial (DnaJ protein Tid-1) (hTid-1) (Hepatocellular carcinoma-associated antigen 57) (Tumorous imaginal discs protein Tid56 homolog)
DNAJB1	P25685	1	1	5.70351	DnaJ homolog subfamily B member 1 (DnaJ protein homolog 1) (Heat shock 40 kDa protein 1) (HSP40) (Heat shock protein 40) (Human DnaJ protein 1) (hDj-1)
DNAJB11	Q9UBS4	1	1	9.75577	DnaJ homolog subfamily B member 11 (APOBEC1-binding protein 2) (ABBP-2) (DnaJ protein homolog 9) (ER-associated DNAJ) (ER-associated Hsp40 co-chaperone) (Endoplasmic reticulum DNA J domain-containing protein 3) (ER-resident protein ERdj3) (ERdj3) (ERj3p) (HEDJ) (Human DnaJ protein 9) (hDj-9) (PWP1-interacting protein 4)
DNAJC9	Q8WXX5	1	1	13.5698	DnaJ homolog subfamily C member 9 (DnaJ protein SB73)
DNM2	P50570	1	1	9.98771	Dynamin-2 (EC 3.6.5.5)
DSP	P15924	5	6	6.41031	Desmoplakin (DP) (250/210 kDa paraneoplastic pemphigus antigen)
DYNC1H1	Q14204	2	2	6.25923	Cytoplasmic dynein 1 heavy chain 1 (Cytoplasmic dynein heavy chain 1) (Dynein heavy chain, cytosolic)
DYNC1I2	Q13409	1	1	4.08358	Cytoplasmic dynein 1 intermediate chain 2 (Cytoplasmic dynein intermediate chain 2) (Dynein intermediate chain 2, cytosolic) (DH IC-2)
ECHS1	P30084	2	2	6.16076	Enoyl-CoA hydratase, mitochondrial (EC 4.2.1.17) (Enoyl-CoA hydratase 1) (Short-chain enoyl-CoA hydratase) (SCEH)
ECI2	O75521	3	3	10.4421	Enoyl-CoA delta isomerase 2, mitochondrial (EC 5.3.3.8) (DRS-1) (Delta(3),delta(2)-enoyl-CoA isomerase) (D3,D2-enoyl-CoA isomerase) (Diazepam-binding inhibitor-related protein 1) (DBI-related protein 1) (Dodecenoyl-CoA isomerase) (Hepatocellular carcinoma-associated antigen 88) (Peroxisomal 3,2-trans-enoyl-CoA isomerase) (pECI) (Renal carcinoma antigen NY-REN-1)
EEF1A1P5	Q5VTE0	4	6	4.07255	Putative elongation factor 1-alpha-like 3 (EF-1-alpha-like 3) (Eukaryotic elongation factor 1 A-like 3) (eEF1A-like 3) (Eukaryotic translation elongation factor 1 alpha-1 pseudogene 5)
EEF1A2	Q05639	3	4	7.08667	Elongation factor 1-alpha 2 (EF-1-alpha-2) (Eukaryotic elongation factor 1 A-2) (eEF1A-2) (Statin-S1)
EEF2	P13639	5	5	5.43347	Elongation factor 2 (EF-2)
EFHD2	Q96C19	1	1	10.5502	EF-hand domain-containing protein D2 (Swiprosin-1)
EHBP1	Q8NDI1	1	1	7.54323	EH domain-binding protein 1
EHHADH	Q08426	1	1	12.5707	Peroxisomal bifunctional enzyme (PBE) (PBFE) [Includes: Enoyl-CoA hydratase/3,2-trans-enoyl-CoA isomerase (EC 4.2.1.17) (EC 5.3.3.8); 3-hydroxyacyl-CoA dehydrogenase (EC 1.1.1.35)]
EIF1AX	P47813	3	3	7.69565	Eukaryotic translation initiation factor 1A, X-chromosomal (eIF-1A X isoform) (Eukaryotic translation initiation factor 4C) (eIF-4C)
EIF2S2	P20042	4	6	6.32088	Eukaryotic translation initiation factor 2 subunit 2 (Eukaryotic translation initiation factor 2 subunit beta) (eIF-2-beta)
EIF3E	P60228	3	3	8.25077	Eukaryotic translation initiation factor 3 subunit E (eIF3e) (Eukaryotic translation initiation factor 3 subunit 6) (Viral integration site protein INT-6 homolog) (eIF-3 p48)
EIF3H	O15372	1	1	7.04418	Eukaryotic translation initiation factor 3 subunit H (eIF3h) (Eukaryotic translation initiation factor 3 subunit 3) (eIF-3-gamma) (eIF3 p40 subunit)
EIF3L	Q9Y262	1	1	12.2334	Eukaryotic translation initiation factor 3 subunit L (eIF3l) (Eukaryotic translation initiation factor 3 subunit 6-interacting protein) (Eukaryotic translation initiation factor 3 subunit E-interacting protein)
EIF4A1	P60842	1	3	5.97798	Eukaryotic initiation factor 4A-I (eIF-4A-I) (eIF4A-I) (EC 3.6.4.13) (ATP-dependent RNA helicase eIF4A-1)
EIF4A2	Q14240	1	1	5.73418	Eukaryotic initiation factor 4A-II (eIF-4A-II) (eIF4A-II) (EC 3.6.4.13) (ATP-dependent RNA helicase eIF4A-2)
EIF4A3	P38919	2	2	6.38963	Eukaryotic initiation factor 4A-III (eIF-4A-III) (eIF4A-III) (EC 3.6.4.13) (ATP-dependent RNA helicase DDX48) (ATP-dependent RNA helicase eIF4A-3) (DEAD box protein 48) (Eukaryotic initiation factor 4A-like NUK-34) (Eukaryotic translation initiation factor 4A isoform 3) (Nuclear matrix protein 265) (NMP 265) (hNMP 265) [Cleaved into: Eukaryotic initiation factor 4A-III, N-terminally processed]
EIF4B	P23588	1	1	7.37234	Eukaryotic translation initiation factor 4B (eIF-4B)
EIF4G1	Q04637	2	3	6.82836	Eukaryotic translation initiation factor 4 gamma 1 (eIF-4-gamma 1) (eIF-4G 1) (eIF-4G1) (p220)
EIF4G2	P78344	3	4	9.5871	Eukaryotic translation initiation factor 4 gamma 2 (eIF-4-gamma 2) (eIF-4G 2) (eIF4G 2) (Death-associated protein 5) (DAP-5) (p97)
EIF5	P55010	1	1	6.73482	Eukaryotic translation initiation factor 5 (eIF-5)
EIF5B	O60841	3	3	8.16139	Eukaryotic translation initiation factor 5B (eIF-5B) (Translation initiation factor IF-2)
EMC8	O43402	1	1	5.10606	ER membrane protein complex subunit 8 (Neighbor of COX4) (Protein FAM158B)
EMG1	Q92979	1	1	10.8	Ribosomal RNA small subunit methyltransferase NEP1 (EC 2.1.1.-) (18S rRNA (pseudouridine-N1-)-methyltransferase NEP1) (18S rRNA Psi1248 methyltransferase) (Nucleolar protein EMG1 homolog) (Protein C2f) (Ribosome biogenesis protein NEP1)
EML4	Q9HC35	1	1	7.53093	Echinoderm microtubule-associated protein-like 4 (EMAP-4) (Restrictedly overexpressed proliferation-associated protein) (Ropp 120)
ENO1	P06733	6	11	7.63126	Alpha-enolase (EC 4.2.1.11) (2-phospho-D-glycerate hydro-lyase) (C-myc promoter-binding protein) (Enolase 1) (MBP-1) (MPB-1) (Non-neural enolase) (NNE) (Phosphopyruvate hydratase) (Plasminogen-binding protein)
ENO3	P13929	1	3	7.73861	Beta-enolase (EC 4.2.1.11) (2-phospho-D-glycerate hydro-lyase) (Enolase 3) (Muscle-specific enolase) (MSE) (Skeletal muscle enolase)
ENSA	O43768	1	1	6.57323	Alpha-endosulfine (ARPP-19e)
EPB41L2	O43491	5	5	12.8814	Band 4.1-like protein 2 (Generally expressed protein 4.1) (4.1G)
EPHX1	P07099	2	2	19.0582	Epoxide hydrolase 1 (EC 3.3.2.9) (Epoxide hydratase) (Microsomal epoxide hydrolase)
EPRS	P07814	4	6	9.97908	Bifunctional glutamate/proline--tRNA ligase (Bifunctional aminoacyl-tRNA synthetase) (Cell proliferation-inducing gene 32 protein) (Glutamatyl-prolyl-tRNA synthetase) [Includes: Glutamate--tRNA ligase (EC 6.1.1.17) (Glutamyl-tRNA synthetase) (GluRS); Proline--tRNA ligase (EC 6.1.1.15) (Prolyl-tRNA synthetase)]
ERBB3	P21860	1	1	4.56559	Receptor tyrosine-protein kinase erbB-3 (EC 2.7.10.1) (Proto-oncogene-like protein c-ErbB-3) (Tyrosine kinase-type cell surface receptor HER3)
ERO1L	Q96HE7	2	2	9.07617	ERO1-like protein alpha (ERO1-L) (ERO1-L-alpha) (EC 1.8.4.-) (Endoplasmic oxidoreductin-1-like protein) (Oxidoreductin-1-L-alpha)
ERP29	P30040	1	1	11.7046	Endoplasmic reticulum resident protein 29 (ERp29) (Endoplasmic reticulum resident protein 28) (ERp28) (Endoplasmic reticulum resident protein 31) (ERp31)
ESD	P10768	1	1	11.0497	S-formylglutathione hydrolase (FGH) (EC 3.1.2.12) (Esterase D) (Methylumbelliferyl-acetate deacetylase) (EC 3.1.1.56)
ESF1	Q9H501	3	3	7.97638	ESF1 homolog (ABT1-associated protein)
ESRRA	P11474	1	1	5.21909	Steroid hormone receptor ERR1 (Estrogen receptor-like 1) (Estrogen-related receptor alpha) (ERR-alpha) (Nuclear receptor subfamily 3 group B member 1)
EWSR1	Q01844	1	1	18.6681	RNA-binding protein EWS (EWS oncogene) (Ewing sarcoma breakpoint region 1 protein)
EXOSC10	Q01780	2	2	6.17338	Exosome component 10 (EC 3.1.13.-) (Autoantigen PM/Scl 2) (P100 polymyositis-scleroderma overlap syndrome-associated autoantigen) (Polymyositis/scleroderma autoantigen 100 kDa) (PM/Scl-100) (Polymyositis/scleroderma autoantigen 2)
EZR	P15311	2	3	10.4768	Ezrin (Cytovillin) (Villin-2) (p81)
F5	P12259	1	1	0.768149	Coagulation factor V (Activated protein C cofactor) (Proaccelerin, labile factor) [Cleaved into: Coagulation factor V heavy chain; Coagulation factor V light chain]
FABP1	P07148	2	3	8.88309	Fatty acid-binding protein, liver (Fatty acid-binding protein 1) (Liver-type fatty acid-binding protein) (L-FABP)
FADS2	O95864	2	2	5.62163	Fatty acid desaturase 2 (EC 1.14.19.-) (Delta(6) fatty acid desaturase) (D6D) (Delta(6) desaturase) (Delta-6 desaturase)
FAM115A	Q9Y4C2	2	2	4.63489	Protein FAM115A
FAM169A	Q9Y6X4	1	1	7.46845	Soluble lamin-associated protein of 75 kDa (SLAP75) (Protein FAM169A)
FAM213A	Q9BRX8	1	1	11.0744	Redox-regulatory protein FAM213A (Peroxiredoxin-like 2 activated in M-CSF stimulated monocytes) (Protein PAMM)
FANCI	Q9NVI1	1	2	4.37069	Fanconi anemia group I protein (Protein FACI)
FARP1	Q9Y4F1	1	2	9.48347	FERM, RhoGEF and pleckstrin domain-containing protein 1 (Chondrocyte-derived ezrin-like protein) (Pleckstrin homology domain-containing family C member 2) (PH domain-containing family C member 2)
FASN	P49327	4	7	7.5845	Fatty acid synthase (EC 2.3.1.85) [Includes: [Acyl-carrier-protein] S-acetyltransferase (EC 2.3.1.38); [Acyl-carrier-protein] S-malonyltransferase (EC 2.3.1.39); 3-oxoacyl-[acyl-carrier-protein] synthase (EC 2.3.1.41); 3-oxoacyl-[acyl-carrier-protein] reductase (EC 1.1.1.100); 3-hydroxyacyl-[acyl-carrier-protein] dehydratase (EC 4.2.1.59); Enoyl-[acyl-carrier-protein] reductase (EC 1.3.1.39); Ole…
FDFT1	P37268	1	1	5.33847	Squalene synthase (SQS) (SS) (EC 2.5.1.21) (FPP:FPP farnesyltransferase) (Farnesyl-diphosphate farnesyltransferase)
FDPS	P14324	2	3	10.0704	Farnesyl pyrophosphate synthase (FPP synthase) (FPS) (EC 2.5.1.10) ((2E,6E)-farnesyl diphosphate synthase) (Dimethylallyltranstransferase) (EC 2.5.1.1) (Farnesyl diphosphate synthase) (Geranyltranstransferase)
FERMT2	Q96AC1	1	1	9.63507	Fermitin family homolog 2 (Kindlin-2) (Mitogen-inducible gene 2 protein) (MIG-2) (Pleckstrin homology domain-containing family C member 1) (PH domain-containing family C member 1)
FGA	P02671	1	1	1.40781	Fibrinogen alpha chain [Cleaved into: Fibrinopeptide A; Fibrinogen alpha chain]
FGG	P02679	2	2	1.58177	Fibrinogen gamma chain
FH	P07954	1	1	6.35041	Fumarate hydratase, mitochondrial (Fumarase) (EC 4.2.1.2)
FKBP4	Q02790	1	1	10.9693	Peptidyl-prolyl cis-trans isomerase FKBP4 (PPIase FKBP4) (EC 5.2.1.8) (51 kDa FK506-binding protein) (FKBP51) (52 kDa FK506-binding protein) (52 kDa FKBP) (FKBP-52) (59 kDa immunophilin) (p59) (FK506-binding protein 4) (FKBP-4) (FKBP59) (HSP-binding immunophilin) (HBI) (Immunophilin FKBP52) (Rotamase) [Cleaved into: Peptidyl-prolyl cis-trans isomerase FKBP4, N-terminally processed]
FLII	Q13045	1	1	3.60507	Protein flightless-1 homolog
FLNA	P21333	4	4	7.64472	Filamin-A (FLN-A) (Actin-binding protein 280) (ABP-280) (Alpha-filamin) (Endothelial actin-binding protein) (Filamin-1) (Non-muscle filamin)
FLNB	O75369	9	10	8.36629	Filamin-B (FLN-B) (ABP-278) (ABP-280 homolog) (Actin-binding-like protein) (Beta-filamin) (Filamin homolog 1) (Fh1) (Filamin-3) (Thyroid autoantigen) (Truncated actin-binding protein) (Truncated ABP)
FLNC	Q14315	2	2	8.32109	Filamin-C (FLN-C) (FLNc) (ABP-280-like protein) (ABP-L) (Actin-binding-like protein) (Filamin-2) (Gamma-filamin)
FN1	P02751	1	2	0.744207	Fibronectin (FN) (Cold-insoluble globulin) (CIG) [Cleaved into: Anastellin; Ugl-Y1; Ugl-Y2; Ugl-Y3]
FOXP4	Q8IVH2	1	1	4.1678	Forkhead box protein P4 (Fork head-related protein-like A)
GAK	O14976	1	1	6.1178	Cyclin-G-associated kinase (EC 2.7.11.1)
GANAB	Q14697	2	3	8.62338	Neutral alpha-glucosidase AB (EC 3.2.1.84) (Alpha-glucosidase 2) (Glucosidase II subunit alpha)
GAPDH	P04406	4	8	10.3842	Glyceraldehyde-3-phosphate dehydrogenase (GAPDH) (EC 1.2.1.12) (Peptidyl-cysteine S-nitrosylase GAPDH) (EC 2.6.99.-)
GARS	P41250	1	1	8.48613	Glycine--tRNA ligase (EC 6.1.1.14) (Diadenosine tetraphosphate synthetase) (AP-4-A synthetase) (Glycyl-tRNA synthetase) (GlyRS)
GBAS	O75323	1	1	13.294	Protein NipSnap homolog 2 (NipSnap2) (Glioblastoma-amplified sequence)
GBE1	Q04446	1	1	8.25667	1,4-alpha-glucan-branching enzyme (EC 2.4.1.18) (Brancher enzyme) (Glycogen-branching enzyme)
GCN1L1	Q92616	9	9	9.20025	Translational activator GCN1 (HsGCN1) (GCN1-like protein 1)
GDI2	P50395	2	2	14.339	Rab GDP dissociation inhibitor beta (Rab GDI beta) (Guanosine diphosphate dissociation inhibitor 2) (GDI-2)
GFPT1	Q06210	5	6	10.069	Glutamine--fructose-6-phosphate aminotransferase [isomerizing] 1 (EC 2.6.1.16) (D-fructose-6-phosphate amidotransferase 1) (Glutamine:fructose-6-phosphate amidotransferase 1) (GFAT 1) (GFAT1) (Hexosephosphate aminotransferase 1)
GGH	Q92820	1	1	3.27404	Gamma-glutamyl hydrolase (EC 3.4.19.9) (Conjugase) (GH) (Gamma-Glu-X carboxypeptidase)
GHITM	Q9H3K2	2	2	7.17767	Growth hormone-inducible transmembrane protein (Dermal papilla-derived protein 2) (Mitochondrial morphology and cristae structure 1) (MICS1) (Transmembrane BAX inhibitor motif-containing protein 5)
GLOD4	Q9HC38	1	1	12.1969	Glyoxalase domain-containing protein 4
GLS	O94925	2	2	8.21264	Glutaminase kidney isoform, mitochondrial (GLS) (EC 3.5.1.2) (K-glutaminase) (L-glutamine amidohydrolase)
GLUD1	P00367	5	7	10.2948	Glutamate dehydrogenase 1, mitochondrial (GDH 1) (EC 1.4.1.3)
GMPS	P49915	2	2	11.5525	GMP synthase [glutamine-hydrolyzing] (EC 6.3.5.2) (GMP synthetase) (Glutamine amidotransferase)
GNB2L1	P63244	4	4	7.20303	Guanine nucleotide-binding protein subunit beta-2-like 1 (Cell proliferation-inducing gene 21 protein) (Guanine nucleotide-binding protein subunit beta-like protein 12.3) (Human lung cancer oncogene 7 protein) (HLC-7) (Receptor for activated C kinase) (Receptor of activated protein kinase C 1) (RACK1) [Cleaved into: Guanine nucleotide-binding protein subunit beta-2-like 1, N-terminally processed]
GNB3	P16520	1	1	7.43082	Guanine nucleotide-binding protein G(I)/G(S)/G(T) subunit beta-3 (Transducin beta chain 3)
GNL3	Q9BVP2	1	1	7.43321	Guanine nucleotide-binding protein-like 3 (E2-induced gene 3 protein) (Novel nucleolar protein 47) (NNP47) (Nucleolar GTP-binding protein 3) (Nucleostemin)
GNL3L	Q9NVN8	1	1	4.12097	Guanine nucleotide-binding protein-like 3-like protein
GOLGA5	Q8TBA6	2	2	10.0909	Golgin subfamily A member 5 (Cell proliferation-inducing gene 31 protein) (Golgin-84) (Protein Ret-II) (RET-fused gene 5 protein)
GOT1	P17174	1	2	6.68222	Aspartate aminotransferase, cytoplasmic (cAspAT) (EC 2.6.1.1) (EC 2.6.1.3) (Cysteine aminotransferase, cytoplasmic) (Cysteine transaminase, cytoplasmic) (cCAT) (Glutamate oxaloacetate transaminase 1) (Transaminase A)
GOT2	P00505	3	4	15.675	Aspartate aminotransferase, mitochondrial (mAspAT) (EC 2.6.1.1) (EC 2.6.1.7) (Fatty acid-binding protein) (FABP-1) (Glutamate oxaloacetate transaminase 2) (Kynurenine aminotransferase 4) (Kynurenine aminotransferase IV) (Kynurenine--oxoglutarate transaminase 4) (Kynurenine--oxoglutarate transaminase IV) (Plasma membrane-associated fatty acid-binding protein) (FABPpm) (Transaminase A)
GPC3	P51654	5	7	3.35957	Glypican-3 (GTR2-2) (Intestinal protein OCI-5) (MXR7) [Cleaved into: Secreted glypican-3]
GPHN	Q9NQX3	1	1	8.16716	Gephyrin [Includes: Molybdopterin adenylyltransferase (MPT adenylyltransferase) (EC 2.7.7.75) (Domain G); Molybdopterin molybdenumtransferase (MPT Mo-transferase) (EC 2.10.1.1) (Domain E)]
GPT2	Q8TD30	1	1	6.39435	Alanine aminotransferase 2 (ALT2) (EC 2.6.1.2) (Glutamate pyruvate transaminase 2) (GPT 2) (Glutamic--alanine transaminase 2) (Glutamic--pyruvic transaminase 2)
GRB2	P62993	2	2	7.05996	Growth factor receptor-bound protein 2 (Adapter protein GRB2) (Protein Ash) (SH2/SH3 adapter GRB2)
GSR	P00390	2	2	10.1337	Glutathione reductase, mitochondrial (GR) (GRase) (EC 1.8.1.7)
GSTO1	P78417	2	2	8.41402	Glutathione S-transferase omega-1 (GSTO-1) (EC 2.5.1.18) (Glutathione S-transferase omega 1-1) (GSTO 1-1) (Glutathione-dependent dehydroascorbate reductase) (EC 1.8.5.1) (Monomethylarsonic acid reductase) (MMA(V) reductase) (EC 1.20.4.2) (S-(Phenacyl)glutathione reductase) (SPG-R)
GTPBP4	Q9BZE4	1	2	11.4816	Nucleolar GTP-binding protein 1 (Chronic renal failure gene protein) (GTP-binding protein NGB)
GYG1	P46976	1	1	1.75707	Glycogenin-1 (GN-1) (GN1) (EC 2.4.1.186)
H1F0	P07305	3	7	17.4377	Histone H1.0 (Histone H1') (Histone H1(0)) [Cleaved into: Histone H1.0, N-terminally processed]
H1FX	Q92522	2	2	5.76134	Histone H1x
H2AFY	O75367	4	5	8.77068	Core histone macro-H2A.1 (Histone macroH2A1) (mH2A1) (Histone H2A.y) (H2A/y) (Medulloblastoma antigen MU-MB-50.205)
H6PD	O95479	1	1	10.4484	GDH/6PGL endoplasmic bifunctional protein [Includes: Glucose 1-dehydrogenase (EC 1.1.1.47) (Hexose-6-phosphate dehydrogenase); 6-phosphogluconolactonase (6PGL) (EC 3.1.1.31)]
HADH	Q16836	1	1	11.1135	Hydroxyacyl-coenzyme A dehydrogenase, mitochondrial (HCDH) (EC 1.1.1.35) (Medium and short-chain L-3-hydroxyacyl-coenzyme A dehydrogenase) (Short-chain 3-hydroxyacyl-CoA dehydrogenase)
HADHA	P40939	8	10	14.6884	Trifunctional enzyme subunit alpha, mitochondrial (78 kDa gastrin-binding protein) (TP-alpha) [Includes: Long-chain enoyl-CoA hydratase (EC 4.2.1.17); Long chain 3-hydroxyacyl-CoA dehydrogenase (EC 1.1.1.211)]
HADHB	P55084	3	3	7.37155	Trifunctional enzyme subunit beta, mitochondrial (TP-beta) [Includes: 3-ketoacyl-CoA thiolase (EC 2.3.1.16) (Acetyl-CoA acyltransferase) (Beta-ketothiolase)]
HCFC1	P51610	2	2	12.3446	Host cell factor 1 (HCF) (HCF-1) (C1 factor) (CFF) (VCAF) (VP16 accessory protein) [Cleaved into: HCF N-terminal chain 1; HCF N-terminal chain 2; HCF N-terminal chain 3; HCF N-terminal chain 4; HCF N-terminal chain 5; HCF N-terminal chain 6; HCF C-terminal chain 1; HCF C-terminal chain 2; HCF C-terminal chain 3; HCF C-terminal chain 4; HCF C-terminal chain 5; HCF C-terminal chain 6]
HDGF	P51858	3	3	6.44968	Hepatoma-derived growth factor (HDGF) (High mobility group protein 1-like 2) (HMG-1L2)
HDLBP	Q00341	1	1	6.67322	Vigilin (High density lipoprotein-binding protein) (HDL-binding protein)
HGS	O14964	1	1	10.8034	Hepatocyte growth factor-regulated tyrosine kinase substrate (Hrs) (Protein pp110)
HIBADH	P31937	1	1	9.92053	3-hydroxyisobutyrate dehydrogenase, mitochondrial (HIBADH) (EC 1.1.1.31)
HIST1H1B	P16401	7	14	15.675	Histone H1.5 (Histone H1a) (Histone H1b) (Histone H1s-3)
HIST1H1C	P16403	2	5	9.68624	Histone H1.2 (Histone H1c) (Histone H1d) (Histone H1s-1)
HIST1H1D	P16402	3	12	14.097	Histone H1.3 (Histone H1c) (Histone H1s-2)
HIST1H1E	P10412	2	4	19.4322	Histone H1.4 (Histone H1b) (Histone H1s-4)
HIST1H3A	P68431	2	4	5.07391	Histone H3.1 (Histone H3/a) (Histone H3/b) (Histone H3/c) (Histone H3/d) (Histone H3/f) (Histone H3/h) (Histone H3/i) (Histone H3/j) (Histone H3/k) (Histone H3/l)
HIST2H2BC	Q6DN03	1	2	15.472	Putative histone H2B type 2-C (Histone H2B.t) (H2B/t)
HIST2H2BF	Q5QNW6	4	14	11.7204	Histone H2B type 2-F
HKDC1	Q2TB90	2	3	7.07726	Putative hexokinase HKDC1 (EC 2.7.1.1) (Hexokinase domain-containing protein 1)
HM13	Q8TCT9	3	4	8.1013	Minor histocompatibility antigen H13 (EC 3.4.23.-) (Intramembrane protease 1) (IMP-1) (IMPAS-1) (hIMP1) (Presenilin-like protein 3) (Signal peptide peptidase)
HMGB1	P09429	2	2	12.8432	High mobility group protein B1 (High mobility group protein 1) (HMG-1)
HMGB2	P26583	2	3	17.7913	High mobility group protein B2 (High mobility group protein 2) (HMG-2)
HMGCL	P35914	1	1	15.417	Hydroxymethylglutaryl-CoA lyase, mitochondrial (HL) (HMG-CoA lyase) (EC 4.1.3.4) (3-hydroxy-3-methylglutarate-CoA lyase)
HMGCLL1	Q8TB92	1	1	9.99491	3-hydroxymethyl-3-methylglutaryl-CoA lyase, cytoplasmic (EC 4.1.3.4) (3-hydroxymethyl-3-methylglutaryl-CoA lyase-like protein 1) (Endoplasmic reticulum 3-hydroxymethyl-3-methylglutaryl-CoA lyase) (er-cHL)
HMGCS1	Q01581	2	2	5.53942	Hydroxymethylglutaryl-CoA synthase, cytoplasmic (HMG-CoA synthase) (EC 2.3.3.10) (3-hydroxy-3-methylglutaryl coenzyme A synthase)
HMGN1	P05114	1	1	9.06193	Non-histone chromosomal protein HMG-14 (High mobility group nucleosome-binding domain-containing protein 1)
HMGN2	P05204	1	1	10.9919	Non-histone chromosomal protein HMG-17 (High mobility group nucleosome-binding domain-containing protein 2)
HNMT	P50135	1	1	5.77815	Histamine N-methyltransferase (HMT) (EC 2.1.1.8)
HNRNPA2B1	P22626	2	2	12.6141	Heterogeneous nuclear ribonucleoproteins A2/B1 (hnRNP A2/B1)
HNRNPA3	P51991	3	4	8.66542	Heterogeneous nuclear ribonucleoprotein A3 (hnRNP A3)
HNRNPAB	Q99729	2	2	9.57253	Heterogeneous nuclear ribonucleoprotein A/B (hnRNP A/B) (APOBEC1-binding protein 1) (ABBP-1)
HNRNPC	P07910	3	4	10.1769	Heterogeneous nuclear ribonucleoproteins C1/C2 (hnRNP C1/C2)
HNRNPD	Q14103	4	6	8.22141	Heterogeneous nuclear ribonucleoprotein D0 (hnRNP D0) (AU-rich element RNA-binding protein 1)
HNRNPDL	O14979	2	2	7.32946	Heterogeneous nuclear ribonucleoprotein D-like (hnRNP D-like) (hnRNP DL) (AU-rich element RNA-binding factor) (JKT41-binding protein) (Protein laAUF1)
HNRNPK	P61978	2	2	7.4757	Heterogeneous nuclear ribonucleoprotein K (hnRNP K) (Transformation up-regulated nuclear protein) (TUNP)
HNRNPM	P52272	1	2	9.60437	Heterogeneous nuclear ribonucleoprotein M (hnRNP M)
HNRNPR	O43390	2	2	17.0348	Heterogeneous nuclear ribonucleoprotein R (hnRNP R)
HNRNPU	Q00839	7	10	10.3548	Heterogeneous nuclear ribonucleoprotein U (hnRNP U) (Scaffold attachment factor A) (SAF-A) (p120) (pp120)
HNRNPUL2	Q1KMD3	3	5	10.3671	Heterogeneous nuclear ribonucleoprotein U-like protein 2 (Scaffold-attachment factor A2) (SAF-A2)
HP1BP3	Q5SSJ5	4	6	12.7628	Heterochromatin protein 1-binding protein 3 (Protein HP1-BP74)
HPD	P32754	1	1	7.79781	4-hydroxyphenylpyruvate dioxygenase (EC 1.13.11.27) (4-hydroxyphenylpyruvic acid oxidase) (4HPPD) (HPD) (HPPDase)
HSD17B4	P51659	3	3	8.33611	Peroxisomal multifunctional enzyme type 2 (MFE-2) (17-beta-hydroxysteroid dehydrogenase 4) (17-beta-HSD 4) (D-bifunctional protein) (DBP) (Multifunctional protein 2) (MPF-2) [Cleaved into: (3R)-hydroxyacyl-CoA dehydrogenase (EC 1.1.1.n12); Enoyl-CoA hydratase 2 (EC 4.2.1.107) (EC 4.2.1.119) (3-alpha,7-alpha,12-alpha-trihydroxy-5-beta-cholest-24-enoyl-CoA hydratase)]
HSDL2	Q6YN16	1	1	10.7199	Hydroxysteroid dehydrogenase-like protein 2 (EC 1.-.-.-)
HSP90AA1	P07900	4	7	6.78226	Heat shock protein HSP 90-alpha (Heat shock 86 kDa) (HSP 86) (HSP86) (Renal carcinoma antigen NY-REN-38)
HSP90AB1	P08238	5	7	7.82687	Heat shock protein HSP 90-beta (HSP 90) (Heat shock 84 kDa) (HSP 84) (HSP84)
HSP90B1	P14625	9	12	9.52518	Endoplasmin (94 kDa glucose-regulated protein) (GRP-94) (Heat shock protein 90 kDa beta member 1) (Tumor rejection antigen 1) (gp96 homolog)
HSPA4	P34932	2	2	10.3132	Heat shock 70 kDa protein 4 (HSP70RY) (Heat shock 70-related protein APG-2)
HSPA8	P11142	3	5	7.01353	Heat shock cognate 71 kDa protein (Heat shock 70 kDa protein 8)
HSPA9	P38646	2	2	7.50322	Stress-70 protein, mitochondrial (75 kDa glucose-regulated protein) (GRP-75) (Heat shock 70 kDa protein 9) (Mortalin) (MOT) (Peptide-binding protein 74) (PBP74)
HSPD1	P10809	5	8	8.63842	60 kDa heat shock protein, mitochondrial (60 kDa chaperonin) (Chaperonin 60) (CPN60) (Heat shock protein 60) (HSP-60) (Hsp60) (HuCHA60) (Mitochondrial matrix protein P1) (P60 lymphocyte protein)
HSPE1	P61604	3	4	11.0992	10 kDa heat shock protein, mitochondrial (Hsp10) (10 kDa chaperonin) (Chaperonin 10) (CPN10) (Early-pregnancy factor) (EPF)
HUWE1	Q7Z6Z7	2	2	7.70849	E3 ubiquitin-protein ligase HUWE1 (EC 6.3.2.-) (ARF-binding protein 1) (ARF-BP1) (HECT, UBA and WWE domain-containing protein 1) (Homologous to E6AP carboxyl terminus homologous protein 9) (HectH9) (Large structure of UREB1) (LASU1) (Mcl-1 ubiquitin ligase E3) (Mule) (Upstream regulatory element-binding protein 1) (URE-B1) (URE-binding protein 1)
HYOU1	Q9Y4L1	3	4	4.98237	Hypoxia up-regulated protein 1 (150 kDa oxygen-regulated protein) (ORP-150) (170 kDa glucose-regulated protein) (GRP-170)
IARS	P41252	2	4	10.1086	Isoleucine--tRNA ligase, cytoplasmic (EC 6.1.1.5) (Isoleucyl-tRNA synthetase) (IRS) (IleRS)
IARS2	Q9NSE4	2	2	15.0064	Isoleucine--tRNA ligase, mitochondrial (EC 6.1.1.5) (Isoleucyl-tRNA synthetase) (IleRS)
IDH1	O75874	5	6	8.85585	Isocitrate dehydrogenase [NADP] cytoplasmic (IDH) (EC 1.1.1.42) (Cytosolic NADP-isocitrate dehydrogenase) (IDP) (NADP(+)-specific ICDH) (Oxalosuccinate decarboxylase)
IDH2	P48735	1	1	16.8896	Isocitrate dehydrogenase [NADP], mitochondrial (IDH) (EC 1.1.1.42) (ICD-M) (IDP) (NADP(+)-specific ICDH) (Oxalosuccinate decarboxylase)
IDH3B	O43837	1	2	3.38765	Isocitrate dehydrogenase [NAD] subunit beta, mitochondrial (EC 1.1.1.41) (Isocitric dehydrogenase subunit beta) (NAD(+)-specific ICDH subunit beta)
IDI1	Q13907	2	2	6.92109	Isopentenyl-diphosphate Delta-isomerase 1 (EC 5.3.3.2) (Isopentenyl pyrophosphate isomerase 1) (IPP isomerase 1) (IPPI1)
IFITM3	Q01628	1	1	5.6904	Interferon-induced transmembrane protein 3 (Dispanin subfamily A member 2b) (DSPA2b) (Interferon-inducible protein 1-8U)
IGF2BP1	Q9NZI8	4	5	10.4579	Insulin-like growth factor 2 mRNA-binding protein 1 (IGF2 mRNA-binding protein 1) (IMP-1) (IMP1) (Coding region determinant-binding protein) (CRD-BP) (IGF-II mRNA-binding protein 1) (VICKZ family member 1) (Zipcode-binding protein 1) (ZBP-1)
IGFBP1	P08833	1	1	0.323757	Insulin-like growth factor-binding protein 1 (IBP-1) (IGF-binding protein 1) (IGFBP-1) (Placental protein 12) (PP12)
ILF2	Q12905	2	3	9.78745	Interleukin enhancer-binding factor 2 (Nuclear factor of activated T-cells 45 kDa)
ILF3	Q12906	2	3	10.8152	Interleukin enhancer-binding factor 3 (Double-stranded RNA-binding protein 76) (DRBP76) (M-phase phosphoprotein 4) (MPP4) (Nuclear factor associated with dsRNA) (NFAR) (Nuclear factor of activated T-cells 90 kDa) (NF-AT-90) (Translational control protein 80) (TCP80)
IMMT	Q16891	1	1	5.81158	Mitochondrial inner membrane protein (Cell proliferation-inducing gene 4/52 protein) (Mitofilin) (p87/89)
IMPDH2	P12268	1	1	5.58134	Inosine-5'-monophosphate dehydrogenase 2 (IMP dehydrogenase 2) (IMPD 2) (IMPDH 2) (EC 1.1.1.205) (IMPDH-II)
IQGAP1	P46940	3	3	10.926	Ras GTPase-activating-like protein IQGAP1 (p195)
IQGAP2	Q13576	2	2	10.8457	Ras GTPase-activating-like protein IQGAP2
IST1	P53990	1	1	5.58809	IST1 homolog (hIST1) (Putative MAPK-activating protein PM28)
ITPR2	Q14571	2	3	10.6393	Inositol 1,4,5-trisphosphate receptor type 2 (IP3 receptor isoform 2) (IP3R 2) (InsP3R2) (Type 2 inositol 1,4,5-trisphosphate receptor) (Type 2 InsP3 receptor)
IVD	P26440	1	1	10.7033	Isovaleryl-CoA dehydrogenase, mitochondrial (IVD) (EC 1.3.8.4)
JUP	P14923	3	3	6.86352	Junction plakoglobin (Catenin gamma) (Desmoplakin III) (Desmoplakin-3)
KDM3A	Q9Y4C1	2	2	5.06724	Lysine-specific demethylase 3A (EC 1.14.11.-) (JmjC domain-containing histone demethylation protein 2A) (Jumonji domain-containing protein 1A)
KDM4C	Q9H3R0	1	1	6.2021	Lysine-specific demethylase 4C (EC 1.14.11.-) (Gene amplified in squamous cell carcinoma 1 protein) (GASC-1 protein) (JmjC domain-containing histone demethylation protein 3C) (Jumonji domain-containing protein 2C)
KEAP1	Q14145	1	1	3.76506	Kelch-like ECH-associated protein 1 (Cytosolic inhibitor of Nrf2) (INrf2) (Kelch-like protein 19)
KHDRBS1	Q07666	1	1	10.1694	KH domain-containing, RNA-binding, signal transduction-associated protein 1 (GAP-associated tyrosine phosphoprotein p62) (Src-associated in mitosis 68 kDa protein) (Sam68) (p21 Ras GTPase-activating protein-associated p62) (p68)
KHSRP	Q92945	1	1	9.32778	Far upstream element-binding protein 2 (FUSE-binding protein 2) (KH type-splicing regulatory protein) (KSRP) (p75)
KIAA1217	Q5T5P2	1	2	7.80044	Sickle tail protein homolog
KIF20B	Q96Q89	1	1	5.70867	Kinesin-like protein KIF20B (Cancer/testis antigen 90) (CT90) (Kinesin-related motor interacting with PIN1) (M-phase phosphoprotein 1) (MPP1)
KIF2C	Q99661	3	3	8.16716	Kinesin-like protein KIF2C (Kinesin-like protein 6) (Mitotic centromere-associated kinesin) (MCAK)
KIF4A	O95239	1	1	8.16332	Chromosome-associated kinesin KIF4A (Chromokinesin-A)
KPNB1	Q14974	2	2	8.38958	Importin subunit beta-1 (Importin-90) (Karyopherin subunit beta-1) (Nuclear factor p97) (Pore targeting complex 97 kDa subunit) (PTAC97)
KRT18	P05783	2	3	5.2912	Keratin, type I cytoskeletal 18 (Cell proliferation-inducing gene 46 protein) (Cytokeratin-18) (CK-18) (Keratin-18) (K18)
KRT6C	P48668	1	1	8.03276	Keratin, type II cytoskeletal 6C (Cytokeratin-6C) (CK-6C) (Cytokeratin-6E) (CK-6E) (Keratin K6h) (Keratin-6C) (K6C) (Type-II keratin Kb12)
KRT8	P05787	7	8	7.48135	Keratin, type II cytoskeletal 8 (Cytokeratin-8) (CK-8) (Keratin-8) (K8) (Type-II keratin Kb8)
KTN1	Q86UP2	1	1	9.7202	Kinectin (CG-1 antigen) (Kinesin receptor)
LAP3	P28838	2	2	11.4305	Cytosol aminopeptidase (EC 3.4.11.1) (Leucine aminopeptidase 3) (LAP-3) (Leucyl aminopeptidase) (Peptidase S) (Proline aminopeptidase) (EC 3.4.11.5) (Prolyl aminopeptidase)
LARP1	Q6PKG0	2	2	6.93147	La-related protein 1 (La ribonucleoprotein domain family member 1)
LARP4	Q71RC2	3	3	6.56203	La-related protein 4 (La ribonucleoprotein domain family member 4)
LASP1	Q14847	4	4	9.48477	LIM and SH3 domain protein 1 (LASP-1) (Metastatic lymph node gene 50 protein) (MLN 50)
LDHA	P00338	8	14	9.83048	L-lactate dehydrogenase A chain (LDH-A) (EC 1.1.1.27) (Cell proliferation-inducing gene 19 protein) (LDH muscle subunit) (LDH-M) (Renal carcinoma antigen NY-REN-59)
LENG8	Q96PV6	1	5	13.509	Leukocyte receptor cluster member 8
LETM1	O95202	1	1	13.0733	LETM1 and EF-hand domain-containing protein 1, mitochondrial (Leucine zipper-EF-hand-containing transmembrane protein 1)
LIG1	P18858	2	2	6.7185	DNA ligase 1 (EC 6.5.1.1) (DNA ligase I) (Polydeoxyribonucleotide synthase [ATP] 1)
LRPPRC	P42704	5	6	7.34188	Leucine-rich PPR motif-containing protein, mitochondrial (130 kDa leucine-rich protein) (LRP 130) (GP130)
LSS	P48449	1	1	4.38396	Lanosterol synthase (EC 5.4.99.7) (2,3-epoxysqualene--lanosterol cyclase) (Oxidosqualene--lanosterol cyclase) (OSC) (hOSC)
LYPLA1	O75608	1	1	5.54562	Acyl-protein thioesterase 1 (APT-1) (hAPT1) (EC 3.1.2.-) (Lysophospholipase 1) (Lysophospholipase I) (LPL-I) (LysoPLA I)
LYPLAL1	Q5VWZ2	1	1	13.1178	Lysophospholipase-like protein 1 (EC 3.1.2.-)
MAGED1	Q9Y5V3	1	3	1.67995	Melanoma-associated antigen D1 (MAGE tumor antigen CCF) (MAGE-D1 antigen) (Neurotrophin receptor-interacting MAGE homolog)
MAGED2	Q9UNF1	3	3	5.442	Melanoma-associated antigen D2 (11B6) (Breast cancer-associated gene 1 protein) (BCG-1) (Hepatocellular carcinoma-associated protein JCL-1) (MAGE-D2 antigen)
MALT1	Q9UDY8	1	1	6.93563	Mucosa-associated lymphoid tissue lymphoma translocation protein 1 (EC 3.4.22.-) (MALT lymphoma-associated translocation) (Paracaspase)
MAN1A1	P33908	2	2	2.45041	Mannosyl-oligosaccharide 1,2-alpha-mannosidase IA (EC 3.2.1.113) (Man(9)-alpha-mannosidase) (Man9-mannosidase) (Mannosidase alpha class 1A member 1) (Processing alpha-1,2-mannosidase IA) (Alpha-1,2-mannosidase IA)
MAP4	P27816	3	3	8.71664	Microtubule-associated protein 4 (MAP-4)
MAT1A	Q00266	2	3	9.75714	S-adenosylmethionine synthase isoform type-1 (AdoMet synthase 1) (EC 2.5.1.6) (Methionine adenosyltransferase 1) (MAT 1) (Methionine adenosyltransferase I/III) (MAT-I/III)
MAT2A	P31153	1	1	8.79294	S-adenosylmethionine synthase isoform type-2 (AdoMet synthase 2) (EC 2.5.1.6) (Methionine adenosyltransferase 2) (MAT 2) (Methionine adenosyltransferase II) (MAT-II)
MATR3	P43243	1	1	7.81892	Matrin-3
MCM3	P25205	3	4	4.04899	DNA replication licensing factor MCM3 (EC 3.6.4.12) (DNA polymerase alpha holoenzyme-associated protein P1) (P1-MCM3) (RLF subunit beta) (p102)
MCTS1	Q9ULC4	1	1	11.1654	Malignant T-cell-amplified sequence 1 (MCT-1) (Multiple copies T-cell malignancies)
MDH1	P40925	2	2	9.06312	Malate dehydrogenase, cytoplasmic (EC 1.1.1.37) (Cytosolic malate dehydrogenase) (Diiodophenylpyruvate reductase) (EC 1.1.1.96)
MESDC2	Q14696	1	2	9.26543	LDLR chaperone MESD (Mesoderm development candidate 2) (Mesoderm development protein) (Renal carcinoma antigen NY-REN-61)
METAP2	P50579	2	2	5.26548	Methionine aminopeptidase 2 (MAP 2) (MetAP 2) (EC 3.4.11.18) (Initiation factor 2-associated 67 kDa glycoprotein) (p67) (p67eIF2) (Peptidase M)
MIA3	Q5JRA6	1	1	6.4865	Melanoma inhibitory activity protein 3 (C219-reactive peptide) (D320) (Transport and Golgi organization protein 1)
MICU1	Q9BPX6	1	2	5.46301	Calcium uptake protein 1, mitochondrial (Atopy-related autoantigen CALC) (ara CALC) (Calcium-binding atopy-related autoantigen 1) (allergen Hom s 4)
MINK1	Q8N4C8	1	1	8.0777	Misshapen-like kinase 1 (EC 2.7.11.1) (GCK family kinase MiNK) (MAPK/ERK kinase kinase kinase 6) (MEK kinase kinase 6) (MEKKK 6) (Misshapen/NIK-related kinase) (Mitogen-activated protein kinase kinase kinase kinase 6)
MKI67	P46013	17	21	7.74207	Antigen KI-67
MORF4L1	Q9UBU8	1	2	1.83106	Mortality factor 4-like protein 1 (MORF-related gene 15 protein) (Protein MSL3-1) (Transcription factor-like protein MRG15)
MOV10	Q9HCE1	2	2	15.3013	Putative helicase MOV-10 (EC 3.6.4.13) (Moloney leukemia virus 10 protein)
MRPS18B	Q9Y676	1	1	3.88535	28S ribosomal protein S18b, mitochondrial (MRP-S18-b) (Mrps18-b) (S18mt-b) (28S ribosomal protein S18-2, mitochondrial) (MRP-S18-2)
MRPS27	Q92552	1	1	5.91271	28S ribosomal protein S27, mitochondrial (MRP-S27) (S27mt)
MRPS5	P82675	1	1	13.0585	28S ribosomal protein S5, mitochondrial (MRP-S5) (S5mt)
MRTO4	Q9UKD2	1	1	9.82351	mRNA turnover protein 4 homolog
MSH6	P52701	1	2	6.46774	DNA mismatch repair protein Msh6 (hMSH6) (G/T mismatch-binding protein) (GTBP) (GTMBP) (MutS-alpha 160 kDa subunit) (p160)
MTCH1	Q9NZJ7	1	1	17.9432	Mitochondrial carrier homolog 1 (Presenilin-associated protein)
MTCH2	Q9Y6C9	1	2	36.7133	Mitochondrial carrier homolog 2 (Met-induced mitochondrial protein)
MTHFD1L	Q6UB35	2	3	8.97162	Monofunctional C1-tetrahydrofolate synthase, mitochondrial (EC 6.3.4.3) (Formyltetrahydrofolate synthetase)
MTPN	P58546	1	2	13.4592	Myotrophin (Protein V-1)
MTTP	P55157	5	5	10.7199	Microsomal triglyceride transfer protein large subunit
MVP	Q14764	1	1	4.30393	Major vault protein (MVP) (Lung resistance-related protein)
MYH10	P35580	4	4	12.6857	Myosin-10 (Cellular myosin heavy chain, type B) (Myosin heavy chain 10) (Myosin heavy chain, non-muscle IIb) (Non-muscle myosin heavy chain B) (NMMHC-B) (Non-muscle myosin heavy chain IIb) (NMMHC II-b) (NMMHC-IIB)
MYH11	P35749	1	2	6.95652	Myosin-11 (Myosin heavy chain 11) (Myosin heavy chain, smooth muscle isoform) (SMMHC)
MYH9	P35579	10	10	6.72045	Myosin-9 (Cellular myosin heavy chain, type A) (Myosin heavy chain 9) (Myosin heavy chain, non-muscle IIa) (Non-muscle myosin heavy chain A) (NMMHC-A) (Non-muscle myosin heavy chain IIa) (NMMHC II-a) (NMMHC-IIA)
MYO15B	Q96JP2	1	1	8.60839	Unconventional myosin-XVB (Myosin XVBP) (Unconventional myosin-15B)
MYO5C	Q9NQX4	1	2	11.3649	Unconventional myosin-Vc
NAA50	Q9GZZ1	1	1	5.86221	N-alpha-acetyltransferase 50 (EC 2.3.1.-) (N-acetyltransferase 13) (N-acetyltransferase 5) (hNAT5) (N-acetyltransferase san homolog) (hSAN) (NatE catalytic subunit)
NACA	Q13765	2	2	7.32404	Nascent polypeptide-associated complex subunit alpha (NAC-alpha) (Alpha-NAC) (allergen Hom s 2)
NAPB	Q9H115	2	2	9.23334	Beta-soluble NSF attachment protein (SNAP-beta) (N-ethylmaleimide-sensitive factor attachment protein beta)
NARS	O43776	1	1	9.45631	Asparagine--tRNA ligase, cytoplasmic (EC 6.1.1.22) (Asparaginyl-tRNA synthetase) (AsnRS)
NCAPG	Q9BPX3	2	2	3.98521	Condensin complex subunit 3 (Chromosome-associated protein G) (Condensin subunit CAP-G) (hCAP-G) (Melanoma antigen NY-MEL-3) (Non-SMC condensin I complex subunit G) (XCAP-G homolog)
NCL	P19338	12	15	7.68115	Nucleolin (Protein C23)
NDUFA4	O00483	2	2	7.28708	NADH dehydrogenase [ubiquinone] 1 alpha subcomplex subunit 4 (Complex I-MLRQ) (CI-MLRQ) (NADH-ubiquinone oxidoreductase MLRQ subunit)
NDUFS2	O75306	1	2	7.36294	NADH dehydrogenase [ubiquinone] iron-sulfur protein 2, mitochondrial (EC 1.6.5.3) (EC 1.6.99.3) (Complex I-49kD) (CI-49kD) (NADH-ubiquinone oxidoreductase 49 kDa subunit)
NELFB	Q8WX92	1	2	7.68456	Negative elongation factor B (NELF-B) (Cofactor of BRCA1)
NGEF	Q8N5V2	1	1	6.9398	Ephexin-1 (Eph-interacting exchange protein) (Neuronal guanine nucleotide exchange factor)
NNT	Q13423	2	2	9.38969	NAD(P) transhydrogenase, mitochondrial (EC 1.6.1.2) (Nicotinamide nucleotide transhydrogenase) (Pyridine nucleotide transhydrogenase)
NOL7	Q9UMY1	1	2	5.83359	Nucleolar protein 7 (Nucleolar protein of 27 kDa)
NOL9	Q5SY16	1	2	7.25353	Polynucleotide 5'-hydroxyl-kinase NOL9 (EC 2.7.1.-) (Nucleolar protein 9)
NOLC1	Q14978	2	3	6.40143	Nucleolar and coiled-body phosphoprotein 1 (140 kDa nucleolar phosphoprotein) (Nopp140) (Hepatitis C virus NS5A-transactivated protein 13) (HCV NS5A-transactivated protein 13) (Nucleolar 130 kDa protein) (Nucleolar phosphoprotein p130)
NOP2	P46087	2	4	15.1111	Putative ribosomal RNA methyltransferase NOP2 (EC 2.1.1.-) (Nucleolar protein 1) (Nucleolar protein 2 homolog) (Proliferating-cell nucleolar antigen p120) (Proliferation-associated nucleolar protein p120)
NOP56	O00567	2	2	14.4919	Nucleolar protein 56 (Nucleolar protein 5A)
NOP58	Q9Y2X3	3	3	10.4186	Nucleolar protein 58 (Nucleolar protein 5)
NPM1	P06748	5	5	7.56133	Nucleophosmin (NPM) (Nucleolar phosphoprotein B23) (Nucleolar protein NO38) (Numatrin)
NQO1	P15559	4	5	9.65924	NAD(P)H dehydrogenase [quinone] 1 (EC 1.6.5.2) (Azoreductase) (DT-diaphorase) (DTD) (Menadione reductase) (NAD(P)H:quinone oxidoreductase 1) (Phylloquinone reductase) (Quinone reductase 1) (QR1)
NRAS	P01111	1	1	11.0744	GTPase NRas (Transforming protein N-Ras)
NSF	P46459	1	1	18.2888	Vesicle-fusing ATPase (EC 3.6.4.6) (N-ethylmaleimide-sensitive fusion protein) (NEM-sensitive fusion protein) (Vesicular-fusion protein NSF)
NSUN5	Q96P11	1	1	6.28819	Putative methyltransferase NSUN5 (EC 2.1.1.-) (NOL1-related protein) (NOL1R) (NOL1/NOP2/Sun domain family member 5) (Williams-Beuren syndrome chromosomal region 20A protein)
NUDC	Q9Y266	2	4	5.47986	Nuclear migration protein nudC (Nuclear distribution protein C homolog)
NUMA1	Q14980	2	2	9.95329	Nuclear mitotic apparatus protein 1 (NuMA protein) (SP-H antigen)
NUP98	P52948	1	1	10.2994	Nuclear pore complex protein Nup98-Nup96 [Cleaved into: Nuclear pore complex protein Nup98 (98 kDa nucleoporin) (Nucleoporin Nup98) (Nup98); Nuclear pore complex protein Nup96 (96 kDa nucleoporin) (Nucleoporin Nup96) (Nup96)]
NUSAP1	Q9BXS6	2	2	5.82917	Nucleolar and spindle-associated protein 1 (NuSAP)
OAT	P04181	2	2	7.11796	Ornithine aminotransferase, mitochondrial (EC 2.6.1.13) (Ornithine delta-aminotransferase) (Ornithine--oxo-acid aminotransferase) [Cleaved into: Ornithine aminotransferase, hepatic form; Ornithine aminotransferase, renal form]
OGDH	Q02218	2	2	6.89424	2-oxoglutarate dehydrogenase, mitochondrial (EC 1.2.4.2) (2-oxoglutarate dehydrogenase complex component E1) (OGDC-E1) (Alpha-ketoglutarate dehydrogenase)
OLA1	Q9NTK5	3	3	9.28281	Obg-like ATPase 1 (DNA damage-regulated overexpressed in cancer 45) (DOC45) (GTP-binding protein 9)
OMA1	Q96E52	1	1	9.28903	Metalloendopeptidase OMA1, mitochondrial (EC 3.4.24.-) (Metalloprotease-related protein 1) (MPRP-1) (Overlapping with the m-AAA protease 1 homolog)
P4HA1	P13674	1	2	7.25581	Prolyl 4-hydroxylase subunit alpha-1 (4-PH alpha-1) (EC 1.14.11.2) (Procollagen-proline,2-oxoglutarate-4-dioxygenase subunit alpha-1)
PABPC1	P11940	2	2	12.0067	Polyadenylate-binding protein 1 (PABP-1) (Poly(A)-binding protein 1)
PABPC4	Q13310	4	4	11.9529	Polyadenylate-binding protein 4 (PABP-4) (Poly(A)-binding protein 4) (Activated-platelet protein 1) (APP-1) (Inducible poly(A)-binding protein) (iPABP)
PACS1	Q6VY07	1	1	7.72998	Phosphofurin acidic cluster sorting protein 1 (PACS-1)
PACSIN2	Q9UNF0	1	1	9.89362	Protein kinase C and casein kinase substrate in neurons protein 2 (Syndapin-2) (Syndapin-II)
PAFAH1B1	P43034	1	1	14.8426	Platelet-activating factor acetylhydrolase IB subunit alpha (Lissencephaly-1 protein) (LIS-1) (PAF acetylhydrolase 45 kDa subunit) (PAF-AH 45 kDa subunit) (PAF-AH alpha) (PAFAH alpha)
PAICS	P22234	1	1	7.76114	Multifunctional protein ADE2 [Includes: Phosphoribosylaminoimidazole-succinocarboxamide synthase (EC 6.3.2.6) (SAICAR synthetase); Phosphoribosylaminoimidazole carboxylase (EC 4.1.1.21) (AIR carboxylase) (AIRC)]
PAPOLA	P51003	1	2	21.2361	Poly(A) polymerase alpha (PAP-alpha) (EC 2.7.7.19) (Polynucleotide adenylyltransferase alpha)
PAPSS1	O43252	1	1	6.25189	Bifunctional 3'-phosphoadenosine 5'-phosphosulfate synthase 1 (PAPS synthase 1) (PAPSS 1) (Sulfurylase kinase 1) (SK 1) (SK1) [Includes: Sulfate adenylyltransferase (EC 2.7.7.4) (ATP-sulfurylase) (Sulfate adenylate transferase) (SAT); Adenylyl-sulfate kinase (EC 2.7.1.25) (3'-phosphoadenosine-5'-phosphosulfate synthase) (APS kinase) (Adenosine-5'-phosphosulfate 3'-phosphotransferase) (Adenylylsul…
PARK7	Q99497	2	2	9.28281	Protein DJ-1 (EC 3.4.-.-) (Oncogene DJ1) (Parkinson disease protein 7)
PARP1	P09874	8	9	12.2638	Poly [ADP-ribose] polymerase 1 (PARP-1) (EC 2.4.2.30) (ADP-ribosyltransferase diphtheria toxin-like 1) (ARTD1) (NAD(+) ADP-ribosyltransferase 1) (ADPRT 1) (Poly[ADP-ribose] synthase 1)
PCBP4	P57723	1	1	9.31149	Poly(rC)-binding protein 4 (Alpha-CP4)
PCID2	Q5JVF3	1	1	12.1926	PCI domain-containing protein 2 (CSN12-like protein)
PCK1	P35558	1	1	3.76731	Phosphoenolpyruvate carboxykinase, cytosolic [GTP] (PEPCK-C) (EC 4.1.1.32) (Phosphoenolpyruvate carboxylase)
PCYOX1	Q9UHG3	2	2	7.29168	Prenylcysteine oxidase 1 (EC 1.8.3.5) (Prenylcysteine lyase)
PDE12	Q6L8Q7	1	1	8.49237	2',5'-phosphodiesterase 12 (2'-PDE) (2-PDE) (EC 3.1.4.-) (Mitochondrial deadenylase) (EC 3.1.13.4)
PDIA3	P30101	5	6	9.69708	Protein disulfide-isomerase A3 (EC 5.3.4.1) (58 kDa glucose-regulated protein) (58 kDa microsomal protein) (p58) (Disulfide isomerase ER-60) (Endoplasmic reticulum resident protein 57) (ER protein 57) (ERp57) (Endoplasmic reticulum resident protein 60) (ER protein 60) (ERp60)
PDIA4	P13667	2	2	10.3378	Protein disulfide-isomerase A4 (EC 5.3.4.1) (Endoplasmic reticulum resident protein 70) (ER protein 70) (ERp70) (Endoplasmic reticulum resident protein 72) (ER protein 72) (ERp-72) (ERp72)
PDIA5	Q14554	3	3	15.2474	Protein disulfide-isomerase A5 (EC 5.3.4.1) (Protein disulfide isomerase-related protein)
PDLIM5	Q96HC4	2	2	7.01779	PDZ and LIM domain protein 5 (Enigma homolog) (Enigma-like PDZ and LIM domains protein)
PDXDC1	Q6P996	1	1	7.81275	Pyridoxal-dependent decarboxylase domain-containing protein 1 (EC 4.1.1.-)
PEBP1	P30086	3	6	11.9488	Phosphatidylethanolamine-binding protein 1 (PEBP-1) (HCNPpp) (Neuropolypeptide h3) (Prostatic-binding protein) (Raf kinase inhibitor protein) (RKIP) [Cleaved into: Hippocampal cholinergic neurostimulating peptide (HCNP)]
PECR	Q9BY49	2	2	14.2887	Peroxisomal trans-2-enoyl-CoA reductase (TERP) (EC 1.3.1.38) (2,4-dienoyl-CoA reductase-related protein) (DCR-RP) (HPDHase) (pVI-ARL)
PEG10	Q86TG7	1	1	5.80574	Retrotransposon-derived protein PEG10 (Embryonal carcinoma differentiation-regulated protein) (Mammalian retrotransposon-derived protein 2) (Myelin expression factor 3-like protein 1) (MEF3-like protein 1) (Paternally expressed gene 10 protein) (Retrotransposon gag domain-containing protein 3) (Retrotransposon-derived gag-like polyprotein) (Ty3/Gypsy-like protein)
PEG3	Q9GZU2	5	5	2.85952	Paternally-expressed gene 3 protein (Zinc finger and SCAN domain-containing protein 24)
PFAS	O15067	1	1	6.93217	Phosphoribosylformylglycinamidine synthase (FGAM synthase) (FGAMS) (EC 6.3.5.3) (Formylglycinamide ribotide amidotransferase) (FGARAT) (Formylglycinamide ribotide synthetase)
PFKL	P17858	1	2	5.40045	6-phosphofructokinase, liver type (EC 2.7.1.11) (Phosphofructo-1-kinase isozyme B) (PFK-B) (Phosphofructokinase 1) (Phosphohexokinase)
PFN1	P07737	3	5	10.9467	Profilin-1 (Epididymis tissue protein Li 184a) (Profilin I)
PGAM1	P18669	1	1	9.89362	Phosphoglycerate mutase 1 (EC 3.1.3.13) (EC 5.4.2.11) (EC 5.4.2.4) (BPG-dependent PGAM 1) (Phosphoglycerate mutase isozyme B) (PGAM-B)
PGAM4	Q8N0Y7	2	3	9.33909	Probable phosphoglycerate mutase 4 (EC 3.1.3.13) (EC 5.4.2.11) (EC 5.4.2.4)
PGD	P52209	6	7	10.066	6-phosphogluconate dehydrogenase, decarboxylating (EC 1.1.1.44)
PGK1	P00558	1	1	8.27638	Phosphoglycerate kinase 1 (EC 2.7.2.3) (Cell migration-inducing gene 10 protein) (Primer recognition protein 2) (PRP 2)
PGM1	P36871	1	1	7.98281	Phosphoglucomutase-1 (PGM 1) (EC 5.4.2.2) (Glucose phosphomutase 1)
PGM3	O95394	2	3	10.243	Phosphoacetylglucosamine mutase (PAGM) (EC 5.4.2.3) (Acetylglucosamine phosphomutase) (N-acetylglucosamine-phosphate mutase) (Phosphoglucomutase-3) (PGM 3)
PHB2	Q99623	1	1	12.6325	Prohibitin-2 (B-cell receptor-associated protein BAP37) (D-prohibitin) (Repressor of estrogen receptor activity)
PHGDH	O43175	2	4	8.89106	D-3-phosphoglycerate dehydrogenase (3-PGDH) (EC 1.1.1.95)
PHYH	O14832	1	1	2.45501	Phytanoyl-CoA dioxygenase, peroxisomal (EC 1.14.11.18) (Phytanic acid oxidase) (Phytanoyl-CoA alpha-hydroxylase) (PhyH)
PICALM	Q13492	1	1	11.178	Phosphatidylinositol-binding clathrin assembly protein (Clathrin assembly lymphoid myeloid leukemia protein)
PIN4	Q9Y237	1	1	7.73688	Peptidyl-prolyl cis-trans isomerase NIMA-interacting 4 (EC 5.2.1.8) (Parvulin-14) (Par14) (hPar14) (Parvulin-17) (Par17) (hPar17) (Peptidyl-prolyl cis-trans isomerase Pin4) (PPIase Pin4) (Peptidyl-prolyl cis/trans isomerase EPVH) (hEPVH) (Rotamase Pin4)
PKLR	P30613	1	2	10.2871	Pyruvate kinase PKLR (EC 2.7.1.40) (Pyruvate kinase 1) (Pyruvate kinase isozymes L/R) (R-type/L-type pyruvate kinase) (Red cell/liver pyruvate kinase)
PKM	P14618	7	8	10.5502	Pyruvate kinase PKM (EC 2.7.1.40) (Cytosolic thyroid hormone-binding protein) (CTHBP) (Opa-interacting protein 3) (OIP-3) (Pyruvate kinase 2/3) (Pyruvate kinase muscle isozyme) (Thyroid hormone-binding protein 1) (THBP1) (Tumor M2-PK) (p58)
PLIN2	Q99541	4	6	4.08599	Perilipin-2 (Adipophilin) (Adipose differentiation-related protein) (ADRP)
PLK1	P53350	1	1	8.2754	Serine/threonine-protein kinase PLK1 (EC 2.7.11.21) (Polo-like kinase 1) (PLK-1) (Serine/threonine-protein kinase 13) (STPK13)
PLOD1	Q02809	2	3	5.43176	Procollagen-lysine,2-oxoglutarate 5-dioxygenase 1 (EC 1.14.11.4) (Lysyl hydroxylase 1) (LH1)
PLOD2	O00469	2	3	5.23723	Procollagen-lysine,2-oxoglutarate 5-dioxygenase 2 (EC 1.14.11.4) (Lysyl hydroxylase 2) (LH2)
POLR2A	P24928	1	1	2.9666	DNA-directed RNA polymerase II subunit RPB1 (RNA polymerase II subunit B1) (EC 2.7.7.6) (DNA-directed RNA polymerase II subunit A) (DNA-directed RNA polymerase III largest subunit) (RNA-directed RNA polymerase II subunit RPB1) (EC 2.7.7.48)
POR	P16435	1	1	6.79556	NADPH--cytochrome P450 reductase (CPR) (P450R) (EC 1.6.2.4)
POTEE	Q6S8J3	2	6	10.7249	POTE ankyrin domain family member E (ANKRD26-like family C member 1A) (Prostate, ovary, testis-expressed protein on chromosome 2) (POTE-2)
PPIA	P62937	2	2	8.21264	Peptidyl-prolyl cis-trans isomerase A (PPIase A) (EC 5.2.1.8) (Cyclophilin A) (Cyclosporin A-binding protein) (Rotamase A) [Cleaved into: Peptidyl-prolyl cis-trans isomerase A, N-terminally processed]
PPIB	P23284	2	2	11.5563	Peptidyl-prolyl cis-trans isomerase B (PPIase B) (EC 5.2.1.8) (CYP-S1) (Cyclophilin B) (Rotamase B) (S-cyclophilin) (SCYLP)
PPP1R10	Q96QC0	1	1	9.72429	Serine/threonine-protein phosphatase 1 regulatory subunit 10 (MHC class I region proline-rich protein CAT53) (PP1-binding protein of 114 kDa) (Phosphatase 1 nuclear targeting subunit) (Protein FB19) (p99)
PPP2CA	P67775	1	1	6.92939	Serine/threonine-protein phosphatase 2A catalytic subunit alpha isoform (PP2A-alpha) (EC 3.1.3.16) (Replication protein C) (RP-C)
PPP6R2	O75170	1	1	7.66671	Serine/threonine-protein phosphatase 6 regulatory subunit 2 (SAPS domain family member 2)
PRDM10	Q9NQV6	2	2	7.21352	PR domain zinc finger protein 10 (EC 2.1.1.-) (PR domain-containing protein 10) (Tristanin)
PRDX1	Q06830	1	1	12.0088	Peroxiredoxin-1 (EC 1.11.1.15) (Natural killer cell-enhancing factor A) (NKEF-A) (Proliferation-associated gene protein) (PAG) (Thioredoxin peroxidase 2) (Thioredoxin-dependent peroxide reductase 2)
PRKCA	P17252	2	2	14.198	Protein kinase C alpha type (PKC-A) (PKC-alpha) (EC 2.7.11.13)
PRKDC	P78527	3	4	6.34169	DNA-dependent protein kinase catalytic subunit (DNA-PK catalytic subunit) (DNA-PKcs) (EC 2.7.11.1) (DNPK1) (p460)
PRMT1	Q99873	1	2	7.63546	Protein arginine N-methyltransferase 1 (EC 2.1.1.-) (Histone-arginine N-methyltransferase PRMT1) (EC 2.1.1.125) (Interferon receptor 1-bound protein 4)
PRPF31	Q8WWY3	2	2	9.60836	U4/U6 small nuclear ribonucleoprotein Prp31 (Pre-mRNA-processing factor 31) (Serologically defined breast cancer antigen NY-BR-99) (U4/U6 snRNP 61 kDa protein) (Protein 61K) (hPrp31)
PRPF4	O43172	1	1	3.3219	U4/U6 small nuclear ribonucleoprotein Prp4 (PRP4 homolog) (hPrp4) (U4/U6 snRNP 60 kDa protein) (WD splicing factor Prp4)
PRPF8	Q6P2Q9	3	3	4.63582	Pre-mRNA-processing-splicing factor 8 (220 kDa U5 snRNP-specific protein) (PRP8 homolog) (Splicing factor Prp8) (p220)
PRRC2C	Q9Y520	1	1	7.0114	Protein PRRC2C (BAT2 domain-containing protein 1) (HBV X-transactivated gene 2 protein) (HBV XAg-transactivated protein 2) (HLA-B-associated transcript 2-like 2) (Proline-rich and coiled-coil-containing protein 2C)
PSAT1	Q9Y617	3	3	8.46851	Phosphoserine aminotransferase (EC 2.6.1.52) (Phosphohydroxythreonine aminotransferase) (PSAT)
PSMA1	P25786	2	3	5.53367	Proteasome subunit alpha type-1 (EC 3.4.25.1) (30 kDa prosomal protein) (PROS-30) (Macropain subunit C2) (Multicatalytic endopeptidase complex subunit C2) (Proteasome component C2) (Proteasome nu chain)
PSMA3	P25788	2	2	5.15735	Proteasome subunit alpha type-3 (EC 3.4.25.1) (Macropain subunit C8) (Multicatalytic endopeptidase complex subunit C8) (Proteasome component C8)
PSMA4	P25789	1	1	5.86022	Proteasome subunit alpha type-4 (EC 3.4.25.1) (Macropain subunit C9) (Multicatalytic endopeptidase complex subunit C9) (Proteasome component C9) (Proteasome subunit L)
PSMA8	Q8TAA3	1	1	3.29725	Proteasome subunit alpha type-7-like (EC 3.4.25.1)
PSMB1	P20618	2	2	6.23334	Proteasome subunit beta type-1 (EC 3.4.25.1) (Macropain subunit C5) (Multicatalytic endopeptidase complex subunit C5) (Proteasome component C5) (Proteasome gamma chain)
PSMC1	P62191	2	4	8.16332	26S protease regulatory subunit 4 (P26s4) (26S proteasome AAA-ATPase subunit RPT2) (Proteasome 26S subunit ATPase 1)
PSMC2	P35998	2	3	7.51705	26S protease regulatory subunit 7 (26S proteasome AAA-ATPase subunit RPT1) (Proteasome 26S subunit ATPase 2) (Protein MSS1)
PSMD2	Q13200	2	2	6.37142	26S proteasome non-ATPase regulatory subunit 2 (26S proteasome regulatory subunit RPN1) (26S proteasome regulatory subunit S2) (26S proteasome subunit p97) (Protein 55.11) (Tumor necrosis factor type 1 receptor-associated protein 2)
PTBP1	P26599	1	1	11.2982	Polypyrimidine tract-binding protein 1 (PTB) (57 kDa RNA-binding protein PPTB-1) (Heterogeneous nuclear ribonucleoprotein I) (hnRNP I)
PTBP3	O95758	3	3	8.02718	Polypyrimidine tract-binding protein 3 (Regulator of differentiation 1) (Rod1)
PTGES3	Q15185	1	1	10.8525	Prostaglandin E synthase 3 (EC 5.3.99.3) (Cytosolic prostaglandin E2 synthase) (cPGES) (Hsp90 co-chaperone) (Progesterone receptor complex p23) (Telomerase-binding protein p23)
PTPN1	P18031	1	1	8.54998	Tyrosine-protein phosphatase non-receptor type 1 (EC 3.1.3.48) (Protein-tyrosine phosphatase 1B) (PTP-1B)
PTPRK	Q15262	1	1	7.88833	Receptor-type tyrosine-protein phosphatase kappa (Protein-tyrosine phosphatase kappa) (R-PTP-kappa) (EC 3.1.3.48)
PTTG1IP	P53801	1	2	3.65719	Pituitary tumor-transforming gene 1 protein-interacting protein (Pituitary tumor-transforming gene protein-binding factor) (PBF) (PTTG-binding factor)
PUF60	Q9UHX1	2	2	8.27441	Poly(U)-binding-splicing factor PUF60 (60 kDa poly(U)-binding-splicing factor) (FUSE-binding protein-interacting repressor) (FBP-interacting repressor) (Ro-binding protein 1) (RoBP1) (Siah-binding protein 1) (Siah-BP1)
PUS1	Q9Y606	1	2	12.199	tRNA pseudouridine synthase A, mitochondrial (EC 5.4.99.12) (tRNA pseudouridine(38-40) synthase) (tRNA pseudouridylate synthase I) (tRNA-uridine isomerase I)
PYCR1	P32322	1	5	12.903	Pyrroline-5-carboxylate reductase 1, mitochondrial (P5C reductase 1) (P5CR 1) (EC 1.5.1.2)
PYGL	P06737	2	2	10.3147	Glycogen phosphorylase, liver form (EC 2.4.1.1)
QARS	P47897	1	1	10.7282	Glutamine--tRNA ligase (EC 6.1.1.18) (Glutaminyl-tRNA synthetase) (GlnRS)
RAB10	P61026	1	1	13.2838	Ras-related protein Rab-10
RAB14	P61106	2	2	11.8934	Ras-related protein Rab-14
RAB17	Q9H0T7	1	1	7.55227	Ras-related protein Rab-17
RAB1A	P62820	1	1	9.59108	Ras-related protein Rab-1A (YPT1-related protein)
RAB3C	Q96E17	1	1	9.67272	Ras-related protein Rab-3C
RAB7A	P51149	1	1	7.7873	Ras-related protein Rab-7a
RAB8A	P61006	1	1	11.6691	Ras-related protein Rab-8A (Oncogene c-mel)
RAE1	P78406	1	1	11.3296	mRNA export factor (Rae1 protein homolog) (mRNA-associated protein mrnp 41)
RALB	P11234	2	2	9.37065	Ras-related protein Ral-B
RAN	P62826	2	3	17.5037	GTP-binding nuclear protein Ran (Androgen receptor-associated protein 24) (GTPase Ran) (Ras-like protein TC4) (Ras-related nuclear protein)
RANBP2	P49792	1	1	4.91002	E3 SUMO-protein ligase RanBP2 (EC 6.3.2.-) (358 kDa nucleoporin) (Nuclear pore complex protein Nup358) (Nucleoporin Nup358) (Ran-binding protein 2) (RanBP2) (p270)
RANBP3	Q9H6Z4	1	1	7.12381	Ran-binding protein 3 (RanBP3)
RAP2B	P61225	1	1	10.2932	Ras-related protein Rap-2b
RAP2C	Q9Y3L5	1	1	9.90918	Ras-related protein Rap-2c
RAPGEFL1	Q9UHV5	1	1	7.60614	Rap guanine nucleotide exchange factor-like 1 (Link guanine nucleotide exchange factor II) (Link GEFII)
RBM14	Q96PK6	1	1	7.36529	RNA-binding protein 14 (Paraspeckle protein 2) (PSP2) (RNA-binding motif protein 14) (RRM-containing coactivator activator/modulator) (Synaptotagmin-interacting protein) (SYT-interacting protein)
RBM19	Q9Y4C8	1	1	7.84014	Probable RNA-binding protein 19 (RNA-binding motif protein 19)
RBM25	P49756	2	2	7.62203	RNA-binding protein 25 (Arg/Glu/Asp-rich protein of 120 kDa) (RED120) (Protein S164) (RNA-binding motif protein 25) (RNA-binding region-containing protein 7)
RBM28	Q9NW13	4	4	10.8068	RNA-binding protein 28 (RNA-binding motif protein 28)
RBM6	P78332	1	2	8.18162	RNA-binding protein 6 (Lung cancer antigen NY-LU-12) (Protein G16) (RNA-binding motif protein 6) (RNA-binding protein DEF-3)
RBM8A	Q9Y5S9	1	1	12.2443	RNA-binding protein 8A (Binder of OVCA1-1) (BOV-1) (RNA-binding motif protein 8A) (RNA-binding protein Y14) (Ribonucleoprotein RBM8A)
RBMX	P38159	2	2	12.956	RNA-binding motif protein, X chromosome (Glycoprotein p43) (Heterogeneous nuclear ribonucleoprotein G) (hnRNP G) [Cleaved into: RNA-binding motif protein, X chromosome, N-terminally processed]
RCC2	Q9P258	2	2	25.7867	Protein RCC2 (RCC1-like protein TD-60) (Telophase disk protein of 60 kDa)
RDH11	Q8TC12	2	3	10.539	Retinol dehydrogenase 11 (EC 1.1.1.300) (Androgen-regulated short-chain dehydrogenase/reductase 1) (HCV core-binding protein HCBP12) (Prostate short-chain dehydrogenase/reductase 1) (Retinal reductase 1) (RalR1)
RDX	P35241	2	2	9.00893	Radixin
REEP3	Q6NUK4	1	1	7.07077	Receptor expression-enhancing protein 3
RETSAT	Q6NUM9	4	4	9.5765	All-trans-retinol 13,14-reductase (EC 1.3.99.23) (All-trans-13,14-dihydroretinol saturase) (RetSat) (PPAR-alpha-regulated and starvation-induced gene protein)
RFC1	P35251	4	4	10.1234	Replication factor C subunit 1 (Activator 1 140 kDa subunit) (A1 140 kDa subunit) (Activator 1 large subunit) (Activator 1 subunit 1) (DNA-binding protein PO-GA) (Replication factor C 140 kDa subunit) (RF-C 140 kDa subunit) (RFC140) (Replication factor C large subunit)
RHOC	P08134	1	2	7.97913	Rho-related GTP-binding protein RhoC (Rho cDNA clone 9) (h9)
RIF1	Q5UIP0	2	2	7.2248	Telomere-associated protein RIF1 (Rap1-interacting factor 1 homolog)
RNMT	O43148	2	3	9.16376	mRNA cap guanine-N7 methyltransferase (EC 2.1.1.56) (RG7MT1) (mRNA (guanine-N(7)-)-methyltransferase) (mRNA cap methyltransferase) (hCMT1) (hMet) (hcm1p)
ROCK2	O75116	1	1	5.15658	Rho-associated protein kinase 2 (EC 2.7.11.1) (Rho kinase 2) (Rho-associated, coiled-coil-containing protein kinase 2) (Rho-associated, coiled-coil-containing protein kinase II) (ROCK-II) (p164 ROCK-2)
RPA1	P27694	1	2	8.74744	Replication protein A 70 kDa DNA-binding subunit (RP-A p70) (Replication factor A protein 1) (RF-A protein 1) (Single-stranded DNA-binding protein) [Cleaved into: Replication protein A 70 kDa DNA-binding subunit, N-terminally processed]
RPL10A	P62906	1	2	6.35099	60S ribosomal protein L10a (CSA-19) (Neural precursor cell expressed developmentally down-regulated protein 6) (NEDD-6)
RPL12	P30050	1	1	10.9174	60S ribosomal protein L12
RPL13	P26373	4	6	7.53093	60S ribosomal protein L13 (Breast basic conserved protein 1)
RPL13A	P40429	1	1	12.2248	60S ribosomal protein L13a (23 kDa highly basic protein)
RPL23	P62829	1	1	9.48737	60S ribosomal protein L23 (60S ribosomal protein L17)
RPL23A	P62750	3	5	4.97843	60S ribosomal protein L23a
RPL24	P83731	1	2	9.31649	60S ribosomal protein L24 (60S ribosomal protein L30)
RPL29	P47914	1	4	8.67736	60S ribosomal protein L29 (Cell surface heparin-binding protein HIP)
RPL3	P39023	5	6	9.72975	60S ribosomal protein L3 (HIV-1 TAR RNA-binding protein B) (TARBP-B)
RPL32	P62910	1	1	9.41392	60S ribosomal protein L32
RPL34	P49207	1	1	8.67084	60S ribosomal protein L34
RPL35	P42766	1	1	6.4115	60S ribosomal protein L35
RPL35A	P18077	1	1	9.1674	60S ribosomal protein L35a (Cell growth-inhibiting gene 33 protein)
RPL37	P61927	1	2	9.20025	60S ribosomal protein L37 (G1.16)
RPL4	P36578	5	8	7.84636	60S ribosomal protein L4 (60S ribosomal protein L1)
RPL5	P46777	1	1	19.2648	60S ribosomal protein L5
RPL6	Q02878	4	6	7.49186	60S ribosomal protein L6 (Neoplasm-related protein C140) (Tax-responsive enhancer element-binding protein 107) (TaxREB107)
RPL7	P18124	1	1	13.6045	60S ribosomal protein L7
RPL7A	P62424	3	4	8.96698	60S ribosomal protein L7a (PLA-X polypeptide) (Surfeit locus protein 3)
RPL7L1	Q6DKI1	2	2	5.98883	60S ribosomal protein L7-like 1
RPL8	P62917	1	1	15.675	60S ribosomal protein L8
RPL9	P32969	1	1	9.95901	60S ribosomal protein L9
RPN1	P04843	4	7	9.45631	Dolichyl-diphosphooligosaccharide--protein glycosyltransferase subunit 1 (EC 2.4.99.18) (Dolichyl-diphosphooligosaccharide--protein glycosyltransferase 67 kDa subunit) (Ribophorin I) (RPN-I) (Ribophorin-1)
RPS11	P62280	2	5	8.22824	40S ribosomal protein S11
RPS16	P62249	2	3	6.87919	40S ribosomal protein S16
RPS18	P62269	2	2	7.80395	40S ribosomal protein S18 (Ke-3) (Ke3)
RPS2	P15880	1	1	8.66326	40S ribosomal protein S2 (40S ribosomal protein S4) (Protein LLRep3)
RPS23	P62266	1	1	12.3798	40S ribosomal protein S23
RPS3	P23396	2	2	11.1942	40S ribosomal protein S3
RPS3A	P61247	5	8	10.3362	40S ribosomal protein S3a (v-fos transformation effector protein) (Fte-1)
RPS4X	P62701	3	3	8.78736	40S ribosomal protein S4, X isoform (SCR10) (Single copy abundant mRNA protein)
RPS5	P46782	1	1	5.15428	40S ribosomal protein S5 [Cleaved into: 40S ribosomal protein S5, N-terminally processed]
RPS6	P62753	2	4	10.4217	40S ribosomal protein S6 (Phosphoprotein NP33)
RPS6KA1	Q15418	1	2	8.69368	Ribosomal protein S6 kinase alpha-1 (S6K-alpha-1) (EC 2.7.11.1) (90 kDa ribosomal protein S6 kinase 1) (p90-RSK 1) (p90RSK1) (p90S6K) (MAP kinase-activated protein kinase 1a) (MAPK-activated protein kinase 1a) (MAPKAP kinase 1a) (MAPKAPK-1a) (Ribosomal S6 kinase 1) (RSK-1)
RPS6KA2	Q15349	2	2	9.12156	Ribosomal protein S6 kinase alpha-2 (S6K-alpha-2) (EC 2.7.11.1) (90 kDa ribosomal protein S6 kinase 2) (p90-RSK 2) (p90RSK2) (MAP kinase-activated protein kinase 1c) (MAPK-activated protein kinase 1c) (MAPKAP kinase 1c) (MAPKAPK-1c) (Ribosomal S6 kinase 3) (RSK-3) (pp90RSK3)
RPS6KA6	Q9UK32	1	1	11.4874	Ribosomal protein S6 kinase alpha-6 (S6K-alpha-6) (EC 2.7.11.1) (90 kDa ribosomal protein S6 kinase 6) (p90-RSK 6) (p90RSK6) (Ribosomal S6 kinase 4) (RSK-4) (pp90RSK4)
RPS7	P62081	2	4	7.58533	40S ribosomal protein S7
RPSA	P08865	1	1	7.68967	40S ribosomal protein SA (37 kDa laminin receptor precursor) (37LRP) (37/67 kDa laminin receptor) (LRP/LR) (67 kDa laminin receptor) (67LR) (Colon carcinoma laminin-binding protein) (Laminin receptor 1) (LamR) (Laminin-binding protein precursor p40) (LBP/p40) (Multidrug resistance-associated protein MGr1-Ag) (NEM/1CHD4)
RRBP1	Q9P2E9	40	60	11.4988	Ribosome-binding protein 1 (180 kDa ribosome receptor homolog) (RRp) (ES/130-related protein) (Ribosome receptor protein)
RREB1	Q92766	1	1	4.76423	Ras-responsive element-binding protein 1 (RREB-1) (Finger protein in nuclear bodies) (Raf-responsive zinc finger protein LZ321) (Zinc finger motif enhancer-binding protein 1) (Zep-1)
RRM1	P23921	1	1	6.567	Ribonucleoside-diphosphate reductase large subunit (EC 1.17.4.1) (Ribonucleoside-diphosphate reductase subunit M1) (Ribonucleotide reductase large subunit)
RRN3	Q9NYV6	1	1	2.4894	RNA polymerase I-specific transcription initiation factor RRN3 (Transcription initiation factor IA) (TIF-IA)
RRP12	Q5JTH9	2	2	22.4465	RRP12-like protein
RSL1D1	O76021	6	7	12.4376	Ribosomal L1 domain-containing protein 1 (CATX-11) (Cellular senescence-inhibited gene protein) (Protein PBK1)
RTFDC1	Q9BY42	2	2	4.39563	Protein RTF2 homolog (Replication termination factor 2 domain-containing protein 1)
RTN3	O95197	1	2	12.605	Reticulon-3 (Homolog of ASY protein) (HAP) (Neuroendocrine-specific protein-like 2) (NSP-like protein 2) (Neuroendocrine-specific protein-like II) (NSP-like protein II) (NSPLII)
RTN4	Q9NQC3	1	1	9.27908	Reticulon-4 (Foocen) (Neurite outgrowth inhibitor) (Nogo protein) (Neuroendocrine-specific protein) (NSP) (Neuroendocrine-specific protein C homolog) (RTN-x) (Reticulon-5)
RXRB	P28702	1	2	5.64222	Retinoic acid receptor RXR-beta (Nuclear receptor subfamily 2 group B member 2) (Retinoid X receptor beta)
SAE1	Q9UBE0	2	2	5.40466	SUMO-activating enzyme subunit 1 (Ubiquitin-like 1-activating enzyme E1A) [Cleaved into: SUMO-activating enzyme subunit 1, N-terminally processed]
SAFB	Q15424	2	2	12.4198	Scaffold attachment factor B1 (SAF-B) (SAF-B1) (HSP27 estrogen response element-TATA box-binding protein) (HSP27 ERE-TATA-binding protein)
SAP18	O00422	1	1	6.3475	Histone deacetylase complex subunit SAP18 (18 kDa Sin3-associated polypeptide) (2HOR0202) (Cell growth-inhibiting gene 38 protein) (Sin3-associated polypeptide p18)
SAR1B	Q9Y6B6	1	1	6.77365	GTP-binding protein SAR1b (GTP-binding protein B) (GTBPB)
SARS	P49591	1	1	7.98005	Serine--tRNA ligase, cytoplasmic (EC 6.1.1.11) (Seryl-tRNA synthetase) (SerRS) (Seryl-tRNA(Ser/Sec) synthetase)
SART3	Q15020	2	2	8.09279	Squamous cell carcinoma antigen recognized by T-cells 3 (SART-3) (hSART-3) (Tat-interacting protein of 110 kDa) (Tip110)
SBDS	Q9Y3A5	3	4	7.35981	Ribosome maturation protein SBDS (Shwachman-Bodian-Diamond syndrome protein)
SC5D	O75845	2	2	6.49136	Lathosterol oxidase (EC 1.14.21.6) (C-5 sterol desaturase) (Delta(7)-sterol 5-desaturase) (Lathosterol 5-desaturase) (Sterol-C5-desaturase)
SCAF11	Q99590	2	2	7.82068	Protein SCAF11 (CTD-associated SR protein 11) (Renal carcinoma antigen NY-REN-40) (SC35-interacting protein 1) (SR-related and CTD-associated factor 11) (SRSF2-interacting protein) (Serine/arginine-rich splicing factor 2-interacting protein) (Splicing factor, arginine/serine-rich 2-interacting protein) (Splicing regulatory protein 129) (SRrp129)
SCARB1	Q8WTV0	1	1	4.11705	Scavenger receptor class B member 1 (SRB1) (CD36 and LIMPII analogous 1) (CLA-1) (CD36 antigen-like 1) (Collagen type I receptor, thrombospondin receptor-like 1) (SR-BI) (CD antigen CD36)
SCD	O00767	1	1	4.11754	Acyl-CoA desaturase (EC 1.14.19.1) (Delta(9)-desaturase) (Delta-9 desaturase) (Fatty acid desaturase) (Stearoyl-CoA desaturase)
SCP2	P22307	3	3	8.86264	Non-specific lipid-transfer protein (NSL-TP) (EC 2.3.1.176) (Propanoyl-CoA C-acyltransferase) (SCP-chi) (SCPX) (Sterol carrier protein 2) (SCP-2) (Sterol carrier protein X) (SCP-X)
SCYL1	Q96KG9	1	1	8.8097	N-terminal kinase-like protein (Coated vesicle-associated kinase of 90 kDa) (SCY1-like protein 1) (Telomerase regulation-associated protein) (Telomerase transcriptional element-interacting factor) (Teratoma-associated tyrosine kinase)
SDHC	Q99643	1	2	5.73702	Succinate dehydrogenase cytochrome b560 subunit, mitochondrial (Integral membrane protein CII-3) (QPs-1) (QPs1) (Succinate dehydrogenase complex subunit C) (Succinate-ubiquinone oxidoreductase cytochrome B large subunit) (CYBL)
SEC23A	Q15436	2	2	11.1744	Protein transport protein Sec23A (SEC23-related protein A)
SEC23B	Q15437	1	2	9.22352	Protein transport protein Sec23B (SEC23-related protein B)
SEC24C	P53992	2	2	10.8883	Protein transport protein Sec24C (SEC24-related protein C)
SEC24D	O94855	2	3	9.9319	Protein transport protein Sec24D (SEC24-related protein D)
SEC31A	O94979	3	5	8.9577	Protein transport protein Sec31A (ABP125) (ABP130) (SEC31-like protein 1) (SEC31-related protein A) (Web1-like protein)
SEC61A1	P61619	2	2	12.8218	Protein transport protein Sec61 subunit alpha isoform 1 (Sec61 alpha-1)
SEC63	Q9UGP8	3	3	12.1519	Translocation protein SEC63 homolog
SEPT7	Q16181	2	2	10.0558	Septin-7 (CDC10 protein homolog)
SEPT9	Q9UHD8	3	4	3.85703	Septin-9 (MLL septin-like fusion protein MSF-A) (MLL septin-like fusion protein) (Ovarian/Breast septin) (Ov/Br septin) (Septin D1)
SERPINA1	P01009	4	6	0.421902	Alpha-1-antitrypsin (Alpha-1 protease inhibitor) (Alpha-1-antiproteinase) (Serpin A1) [Cleaved into: Short peptide from AAT (SPAAT)]
SERPINE1	P05121	3	3	1.03844	Plasminogen activator inhibitor 1 (PAI) (PAI-1) (Endothelial plasminogen activator inhibitor) (Serpin E1)
SERPINH1	P50454	3	5	10.0733	Serpin H1 (47 kDa heat shock protein) (Arsenic-transactivated protein 3) (AsTP3) (Cell proliferation-inducing gene 14 protein) (Collagen-binding protein) (Colligin) (Rheumatoid arthritis-related antigen RA-A47)
SF3A3	Q12874	1	1	5.36035	Splicing factor 3A subunit 3 (SF3a60) (Spliceosome-associated protein 61) (SAP 61)
SF3B1	O75533	3	4	11.3056	Splicing factor 3B subunit 1 (Pre-mRNA-splicing factor SF3b 155 kDa subunit) (SF3b155) (Spliceosome-associated protein 155) (SAP 155)
SFN	P31947	1	1	6.23558	14-3-3 protein sigma (Epithelial cell marker protein 1) (Stratifin)
SFPQ	P23246	3	4	8.94037	Splicing factor, proline- and glutamine-rich (100 kDa DNA-pairing protein) (hPOMp100) (DNA-binding p52/p100 complex, 100 kDa subunit) (Polypyrimidine tract-binding protein-associated-splicing factor) (PSF) (PTB-associated-splicing factor)
SFSWAP	Q12872	1	1	11.0532	Splicing factor, suppressor of white-apricot homolog (Splicing factor, arginine/serine-rich 8) (Suppressor of white apricot protein homolog)
SGPL1	O95470	1	2	15.0684	Sphingosine-1-phosphate lyase 1 (S1PL) (SP-lyase 1) (SPL 1) (hSPL) (EC 4.1.2.27) (Sphingosine-1-phosphate aldolase)
SH3GL1	Q99961	1	1	8.01141	Endophilin-A2 (EEN fusion partner of MLL) (Endophilin-2) (Extra eleven-nineteen leukemia fusion gene protein) (EEN) (SH3 domain protein 2B) (SH3 domain-containing GRB2-like protein 1)
SHMT2	P34897	2	2	10.439	Serine hydroxymethyltransferase, mitochondrial (SHMT) (EC 2.1.2.1) (Glycine hydroxymethyltransferase) (Serine methylase)
SIN3A	Q96ST3	1	2	8.80299	Paired amphipathic helix protein Sin3a (Histone deacetylase complex subunit Sin3a) (Transcriptional corepressor Sin3a)
SIRT5	Q9NXA8	1	1	12.1776	NAD-dependent protein deacylase sirtuin-5, mitochondrial (EC 3.5.1.-) (Regulatory protein SIR2 homolog 5) (SIR2-like protein 5)
SKP1	P63208	2	2	7.88922	S-phase kinase-associated protein 1 (Cyclin-A/CDK2-associated protein p19) (Organ of Corti protein 2) (OCP-2) (Organ of Corti protein II) (OCP-II) (RNA polymerase II elongation factor-like protein) (SIII) (Transcription elongation factor B) (p19A) (p19skp1)
SLC12A4	Q9UP95	1	2	5.63672	Solute carrier family 12 member 4 (Electroneutral potassium-chloride cotransporter 1) (Erythroid K-Cl cotransporter 1) (hKCC1)
SLC16A1	P53985	2	2	9.72838	Monocarboxylate transporter 1 (MCT 1) (Solute carrier family 16 member 1)
SLC16A3	O15427	2	5	10.4959	Monocarboxylate transporter 4 (MCT 4) (Solute carrier family 16 member 3)
SLC20A1	Q8WUM9	1	1	6.95442	Sodium-dependent phosphate transporter 1 (Gibbon ape leukemia virus receptor 1) (GLVR-1) (Leukemia virus receptor 1 homolog) (Phosphate transporter 1) (PiT-1) (Solute carrier family 20 member 1)
SLC22A3	O75751	1	2	10.347	Solute carrier family 22 member 3 (Extraneuronal monoamine transporter) (EMT) (Organic cation transporter 3)
SLC25A1	P53007	2	3	13.65	Tricarboxylate transport protein, mitochondrial (Citrate transport protein) (CTP) (Solute carrier family 25 member 1) (Tricarboxylate carrier protein)
SLC25A3	Q00325	2	2	20.611	Phosphate carrier protein, mitochondrial (Phosphate transport protein) (PTP) (Solute carrier family 25 member 3)
SLC25A42	Q86VD7	1	2	12.199	Mitochondrial coenzyme A transporter SLC25A42 (Solute carrier family 25 member 42)
SLC25A6	P12236	1	4	34.2126	ADP/ATP translocase 3 (ADP,ATP carrier protein 3) (ADP,ATP carrier protein, isoform T2) (ANT 2) (Adenine nucleotide translocator 3) (ANT 3) (Solute carrier family 25 member 6)
SLC29A1	Q99808	2	2	14.6667	Equilibrative nucleoside transporter 1 (Equilibrative nitrobenzylmercaptopurine riboside-sensitive nucleoside transporter) (Equilibrative NBMPR-sensitive nucleoside transporter) (Nucleoside transporter, es-type) (Solute carrier family 29 member 1)
SLC2A3	P11169	1	1	7.64894	Solute carrier family 2, facilitated glucose transporter member 3 (Glucose transporter type 3, brain) (GLUT-3)
SLC38A2	Q96QD8	2	3	4.99422	Sodium-coupled neutral amino acid transporter 2 (Amino acid transporter A2) (Protein 40-9-1) (Solute carrier family 38 member 2) (System A amino acid transporter 2) (System A transporter 1) (System N amino acid transporter 2)
SLC3A2	P08195	2	3	10.153	4F2 cell-surface antigen heavy chain (4F2hc) (4F2 heavy chain antigen) (Lymphocyte activation antigen 4F2 large subunit) (Solute carrier family 3 member 2) (CD antigen CD98)
SLC43A2	Q8N370	2	2	5.9718	Large neutral amino acids transporter small subunit 4 (L-type amino acid transporter 4) (Solute carrier family 43 member 2)
SLTM	Q9NWH9	2	2	10.7083	SAFB-like transcription modulator (Modulator of estrogen-induced transcription)
SMARCA1	P28370	4	4	4.3414	Probable global transcription activator SNF2L1 (EC 3.6.4.-) (ATP-dependent helicase SMARCA1) (Nucleosome-remodeling factor subunit SNF2L) (SWI/SNF-related matrix-associated actin-dependent regulator of chromatin subfamily A member 1)
SMARCA5	O60264	2	2	5.67921	SWI/SNF-related matrix-associated actin-dependent regulator of chromatin subfamily A member 5 (SWI/SNF-related matrix-associated actin-dependent regulator of chromatin A5) (EC 3.6.4.-) (Sucrose nonfermenting protein 2 homolog) (hSNF2H)
SMARCC1	Q92922	4	4	4.20522	SWI/SNF complex subunit SMARCC1 (BRG1-associated factor 155) (BAF155) (SWI/SNF complex 155 kDa subunit) (SWI/SNF-related matrix-associated actin-dependent regulator of chromatin subfamily C member 1)
SMARCD2	Q92925	1	1	3.32078	SWI/SNF-related matrix-associated actin-dependent regulator of chromatin subfamily D member 2 (60 kDa BRG-1/Brm-associated factor subunit B) (BRG1-associated factor 60B) (BAF60B)
SMC2	O95347	1	1	8.20487	Structural maintenance of chromosomes protein 2 (SMC protein 2) (SMC-2) (Chromosome-associated protein E) (hCAP-E) (XCAP-E homolog)
SND1	Q7KZF4	1	1	9.73385	Staphylococcal nuclease domain-containing protein 1 (100 kDa coactivator) (EBNA2 coactivator p100) (Tudor domain-containing protein 11) (p100 co-activator)
SNRNP200	O75643	2	3	5.52793	U5 small nuclear ribonucleoprotein 200 kDa helicase (EC 3.6.4.13) (Activating signal cointegrator 1 complex subunit 3-like 1) (BRR2 homolog) (U5 snRNP-specific 200 kDa protein) (U5-200KD)
SNRPB2	P08579	1	1	3.29317	U2 small nuclear ribonucleoprotein B'' (U2 snRNP B'')
SPATS2L	Q9NUQ6	3	3	10.9037	SPATS2-like protein (DNA polymerase-transactivated protein 6) (Stress granule and nucleolar protein) (SGNP)
SPTBN1	Q01082	8	12	8.5405	Spectrin beta chain, non-erythrocytic 1 (Beta-II spectrin) (Fodrin beta chain) (Spectrin, non-erythroid beta chain 1)
SPTBN4	Q9H254	2	2	8.2675	Spectrin beta chain, non-erythrocytic 4 (Beta-IV spectrin) (Spectrin, non-erythroid beta chain 3)
SPTLC1	O15269	2	3	4.88614	Serine palmitoyltransferase 1 (EC 2.3.1.50) (Long chain base biosynthesis protein 1) (LCB 1) (Serine-palmitoyl-CoA transferase 1) (SPT 1) (SPT1)
SQLE	Q14534	1	1	5.81646	Squalene monooxygenase (EC 1.14.13.132) (Squalene epoxidase) (SE)
SRP14	P37108	2	3	7.6752	Signal recognition particle 14 kDa protein (SRP14) (18 kDa Alu RNA-binding protein)
SRP54	P61011	3	3	8.59451	Signal recognition particle 54 kDa protein (SRP54)
SRP72	O76094	2	4	12.6764	Signal recognition particle subunit SRP72 (SRP72) (Signal recognition particle 72 kDa protein)
SRPR	P08240	1	1	12.532	Signal recognition particle receptor subunit alpha (SR-alpha) (Docking protein alpha) (DP-alpha)
SRRT	Q9BXP5	2	2	6.42338	Serrate RNA effector molecule homolog (Arsenite-resistance protein 2)
SRSF3	P84103	1	1	15.6998	Serine/arginine-rich splicing factor 3 (Pre-mRNA-splicing factor SRP20) (Splicing factor, arginine/serine-rich 3)
SRSF7	Q16629	1	1	11.6711	Serine/arginine-rich splicing factor 7 (Splicing factor 9G8) (Splicing factor, arginine/serine-rich 7)
SSB	P05455	1	1	5.9785	Lupus La protein (La autoantigen) (La ribonucleoprotein) (Sjoegren syndrome type B antigen) (SS-B)
SSR1	P43307	2	2	9.71883	Translocon-associated protein subunit alpha (TRAP-alpha) (Signal sequence receptor subunit alpha) (SSR-alpha)
SSRP1	Q08945	3	3	12.4734	FACT complex subunit SSRP1 (Chromatin-specific transcription elongation factor 80 kDa subunit) (Facilitates chromatin transcription complex 80 kDa subunit) (FACT 80 kDa subunit) (FACTp80) (Facilitates chromatin transcription complex subunit SSRP1) (Recombination signal sequence recognition protein 1) (Structure-specific recognition protein 1) (hSSRP1) (T160)
STARD7	Q9NQZ5	1	1	3.41368	StAR-related lipid transfer protein 7, mitochondrial (Gestational trophoblastic tumor protein 1) (START domain-containing protein 7) (StARD7)
STAT3	P40763	1	1	10.3208	Signal transducer and activator of transcription 3 (Acute-phase response factor)
STAT6	P42226	1	1	7.06356	Signal transducer and activator of transcription 6 (IL-4 Stat)
STAU1	O95793	2	3	8.19032	Double-stranded RNA-binding protein Staufen homolog 1
STIM1	Q13586	1	1	6.14601	Stromal interaction molecule 1
STMN2	Q93045	1	2	6.60959	Stathmin-2 (Superior cervical ganglion-10 protein) (Protein SCG10)
STRAP	Q9Y3F4	1	2	8.70241	Serine-threonine kinase receptor-associated protein (MAP activator with WD repeats) (UNR-interacting protein) (WD-40 repeat protein PT-WD)
STRIP1	Q5VSL9	1	1	6.19656	Striatin-interacting protein 1 (Protein FAM40A)
SUCLG1	P53597	1	3	11.9632	Succinyl-CoA ligase [ADP/GDP-forming] subunit alpha, mitochondrial (EC 6.2.1.4) (EC 6.2.1.5) (Succinyl-CoA synthetase subunit alpha) (SCS-alpha)
SULT1A1	P50225	1	1	12.2638	Sulfotransferase 1A1 (ST1A1) (EC 2.8.2.1) (Aryl sulfotransferase 1) (HAST1/HAST2) (Phenol sulfotransferase 1) (Phenol-sulfating phenol sulfotransferase 1) (P-PST 1) (ST1A3) (Thermostable phenol sulfotransferase) (Ts-PST)
SULT1A3	P50224	3	3	8.75739	Sulfotransferase 1A3/1A4 (ST1A3/ST1A4) (EC 2.8.2.1) (Aryl sulfotransferase 1A3/1A4) (Catecholamine-sulfating phenol sulfotransferase) (HAST3) (M-PST) (Monoamine-sulfating phenol sulfotransferase) (Placental estrogen sulfotransferase) (Sulfotransferase, monoamine-preferring) (Thermolabile phenol sulfotransferase) (TL-PST)
SULT2A1	Q06520	1	1	8.85359	Bile salt sulfotransferase (EC 2.8.2.14) (Dehydroepiandrosterone sulfotransferase) (DHEA-ST) (Hydroxysteroid Sulfotransferase) (HST) (ST2) (ST2A3) (Sulfotransferase 2A1) (ST2A1)
SUMO3	P55854	1	1	7.22631	Small ubiquitin-related modifier 3 (SUMO-3) (SMT3 homolog 1) (SUMO-2) (Ubiquitin-like protein SMT3B) (Smt3B)
SUPT16H	Q9Y5B9	3	3	12.0275	FACT complex subunit SPT16 (Chromatin-specific transcription elongation factor 140 kDa subunit) (FACT 140 kDa subunit) (FACTp140) (Facilitates chromatin transcription complex subunit SPT16) (hSPT16)
SUPT6H	Q7KZ85	1	1	6.56949	Transcription elongation factor SPT6 (hSPT6) (Histone chaperone suppressor of Ty6) (Tat-cotransactivator 2 protein) (Tat-CT2 protein)
SUPV3L1	Q8IYB8	1	1	12.9198	ATP-dependent RNA helicase SUPV3L1, mitochondrial (EC 3.6.4.13) (Suppressor of var1 3-like protein 1) (SUV3-like protein 1)
SYMPK	Q92797	1	1	5.01663	Symplekin
TAF15	Q92804	1	3	17.1317	TATA-binding protein-associated factor 2N (68 kDa TATA-binding protein-associated factor) (TAF(II)68) (TAFII68) (RNA-binding protein 56)
TALDO1	P37837	2	2	7.18734	Transaldolase (EC 2.2.1.2)
TARS	P26639	1	1	13.5169	Threonine--tRNA ligase, cytoplasmic (EC 6.1.1.3) (Threonyl-tRNA synthetase) (ThrRS)
TBCA	O75347	1	1	7.4364	Tubulin-specific chaperone A (TCP1-chaperonin cofactor A) (Tubulin-folding cofactor A) (CFA)
TCEA1	P23193	1	1	9.21738	Transcription elongation factor A protein 1 (Transcription elongation factor S-II protein 1) (Transcription elongation factor TFIIS.o)
TCOF1	Q13428	3	3	13.1104	Treacle protein (Treacher Collins syndrome protein)
TCP1	P17987	1	1	7.07149	T-complex protein 1 subunit alpha (TCP-1-alpha) (CCT-alpha)
TECR	Q9NZ01	3	4	16.7144	Very-long-chain enoyl-CoA reductase (EC 1.3.1.93) (Synaptic glycoprotein SC2) (Trans-2,3-enoyl-CoA reductase) (TER)
TELO2	Q9Y4R8	1	2	7.43481	Telomere length regulation protein TEL2 homolog (Protein clk-2 homolog) (hCLK2)
TF	P02787	7	7	1.4443	Serotransferrin (Transferrin) (Beta-1 metal-binding globulin) (Siderophilin)
TFAM	Q00059	2	2	11.4136	Transcription factor A, mitochondrial (mtTFA) (Mitochondrial transcription factor 1) (MtTF1) (Transcription factor 6) (TCF-6) (Transcription factor 6-like 2)
TFPI	P10646	2	2	1.19984	Tissue factor pathway inhibitor (TFPI) (Extrinsic pathway inhibitor) (EPI) (Lipoprotein-associated coagulation inhibitor) (LACI)
TFRC	P02786	5	7	4.40905	Transferrin receptor protein 1 (TR) (TfR) (TfR1) (Trfr) (T9) (p90) (CD antigen CD71) [Cleaved into: Transferrin receptor protein 1, serum form (sTfR)]
THOC2	Q8NI27	1	1	7.55145	THO complex subunit 2 (Tho2) (hTREX120)
THRAP3	Q9Y2W1	2	3	12.0338	Thyroid hormone receptor-associated protein 3 (Thyroid hormone receptor-associated protein complex 150 kDa component) (Trap150)
TIAL1	Q01085	1	2	9.38715	Nucleolysin TIAR (TIA-1-related protein)
TIMELESS	Q9UNS1	2	2	3.73041	Protein timeless homolog (hTIM)
TLE4	Q04727	1	1	7.62622	Transducin-like enhancer protein 4
TLN1	Q9Y490	3	4	7.94802	Talin-1
TM9SF3	Q9HD45	1	1	9.38842	Transmembrane 9 superfamily member 3 (EP70-P-iso) (SM-11044-binding protein)
TM9SF4	Q92544	2	2	9.16498	Transmembrane 9 superfamily member 4
TMA7	Q9Y2S6	1	2	10.0675	Translation machinery-associated protein 7 (Coiled-coil domain-containing protein 72)
TMED10	P49755	1	2	16.7023	Transmembrane emp24 domain-containing protein 10 (21 kDa transmembrane-trafficking protein) (S31III125) (S31I125) (Tmp-21-I) (Transmembrane protein Tmp21) (p23) (p24 family protein delta-1) (p24delta1) (p24delta)
TMED2	Q15363	1	1	10.4579	Transmembrane emp24 domain-containing protein 2 (Membrane protein p24A) (p24) (p24 family protein beta-1) (p24beta1)
TMEM214	Q6NUQ4	2	3	13.9635	Transmembrane protein 214
TMSB10	P63313	1	1	5.61662	Thymosin beta-10
TMX2	Q9Y320	1	2	9.7093	Thioredoxin-related transmembrane protein 2 (Cell proliferation-inducing gene 26 protein) (Thioredoxin domain-containing protein 14)
TOMM70A	O94826	2	2	11.6534	Mitochondrial import receptor subunit TOM70 (Mitochondrial precursor proteins import receptor) (Translocase of outer membrane 70 kDa subunit)
TOP1	P11387	1	2	7.6803	DNA topoisomerase 1 (EC 5.99.1.2) (DNA topoisomerase I)
TOP2A	P11388	4	5	9.79713	DNA topoisomerase 2-alpha (EC 5.99.1.3) (DNA topoisomerase II, alpha isozyme)
TOP2B	Q02880	2	3	9.39606	DNA topoisomerase 2-beta (EC 5.99.1.3) (DNA topoisomerase II, beta isozyme)
TPI1	P60174	5	8	9.39606	Triosephosphate isomerase (TIM) (EC 5.3.1.1) (Triose-phosphate isomerase)
TPT1	P13693	1	1	4.71304	Translationally-controlled tumor protein (TCTP) (Fortilin) (Histamine-releasing factor) (HRF) (p23)
TPX2	Q9ULW0	4	5	5.41268	Targeting protein for Xklp2 (Differentially expressed in cancerous and non-cancerous lung cells 2) (DIL-2) (Hepatocellular carcinoma-associated antigen 519) (Protein fls353) (Restricted expression proliferation-associated protein 100) (p100)
TRAP1	Q12931	1	1	8.3331	Heat shock protein 75 kDa, mitochondrial (HSP 75) (TNFR-associated protein 1) (Tumor necrosis factor type 1 receptor-associated protein) (TRAP-1)
TRIM25	Q14258	3	3	8.16524	E3 ubiquitin/ISG15 ligase TRIM25 (EC 6.3.2.19) (EC 6.3.2.n3) (Estrogen-responsive finger protein) (RING finger protein 147) (Tripartite motif-containing protein 25) (Ubiquitin/ISG15-conjugating enzyme TRIM25) (Zinc finger protein 147)
TRIM33	Q9UPN9	1	1	8.84568	E3 ubiquitin-protein ligase TRIM33 (EC 6.3.2.-) (Ectodermin homolog) (RET-fused gene 7 protein) (Protein Rfg7) (Transcription intermediary factor 1-gamma) (TIF1-gamma) (Tripartite motif-containing protein 33)
TSFM	P43897	2	2	11.6967	Elongation factor Ts, mitochondrial (EF-Ts) (EF-TsMt)
TTC37	Q6PGP7	1	1	6.66103	Tetratricopeptide repeat protein 37 (TPR repeat protein 37) (SKI3 homolog) (Ski3) (Tricho-hepatic-enteric syndrome protein) (Thespin)
TUBA1B	P68363	2	3	5.51737	Tubulin alpha-1B chain (Alpha-tubulin ubiquitous) (Tubulin K-alpha-1) (Tubulin alpha-ubiquitous chain)
TUBB2A	Q13885	1	2	7.37469	Tubulin beta-2A chain (Tubulin beta class IIa)
TUBB3	Q13509	1	2	5.9294	Tubulin beta-3 chain (Tubulin beta-4 chain) (Tubulin beta-III)
TXLNA	P40222	1	1	6.08878	Alpha-taxilin
U2AF2	P26368	2	2	11.6613	Splicing factor U2AF 65 kDa subunit (U2 auxiliary factor 65 kDa subunit) (hU2AF(65)) (hU2AF65) (U2 snRNP auxiliary factor large subunit)
UBA1	P22314	2	2	7.5978	Ubiquitin-like modifier-activating enzyme 1 (Protein A1S9) (Ubiquitin-activating enzyme E1)
UBA2	Q9UBT2	2	4	15.6963	SUMO-activating enzyme subunit 2 (EC 6.3.2.-) (Anthracycline-associated resistance ARX) (Ubiquitin-like 1-activating enzyme E1B) (Ubiquitin-like modifier-activating enzyme 2)
UBAP2L	Q14157	2	2	5.72612	Ubiquitin-associated protein 2-like (Protein NICE-4)
UBC	P0CG48	2	3	4.12956	Polyubiquitin-C [Cleaved into: Ubiquitin]
UBE2M	P61081	1	1	8.05798	NEDD8-conjugating enzyme Ubc12 (EC 6.3.2.-) (NEDD8 carrier protein) (NEDD8 protein ligase) (Ubiquitin-conjugating enzyme E2 M)
UBE2T	Q9NPD8	1	2	3.94484	Ubiquitin-conjugating enzyme E2 T (EC 6.3.2.19) (Cell proliferation-inducing gene 50 protein) (Ubiquitin carrier protein T) (Ubiquitin-protein ligase T)
UBL5	Q9BZL1	1	2	3.50978	Ubiquitin-like protein 5
UBR4	Q5T4S7	6	7	10.2114	E3 ubiquitin-protein ligase UBR4 (EC 6.3.2.-) (600 kDa retinoblastoma protein-associated factor) (N-recognin-4) (Retinoblastoma-associated factor of 600 kDa) (RBAF600) (p600) (Zinc finger UBR1-type protein 1)
UBXN4	Q92575	1	1	9.17104	UBX domain-containing protein 4 (Erasin) (UBX domain-containing protein 2)
UGDH	O60701	2	2	8.83778	UDP-glucose 6-dehydrogenase (UDP-Glc dehydrogenase) (UDP-GlcDH) (UDPGDH) (EC 1.1.1.22)
UGGT1	Q9NYU2	3	4	10.9295	UDP-glucose:glycoprotein glucosyltransferase 1 (UGT1) (hUGT1) (EC 2.4.1.-) (UDP--Glc:glycoprotein glucosyltransferase) (UDP-glucose ceramide glucosyltransferase-like 1)
UPF1	Q92900	1	1	8.91622	Regulator of nonsense transcripts 1 (EC 3.6.4.-) (ATP-dependent helicase RENT1) (Nonsense mRNA reducing factor 1) (NORF1) (Up-frameshift suppressor 1 homolog) (hUpf1)
USO1	O60763	1	1	9.47829	General vesicular transport factor p115 (Protein USO1 homolog) (Transcytosis-associated protein) (TAP) (Vesicle-docking protein)
USP14	P54578	4	5	8.80634	Ubiquitin carboxyl-terminal hydrolase 14 (EC 3.4.19.12) (Deubiquitinating enzyme 14) (Ubiquitin thioesterase 14) (Ubiquitin-specific-processing protease 14)
USP48	Q86UV5	1	1	6.56452	Ubiquitin carboxyl-terminal hydrolase 48 (EC 3.4.19.12) (Deubiquitinating enzyme 48) (Ubiquitin thioesterase 48) (Ubiquitin-specific-processing protease 48)
USP7	Q93009	1	1	10.9312	Ubiquitin carboxyl-terminal hydrolase 7 (EC 3.4.19.12) (Deubiquitinating enzyme 7) (Herpesvirus-associated ubiquitin-specific protease) (Ubiquitin thioesterase 7) (Ubiquitin-specific-processing protease 7)
USP9X	Q93008	1	1	10.7665	Probable ubiquitin carboxyl-terminal hydrolase FAF-X (EC 3.4.19.12) (Deubiquitinating enzyme FAF-X) (Fat facets in mammals) (hFAM) (Fat facets protein-related, X-linked) (Ubiquitin thioesterase FAF-X) (Ubiquitin-specific protease 9, X chromosome) (Ubiquitin-specific-processing protease FAF-X)
VAPB	O95292	1	1	9.39478	Vesicle-associated membrane protein-associated protein B/C (VAMP-B/VAMP-C) (VAMP-associated protein B/C) (VAP-B/VAP-C)
VARS	P26640	3	4	10.507	Valine--tRNA ligase (EC 6.1.1.9) (Protein G7a) (Valyl-tRNA synthetase) (ValRS)
VAT1	Q99536	1	1	8.2962	Synaptic vesicle membrane protein VAT-1 homolog (EC 1.-.-.-)
VBP1	P61758	1	2	9.68759	Prefoldin subunit 3 (HIBBJ46) (Von Hippel-Lindau-binding protein 1) (VBP-1) (VHL-binding protein 1)
VCL	P18206	2	2	8.06266	Vinculin (Metavinculin) (MV)
VCP	P55072	3	4	8.60732	Transitional endoplasmic reticulum ATPase (TER ATPase) (EC 3.6.4.6) (15S Mg(2+)-ATPase p97 subunit) (Valosin-containing protein) (VCP)
VDAC2	P45880	2	2	8.78625	Voltage-dependent anion-selective channel protein 2 (VDAC-2) (hVDAC2) (Outer mitochondrial membrane protein porin 2)
VDAC3	Q9Y277	1	2	10.7682	Voltage-dependent anion-selective channel protein 3 (VDAC-3) (hVDAC3) (Outer mitochondrial membrane protein porin 3)
VIL1	P09327	4	5	9.98771	Villin-1
VPS29	Q9UBQ0	1	1	7.2414	Vacuolar protein sorting-associated protein 29 (hVPS29) (EC 3.1.3.3) (PEP11 homolog) (Vesicle protein sorting 29)
VPS52	Q8N1B4	2	2	4.17408	Vacuolar protein sorting-associated protein 52 homolog (SAC2 suppressor of actin mutations 2-like protein)
WARS	P23381	2	2	10.6295	Tryptophan--tRNA ligase, cytoplasmic (EC 6.1.1.2) (Interferon-induced protein 53) (IFP53) (Tryptophanyl-tRNA synthetase) (TrpRS) (hWRS) [Cleaved into: T1-TrpRS; T2-TrpRS]
WBP11	Q9Y2W2	2	2	10.5102	WW domain-binding protein 11 (WBP-11) (Npw38-binding protein) (NpwBP) (SH3 domain-binding protein SNP70) (Splicing factor that interacts with PQBP-1 and PP1)
WBP2	Q969T9	1	1	3.80704	WW domain-binding protein 2 (WBP-2)
WDR43	Q15061	1	2	13.0071	WD repeat-containing protein 43
XDH	P47989	1	2	11.0904	Xanthine dehydrogenase/oxidase [Includes: Xanthine dehydrogenase (XD) (EC 1.17.1.4); Xanthine oxidase (XO) (EC 1.17.3.2) (Xanthine oxidoreductase) (XOR)]
XPO1	O14980	3	3	10.5374	Exportin-1 (Exp1) (Chromosome region maintenance 1 protein homolog)
XRCC5	P13010	3	3	12.2076	X-ray repair cross-complementing protein 5 (EC 3.6.4.-) (86 kDa subunit of Ku antigen) (ATP-dependent DNA helicase 2 subunit 2) (ATP-dependent DNA helicase II 80 kDa subunit) (CTC box-binding factor 85 kDa subunit) (CTC85) (CTCBF) (DNA repair protein XRCC5) (Ku80) (Ku86) (Lupus Ku autoantigen protein p86) (Nuclear factor IV) (Thyroid-lupus autoantigen) (TLAA) (X-ray repair complementing defective…
XRCC6	P12956	4	6	9.17225	X-ray repair cross-complementing protein 6 (EC 3.6.4.-) (EC 4.2.99.-) (5'-deoxyribose-5-phosphate lyase Ku70) (5'-dRP lyase Ku70) (70 kDa subunit of Ku antigen) (ATP-dependent DNA helicase 2 subunit 1) (ATP-dependent DNA helicase II 70 kDa subunit) (CTC box-binding factor 75 kDa subunit) (CTC75) (CTCBF) (DNA repair protein XRCC6) (Lupus Ku autoantigen protein p70) (Ku70) (Thyroid-lupus autoantige…
XRN2	Q9H0D6	2	2	5.80768	5'-3' exoribonuclease 2 (EC 3.1.13.-) (DHM1-like protein) (DHP protein)
YARS	P54577	1	2	9.8908	Tyrosine--tRNA ligase, cytoplasmic (EC 6.1.1.1) (Tyrosyl-tRNA synthetase) (TyrRS) [Cleaved into: Tyrosine--tRNA ligase, cytoplasmic, N-terminally processed]
YBX1	P67809	1	2	17.1317	Nuclease-sensitive element-binding protein 1 (CCAAT-binding transcription factor I subunit A) (CBF-A) (DNA-binding protein B) (DBPB) (Enhancer factor I subunit A) (EFI-A) (Y-box transcription factor) (Y-box-binding protein 1) (YB-1)
YBX3	P16989	2	2	11.4211	Y-box-binding protein 3 (Cold shock domain-containing protein A) (DNA-binding protein A) (Single-strand DNA-binding protein NF-GMB)
YWHAE	P62258	1	1	8.68823	14-3-3 protein epsilon (14-3-3E)
YWHAG	P61981	2	2	11.1206	14-3-3 protein gamma (Protein kinase C inhibitor protein 1) (KCIP-1) [Cleaved into: 14-3-3 protein gamma, N-terminally processed]
ZFR	Q96KR1	1	1	10.2719	Zinc finger RNA-binding protein (hZFR) (M-phase phosphoprotein homolog)
ZMPSTE24	O75844	1	2	10.0924	CAAX prenyl protease 1 homolog (EC 3.4.24.84) (Farnesylated proteins-converting enzyme 1) (FACE-1) (Prenyl protein-specific endoprotease 1) (Zinc metalloproteinase Ste24 homolog)
ZRANB2	O95218	2	2	13.9945	Zinc finger Ran-binding domain-containing protein 2 (Zinc finger protein 265) (Zinc finger, splicing)
